# Supplementary material
Source: PubMed Central journal article supplement (PMC11248270)
Supplement: NIHMS1972559-supplement-Suppl_Results.pdf [file NIHMS1972559-supplement-Suppl_Results.pdf]

## SUPPLEMENT

### SUPPLEMENTARY RESULTS

#### Development and validation of decellularized intestinal tissue models

A robust model is essential to perform a relevant functional analysis of intestinal extracellular matrix (ECM), and therefore we developed, tested, and compared three different protocols for human full thickness gut tissue decellularization[1, 2, 3]. Each protocol differed based on the main detergent: sodium dodecyl sulfate (SDS), sodium deoxycholate (SDC) or peracetic acid (PAA) (Figure S1). Prespecified criteria for selection of the optimal protocol included removal of all cellular components as indicated by multiple methods, retention of key ECM molecules, and preservation of structural integrity and ability to re-adhere human intestinal myofibroblasts (HIMF). All three protocols resulted in a translucent whitish tissue that retained the structural integrity of the mucosa, submucosa and muscularis propria with no apparent difference among the protocols (Figure S2). This was confirmed by immunofluorescence (IF) staining of the major ECM components collagen I (COLI), collagen III (COLIII) and fibronectin (FN) irrespective of the decellularization methods (Figure S3). Compared to native tissue, decellularized tissues showed a marked drop in DNA and RNA content, the strongest reduction being observed with the SDC protocol for DNA and the SDC and PAA protocols for RNA (Figure S4A&B). Gene expression levels of housekeeping genes HSP90AB1, UBC, B2M, GUSB, ACTB, GAPDH, HPRT1, TFRC, PPIA, RPLP0 and RPL13A all dramatically dropped in all three protocols compared to native tissues, with the SDC protocol exhibiting undetectable levels of these genes (Figure S4C). Compared to native tissue only the SDC protocol showed complete absence of F-actin by IF

staining (Figure S4D). The cellular proteins E-cadherin, cytokeratin-19, vimentin,  $\beta$ -tubulin, phosphatase and tensin homolog and glyceraldehyde 3-phosphate dehydrogenase showed that all proteins were undetectable in all protocols except for  $\alpha$ -smooth muscle actin ( $\alpha$ -SMA), which was residual in the SDS and PAA but not the SDC protocol (Figure S4E). Finally, HIMF adhered to SDC- decellularized ECM, indicating that the SDC protocol generated not only a structurally but also a functional intact ECM (Figure S4F).

#### Matrisome analysis of intestinal tissues using the three tested decellularization protocols

To further understand, how the decellularization protocols differentially affect matrix protein composition and in addition to the extensive validation experiments mentioned above, we performed a pilot proteomic analysis of the three decellularization protocols using one tissue each from ulcerative colitis (UC) and non-strictured (CDns) and subjected them to liquid chromatography mass spectrometry (LC-MS) as previously described[4]. Proteins that passed quality control were interrogated. Principal component analysis (PCA) of the top 500 identified proteins revealed that the native, non-decellularized tissues largely clustered with the PAA and the SDS protocol, whereas the SDC protocol showed the strongest differences in both UC and CD (Figure S3B). To ensure that the ECM remains intact in the decellularization protocols we assessed the protein amount of the top 11 distinctive ECM proteins and compared their fold change relative to the native, non-digested tissue. Overall, the relative contribution of ECM molecules to the total pool of proteins increased after decellularization, which is expected given the removal of cellular proteins in the decellularization process (Figure S3C). Of note, the strongest relative increases of the top expressed ECM molecules were observed in the SDC protocol, which together with the PCA data suggests, that in this protocol cellular proteins are removed most effectively, but ECM

composition is retained (Figure S3C). The SDC protocol was therefore selected as the optimal model based on the above results and used for matrisome analysis.

#### Effect of MFGE8 on human intestinal myofibroblasts cytokine secretion

To evaluate whether the lack of responsiveness of HIMF to MFGE8 was specific for ECM molecules or if this also applied to cytokines, we measured cytokine concentrations in the supernatants of HIMF exposed to MFGE8 or vehicle for 48h using a flow cytometry cytokine assay. We found spontaneous expression of interleukin (IL)-6, IL-8 and monocyte chemotactic protein (MCP)-1 in HIMF. Upon exposure to MFGE8 all tested HIMF lines, (NL, UC, CDns and CDs) reduced expression of IL-6. In contrast IL-8 and MCP-1 either increased or decreased upon exposure to MFGE8 within each experimental group. IL-1 $\beta$ , IL-10 and TNF were not detectable (Figure S9).

#### Next generation sequencing of HIMF points to integrin signaling of MFGE8

The lack of anti-fibrotic response of CDs HIMF to MFGE8 led us to investigate potential reasons for this observation. We therefore assessed differentially expressed genes in HIMF exposed or not to MFGE8 using next generation RNA sequencing[5] and differential statistical RNA-seq analysis using leading DGE tools such as *edgeR* and *Limma* packages[5, 6, 7].

Upon exposure to MFGE8 107 genes were up- and 44 genes were down-regulated in NL HIMF (2-fold change,  $p < 0.01$ ), as displayed in volcano plot (Figure 5A) and Venn diagram (Figure 5B). The top 30 up or downregulated genes were shown in Figure 5C. Pathway enrichment (gProfiler) analysis showed that 93 pathways domains were upregulated and 12 were downregulated upon exposure of NL HIMF to MFGE8 ( $p < 0.01$ ) (Table S2). This global gene expression analysis indicates the MFGE8 was a leading regulator of ECM organization and ECM-cell interactions.

We next assessed the response of CDs HIMF to MFGE8, which revealed 6 genes (SNORD43, NBL1, HAPLN4, ZMAT1, CLMAT3, LOC100506606) were up-regulated while 4 genes (SPRY4-AS1, OSTCP1, ZDHHC11B, TAF7L) were downregulated in CDs HIMF (2-fold change,  $p < 0.01$ ), as displayed in the volcano plot (Figure 5A) and Venn diagram (Figure 5B). The top 30 up or downregulated genes were shown in Figure 5C. Pathway enrichment analysis indicates enrichment of TGF- $\beta$  signaling pathways and positive regulation of pathway-restricted SMAD protein phosphorylation (Table S3).

To elucidate pathways potentially involved in the observed differential response of NL and CDs we next investigated the differentially MFGE8-regulated genes in these two groups. Assessing the uniquely upregulated genes in HIMF NL in response to MFGE8 that were not regulated in HIMF CDs as the input, GO genesSet enrichment analysis revealed interferon  $\alpha/\beta$  signaling, cytokine-mediated signaling, and cell surface receptor signaling as the major pathways (Table S4). When focusing on ECM-cell interactions, the pathway analysis indicated induction of ECM organization (HSA-1474244), ECM-integrin interaction (HSA-216083), cell adhesion (HAS-04514), proliferation (GO:0042127) and chemotaxis (GO:0050921) (Figure 5D). Based on these observations, we evaluated the proliferation and migration of NL HIMF in response to MFGE8. Using three different doses of MFGE8, no change in either proliferation or migration of NL HIMF was noted in comparison to untreated NL HIMF (Figure S10). These results suggest that MFGE8 exerts anti-fibrotic effects in NL HIMF, through reduction in ECM production and potentially integrin pathways, but these effects are blunted or missing in CDs HIMF.

## SUPPLEMENTARY MATERIALS AND METHODS

### Decellularization of colonic tissue sections

After a thorough literature search, we selected three decellularization protocols based on the type of detergent used, the number of publications per protocol and applicability to intestinal resection tissues, which are based on sodium dodecyl sulfate (SDS), sodium deoxycholate (SDC) and peracetic acid (PAA) respectively. The protocols were reviewed and adapted as found applicable to our experimental set-up[1, 2, 3]. For the sake of this publication, we named the protocols after the main detergent in each procedure. Details for each protocol are depicted in [Figure S1](#). Briefly, freshly resected human intestinal tissues (patient demographics can be found in [Table S1](#)) were harvested, rinsed in Hank's balanced salt solution (HBSS) and mucus and blood clots were removed. The mesenteric or creeping fat was separated from the intestine by sharp dissection. Each tissue was subsequently cut into three equal segments (approximately 2-5g each) and assigned to each of the three protocols. All three protocols shared similar processes on the first day pertaining to tissue harvest, cleaning and use of anti-microbials. Then, three different protocols were followed for the decellularization of the tissue. Details can be found in [Figure S1](#).

For the protocol with SDS detergent (Sigma, St. Louis, MO, USA) [8], tissues were stored in Belzer UW Cold Storage Solution (Bridge to Life Ltd, Columbia, SC) with 2.5% 2500U penicillin, 2500µg streptomycin sulfate, 625µg amphotericin B (PSF, Loza Basel, Switzerland) overnight at 4 °C. On the second day, they were washed in sterile phosphate-buffered saline (PBS) and then placed in 1% SDS rotating for 6 hours, followed by 10% Triton X-100 (Sigma, St. Louis, MO, USA), for 1 hour at room temperature (RT).

For the protocol with SDC (Sigma, St. Louis, MO, USA)[2] tissues were immersed in double-distilled water (ddH<sub>2</sub>O) with 2.5% PSF rotating overnight at RT on the first day and for 3 hours at the beginning of the second day, followed by 4°C for 5 hours after changing the solution. Next,

tissues were incubated in 4% SDC overnight at 4°C, the SDC was changed and applied for another 7 hours at room temperature.

For the protocol with PAA (Pfaltzandbauer, Waterbury, CT) [3], tissues were stored in Belzer UW Cold Storage Solution with 2.5% PSF overnight at 4 °C on the first day. On the second day, tissues were rotated in 0.1% PAA for 2 hours at room temperature. Then two cycles of 15 minutes' sterile PBS and ddH<sub>2</sub>O washes were applied.

#### DNA and RNA extraction from colon tissue

Up to 25 mg freshly frozen native and decellularized colon tissue were minced prior to DNA extraction using DNeasy Blood & Tissue Kit (Qiagen, Germantown, MD, USA). For RNA extraction, RNeasy Mini Kit (Qiagen, Germantown, MD, USA) was used following the dissociation of the tissue by TissueLyser LT (Qiagen, Germantown, MD, USA) with stainless steel beads (Qiagen, Germantown, MD, USA). DNA and RNA concentrations were determined using the ND-1000 UV/Vis Spectrophotometer (NanoDrop, Thermo Scientific).

#### Matrisome analysis of human intestinal decellularized tissue blocks

Matrisome analysis of primary human intestinal smooth muscle cells has been previously described by us[9] and the same protocols were used for the decellularized colon tissue cubes. In total, 30mg of decellularized tissues were digested in 8M urea Tris-HCl buffer for homogenization (Sigma, St. Louis, MO, USA). The process of LC-MS was previously described[4]. The samples were filtered using a 3K Amicon Ultra 0.5 mL centrifugal filter (Millipore, UFC500396), dried in a speedvac and reconstituted in 50 µL of 6M urea buffer. The protein sample was reduced with DTT and alkylated with iodoacetamide. The sample was digested by adding Trypsin/Lys-C Mix (Promega # V5071) to the sample at a 25:1 protein:protease ratio (w/w). The sample was mixed

and incubated for 3–4 hours at 37°C. The sample was then diluted 6-fold with 50mM Tris-HCl (pH 8) to reduce urea concentration to 1M or below. Digestion was continued overnight at 37°C. The digestion was terminated by adding trifluoroacetic acid (TFA) to a final concentration of 0.5–1%. The sample was desalted using a PepClean C18 spin column (Thermo Fisher Scientific, Waltham, MA, USA) and resuspended in 1% acetic acid to make up a final volume of ~30 µL for LC-MS analysis. The LC-MS system was a Thermo Scientific Fusion Lumos tribrid mass spectrometer system. The high-performance liquid chromatography column was a Dionex 15cm x75 µm id Acclaim Pepmap C18, 2µm, 100 Å reversed- phase capillary chromatography column. Five µL volumes of the extract were injected and the peptides eluted from the column by an acetonitrile/0.1% formic acid gradient at a flow rate of 0.3 µL/min were introduced into the source of the mass spectrometer on-line. The microelectrospray ion source is operated at 2.5 kV. Proteomics analysis was supported by the Cleveland Clinic proteomics core[9].

The digest of the decellularized tissue cubes was analyzed using the data dependent multitask capability of the instrument acquiring full scan mass spectra to determine peptide molecular weights and product ion spectra to determine amino acid sequence in successive instrument scans. CID/HCD spectra collected in the experiment were analyzed using Sequest search program (Proteome Discoverer 2.2), and compared with the human UniProtKB database to determine protein identities (FDR set to 1%). Label free quantitation (LFQ) intensities were determined using PD2.2, and used to calculate relative protein abundance (proportion). Systems levels analyses of proteomics data were conducted using open-access statistical programming language R (version 4.0.1), and specific packages including ggplot2 to create barplots (part of tidyverse), pheatmap to create heatmap, ggord and base R for PCA, venn and RVenn for creating venn diagrams. R Package dunn.test was used to conduct pairwise multiple comparisons of mean for different

datasets (Dunn's nonparametric all-pairs comparison test for Kruskal-type ranked data) with bonferroni correction of multiple P-values. For multiple comparisons, adjusted P-value < .05 was considered statistically significant.

#### Dextran sodium-sulfate induced colitis

Acute and chronic dextran sodium sulfate (DSS) colitis was induced as previously described by us [5, 10]. After a dose-finding for each mouse strain used, 3.5% DSS (35–50 000 kDa; MP Biomedicals, OH, USA) in drinking water of wildtype (WT) mice (6-8 weeks of age) for 10 days was chosen as optimal for the BALB/cJ mouse strain (Jackson laboratory, Bar Harbor, ME, USA). Milk fat globule-epidermal growth factor 8 (MFGE8) (R&D, Minneapolis, MN, USA) was administered as enema at a dose of 3,600 ng in 120  $\mu$ l (R&D, Minneapolis, MN, USA) via Argyle™ Polyurethane Umbilical Vessel Catheter (Covidien LLC, MA, USA) every four days. PBS was used as control. We performed acute DSS colitis with increasing doses of 400ng, 1,200ng and 3,600ng per mouse. Chronic experimental fibrosis was induced by 3.5% DSS in drinking water for 10-12 days followed by a recovery period of 10-14 days with normal tap water, and this was defined as one cycle of DSS[5, 11]. The DSS cycle was repeated twice. Control mice received normal drinking water throughout. In the preventive experiment, enemas of 3,600ng recombinant mouse MFGE8 (mrMFGE8) or PBS every four days was applied from the onset of the first DSS cycle. In the therapeutic experiment, the enema was started at the end of the second DSS cycle and administered all throughout the second recovery period. Clinical disease activity was determined every other day by measuring body weight loss, stool consistency and presence of occult or overt blood in the stools as previously described [5, 12, 13]. Animals were euthanized by CO<sub>2</sub> asphyxiation followed by cervical dislocation at the end of the experiment.



For the MFGE8 knockout (KO) experiments mice were kindly provided by Dr. Kamran Atabai (UCSF). Those mice were previously described[14]. After DSS dose finding experiments, chronic experimental fibrosis was induced by 3% DSS in drinking water for 6 days followed by a recovery period of 10-14 days with normal tap water, and this was defined as one cycle of DSS[5, 11]. The DSS cycle was repeated twice. Control mice received normal drinking water throughout. In the therapeutic experiment, enemas of 3,600ng rmMFGE8 or PBS every four days was applied at the end of the second DSS cycle and administered all throughout the second recovery period. KO mice were age-matched and were co-housed with their WT littermates and per genotype to minimize influence from differences in flora composition[15].

#### Trinitrobenzene sulfonic acid induced fibrosis

Chronic trinitrobenzene sulfonic acid (TNBS) induced colitis was induced as previously described [10, 16]. After a dose finding exercise, 1% TNBS (administered weekly intrarectally to wildtype (WT) mice (6-8 weeks of age) for 4 weeks was chosen as optimal for the BALB/cByJ mouse strain (Jackson laboratory, Bar Harbor, ME, USA). Milk fat globule-epidermal growth factor 8 (MFGE8) (R&D systems, MN, USA at a dose of 3,600 ng) and/or FAK-inhibitor (Y15, Sigma, St. Louis, MO; 10 mg/kg) was administered as enema in 120  $\mu$ l via Argyle™ Polyurethane Umbilical Vessel Catheter (Covidien LLC, MA, USA). Control mice received 45% ethanol/PBS only intrarectally weekly. Enemas of 3,600ng recombinant mouse MFGE8 (mrMFGE8) and/or FAK inhibitor were applied every four days from the onset of the first TNBS cycle. Clinical disease activity was determined every other day by measuring body weight loss, stool consistency and presence of occult or overt blood in the stools as previously described [5, 12, 13]. Animals were euthanized by CO<sub>2</sub> asphyxiation followed by cervical dislocation at the end of the experiment.

### Endpoints for DSS and TNBS induced colitis experiments

The endpoint and data collection of DSS and TNBS-induced colitis experiment has been previously described. Body weights, stool consistency and occult blood or the presence of gross blood per rectum were recorded every other day[5, 12]. Two investigators blinded to the protocol independently assessed the clinical score as previously described[12]. Briefly, weight loss of 1–5%, 5–10%, 10–20%, and >20% was scored as 1, 2, 3, and 4, respectively. For stool consistency, 0 was scored for well-formed pellets, 2 for pasty and semiformal stools, which did not stick to the anus, and 4 for liquid stools that remained adhesive to the anus. Bleeding was scored 0 for no blood in hemocult, 2 for positive hemocult, and 4 for gross bleeding from the rectum. Weight, stool consistency, and bleeding sub-scores were added and divided by 3, resulting in a total clinical score ranging from 0 (healthy) to 4 (maximal activity of colitis). At the end of the experiment animals were euthanized by CO<sub>2</sub> asphyxiation followed by cervical dislocation. The entire colon was removed, cleaned, weighted and measured from the ileocaecal junction to the anus. Tissue was procured from the descending colon. Histology was performed on paraffin embedded, 3 µm-thick transverse sections stained with hematoxylin and eosin, masson trichrome or Sirius red. Slides were scored by an experienced pathologist (IOG or SH) blinded to the experimental groups using one score for inflammation and one for fibrosis as previously described [5]. Briefly, inflammation scoring was performed using hematoxylin & eosin (H&E) slides based on inflammation infiltration (0-3), extent of inflammation (0-3), crypt damage (0-4) and percentage of involved area (0-4). Fibrosis scoring was evaluated using masson trichrome (MT) slides on the whole tissue rings, ranging from 0 to 3. Images were acquired using an Olympus microscope and ImagePro software. Sirius red images were quantified using ImageJ software (Bethesda, MD).

Starting with a non-diseased control slide, threshold was set using the submucosa of a no DSS or no TNBS wildtype animal and remained the same for all following slides and integrated density was measured. The thickness of the intestinal wall layers was calculated as the mean value of four different points per mouse on well oriented cross sections using ImageJ (Bethesda, MD).

#### Next generation RNA sequencing analysis

RNA was extracted from normal control (NL) (n=4) and Crohn's disease strictured (CDs) (n=3) HIMFs stimulated by recombinant human MFGE8 (rhMFGE8) and PBS. Total RNA was extracted from cells using the RNeasy Mini Kit (Qiagen, Germany). RNA quality was assessed using the Agilent bioanalyzer and samples with RNA quality (RIN) score of >9.0 were used for RNA-sequencing. RNA concentrations were determined using Qubit® 3.0 Fluorometer (Invitrogen, Life Technologies). RNA-sequencing libraries were generated using Illumina TruSeq kits following the manufacturer's protocol and libraries were sequenced using an Illumina NovaSeq 6000 following Illumina reagents and protocols. Paired-ended 100 base pair reads were trimmed with Trim Galore! (v.0.4.4) and checked for quality with FastQC (v0.11.7) (<http://www.bioinformatics.babraham.ac.uk/projects>) before alignment to the human genome (GRCh38.p13). Reads were aligned using Rsubread package. Overall, an average of 98.0% of reads aligned uniquely. Gene counts were determined by the number of uniquely aligned, unambiguous reads (Subread: featureCounts, v1.5.2) and annotated (GRCH38, Ensembl 99 release). On average, 70% of reads in each sample were successfully assigned. Raw counts were loaded into R (v3.6.2 and 4.1.2), and subsequent analyses were performed using the packages described below. Counts were filtered to exclude transcripts that were expressed at low levels (counts per million reads mapped [CPM] < 1) before performing differential expression (DE) analysis using R packages *DESeq2*, *edgeR* and *Limma*. Differentially expressed genes (DEGs)

were identify using different statistical RNAseq analysis workflows based on Reads Per Kilobase of transcript, per Million mapped reads (RPKM) and Fragments Per Kilobase of transcript, per Million mapped reads (FPKM) values. DEGs with Benjamini-Hochberg adjusted p-value < 0.05 was considered statistically significant. Volcano plots were created using R package *EnhancedVolcano*. Functional analysis of significant DEGs were performed using R package *clusterProfiler* (v3.14.3) to identify and plot enriched Gene Ontology terms and KEGG pathways. Enrichment plots were created using EnrichmentMap app in Cytoscape (ver 3.8.2, <https://cytoscape.org/>). Other plots were made using in-house R scripts (available upon request). RNA sequencing data is in the process of being deposited in Gene Expression Omnibus (GEO).

#### Focal adhesion kinase pathway inhibition

In select experiments, HIMFs were seeded in 6-well or 24-well plates overnight, serum deprived and treated with 10 $\mu$ M focal adhesion kinase (FAK) phosphorylation small molecular inhibitor (Sigma, St. Louis, MO, USA) or vehicle for 1 hour. Subsequently, cells were stimulated with rhMFGES8 (R&D, Minneapolis, MN, USA) or vehicle.

#### RNA interference

HIMFs were transfected with ITGAV (for integrin  $\alpha$ v) and ITGB5 (for integrin  $\beta$ 5) small interfering RNA (siRNA) (Horizon Discovery, Cambridge, United Kingdom) and their respective scrambled siRNA using lipofectamine 2000 (Thermo Fisher Scientific, Waltham, MA, USA). The siRNAs are pooled nucleotides with different sequences for each target in the same solution. HIMFs were seeded in 6-well or 24-well plates and cultured overnight. Cell culture medium was removed and replaced with opti-MEM (Thermo Fisher Scientific, Waltham, MA, USA) as well as

lipofectamine 2000 and siRNA mixture per manufacturers recommendations. Subsequently, the media was replaced with HIMF culture media with no serum prior to the experiments.

#### Migration assay

Migration assays were performed in the modified 48-well Boyden chamber (Neuro Probe, Gaithersburg, MD, USA) as described previously by us[17]. A polycarbonate filter (12 µm pore size, polyvinylpyrrolidone-free; Gerbu Biotechnik, Germany) divided the chamber into an upper and a lower compartment. HIMFs were pretreated with a series of concentrations of MFGE8 (0ng/ml, 100ng/ml, 250ng/ml and 500ng/ml for overnight before the migration assay. 25ug/ml fibronectin (FN) were set up in the lower chambers. Twenty thousand HIMF per well in DMEM with 1% bovine serum albumin (BSA) were seeded into the wells of the upper compartment of the Boyden chamber and incubated at 37°C in 5 % CO<sub>2</sub> atmosphere for 6 hours. The filter was removed from the chamber, and the non-migrated cells on the upper side of the filter were scraped off with a rubber policeman. Migrated cells on the lower side of the filter were fixed and stained with Vectashield mounting medium with DAPI (Vector Laboratories, Burlingame, CA) and automatically counted at a 100-fold magnification and quantified using ImagePro (Media Cybernetics). The total sample size for each individual experiment consisted of at least 3 replicate migration assays. Each experiment was repeated at least 3 times.

#### Cell Proliferation Assay

A total of 15,000 HIMF/well were seeded onto 24-well plates (Corning), and proliferation assays performed as previously described[18]. Briefly, cells were incubated with rhMFGE8 (100ng/ml, 250ng/ml or 500ng/ml) or PBS for 48 hours and their proliferative potential was evaluated by

measuring DNA synthesis by thymidine incorporation assay. Briefly, cells were incubated with <sup>3</sup>H-thymidine (1 µCi/ml; Amersham, Arlington Heights, IL) for 6 hours and washed twice with 5% (vol/vol) trichloroacetic acid before fixation. DNA was precipitated using 0.5 N NaOH, and supernatants were quantified in a γ-counter using basic fibroblast growth factor (bFGF) (10 ng/ml) as positive control.

#### Quantitative reverse transcriptase polymerase chain reaction procedure

Total RNA was isolated as described previously (RNAEasy Miniprep kit, Qiagen, Germantown, MD, USA)[19], and reverse transcription and quantitative PCR performed according to manufacturer's instructions (Applied Biosystems, Foster City, CA, USA) and as described previously by us[5]. The products for all primer pairs were verified by sequencing and relative differences were calculated using the comparative threshold cycle method (ddCt) by normalizing to CT values of glyceraldehyde 3-phosphate dehydrogenase (GAPDH) (reference gene). Quantitative RT-PCR was performed on cDNA (synthesized with iScript cDNA Synthesis Kit, Biorad, Hercules, CA, USA) with iQ Sybr Green Supermix (Biorad, Hercules, CA, USA) and gene specific primers. GAPDH was used as the reference gene and the Pfaffl method was used to calculate fold changes in treated versus untreated samples[20]. The primer pairs used for gene expression analysis are summarized in [Table S5](#).

#### Immunofluorescence

The method for immunofluorescence (IF) was adapted from a previously reported method[4]. For the staining of colon tissue, the formalin fixed paraffin embedded (FFPE) slides were deparaffinized using the following protocol: Clear Rite (Thermo Fisher Scientific, Waltham, MA,

USA) for 3 min, Clear Rite for 3 min, Flex 100 (Thermo Fisher Scientific, Waltham, MA, USA) for 1 min, Flex 100 for 2 min, Flex 95 (Thermo Fisher Scientific, Waltham, MA, USA) for 1 min and Flex 95 for 2 min. Then the slides were washed with ddH<sub>2</sub>O for 1 min before being incubated with target retrieval solution pH 6 (Dako Denmark, Glostrup, Denmark) at 95°C water bath for 30 min. After that slides were cooled down to room temperature before blocking. For the staining of HIMFs, cells were seeded onto 3-well chamber slides (IBIDI GMBH, Martinsried, Germany). After treatment with MFGE8 or PBS for 48 hours, slides were rinsed in PBS and fixed with 4% paraformaldehyde at room temperature for 10 minutes and 0.5% Triton-X for 5 min. Both tissue and HIMF slides were blocked with 3% FBS in PBS before the application of the primary antibody. All primary and secondary antibodies were diluted in 3% FBS. The primary antibodies were collagen I (COLI) antibody (Rockland, Limerick, PA, USA), collagen III (COLIII) antibody (Rockland, Limerick, PA, USA), FN antibody (BD Biosciences, San Jose, CA, USA), MFGE8 antibody (Abcam, Cambridge, MA, USA) and integrin  $\alpha$ v $\beta$ 5 antibody (Abcam, Cambridge, MA, USA) at a dilution of 1:100. After overnight incubation with the primary antibody at 4°C, slides were rinsed three times with PBS and the AlexaFluor 488 secondary antibody (Molecular Probes, Eugene, OR, USA) was added at a dilution 1:500 for 1 hour at 37°C. F-actin was stained by fluorescein phalloidin (Thermo Fisher Scientific, Waltham, MA, USA), which did not require the conjugation of fluorescent secondary antibody. For nuclear counterstaining Vectashield mounting medium with DAPI (Vector Laboratories, Burlingame, CA, USA) was used. After staining, the Leica DM5500B microscope (Leica, Wetzlar, Germany) or Olympus IX71 microscope (Olympus Scientific Solutions Technologies Inc, Waltham, MA, USA) were used to capture images. The secondary antibody controls for the entire publication can be found in [Figure S13](#).

### Immunoblotting

Protein extraction was performed using a RIPA lysis buffer containing 50 mM TRIS pH 7.5, 150 mM NaCl, 1% Triton X-100, 0.1% SDS, 1% Na-deoxycholate and 1% protease and phosphatase inhibitor cocktail (Sigma, St. Louis, MO, USA) as previously described by us[4, 5]. The concentration of proteins in each lysate was measured using the Bio-Rad protein assay (Bio-Rad Laboratories, Hercules, CA, USA) according to manufacturer's recommendations. Immunoblotting was performed as previously described[5]. Equivalent amounts of proteins (10  $\mu$ g) were separated using SDS-PAGE on a 10% Tris-glycine gel and transferred to a PVDF membrane (Millipore, Billerica, MA, USA). Nonspecific binding was blocked by incubation with 5% milk or BSA in 0.1% Tween 20/Tris-buffered saline (Thermo Fisher Scientific, Waltham, MA, USA) for 30 min., followed by overnight incubation at 4°C with the primary antibody(s). The following antibodies were used: GAPDH (Trevigen, Gaithersburg, MD, USA) at 1:2000,  $\alpha$ -smooth muscle actin ( $\alpha$ -SMA) (Sigma, St. Louis, MO, USA) at 1:1000, FN (BD Biosciences, San Jose, CA, USA) at 1:1000, phospho-FAK (p-FAK) (Cell Signaling, Danvers, Massachusetts, USA) at 1:500, FAK (Cell Signaling, Danvers, Massachusetts, USA) at 1:500, integrin  $\alpha$ v (Abcam, Cambridge, MA, USA) at 1:1000, integrin  $\beta$ 5 (Abcam, Cambridge, MA, USA) at 1:1000, E-cadherin (Abcam, Cambridge, MA, USA) at 1:1000, cytokeratin-19 (Novus, Centennial, CO) at 1:1000, vimentin (Abcam, Cambridge, MA, USA) at 1:1000,  $\beta$ -tubulin (Cell Signaling, Danvers, Massachusetts, USA) at 1:1000 and phosphatase and tensin homolog (PTEN) (Cell Signaling, Danvers, Massachusetts, USA) at 1:1000. Membranes were washed 6 times with 0.1% Tween 20/Tris-buffered saline, incubated with the appropriate horseradish peroxidase-conjugated secondary antibody (Sigma, St. Louis, MO, USA), washed again, and incubated with the



chemiluminescent substrate (Super Signal; Pierce, Rockford, IL, USA) for 5 minutes, after which they were exposed to film (Kodak).

### Immunohistochemistry

Immunohistochemistry (IHC) staining was performed using the Discovery ULTRA automated stainer from Roche Diagnostics (Indianapolis, IN, USA). In brief, antigen retrieval was performed using a tris/borate/ethylenediaminetetraacetic acid (EDTA) buffer (Discovery CC1, 06414575001; Roche, South San Francisco, CA, USA), pH 8.0 to 8.5. MFGE8 antibody (Abcam, Cambridge, MA, USA) at 1:300, COL1 antibody (Abcam, Cambridge, MA, USA) at 1:75,  $\alpha$ SMA antibody (Sigma, St. Louis, MO, USA) at 1:100 or FN antibody (BD Biosciences, San Jose, CA, USA) at 1:100 for 0.5 to 1 hour incubation at room temperature were used. The antibodies were visualized using the OmniMap anti-rabbit or anti-mouse HRP (Roche, South San Francisco, CA, USA) in conjunction with the ChromoMap DAB detection kit (Roche, South San Francisco, CA, USA). Lastly, the slides were counterstained with hematoxylin and bluing. Antibodies were diluted with Van Gogh Yellow Diluent (BioCare Medical, Pacheco, CA, USA). The Olympus CX31 microscope (Olympus Scientific Solutions Technologies Inc, Waltham, MA, USA) was used to capture the images. For the quantification of MFGE8 expression within human intestinal tissues, the images of the slides were blindly reviewed by two independent researchers. Scores from 0-4 (0: no expression; 4: highest expression) were assigned according to the expression of MFGE8 in the epithelium and submucosa. In case of discrepancy the two researchers discussed the results jointly and if discrepancies persisted they were resolved by I.O.G. We additionally automatically quantified the expression of MFGE8, Col I, FN and  $\alpha$ SMA on IHC using QuPath for determination of the percent area positive in three regions of interest in the submucosa for each tissue section.

### HT29 stimulation experiments

HT29 cells ( $1 \times 10^5$  cells/well) were seeded in 12-well plate overnight. Then HT29 cells were stimulated with 10ng/ml IL-1 $\beta$ , 10ng/ml TNF, 10ng/ml TGF- $\beta$ 1 (all Peprotech), or 500ng/ml LPS (Sigma) in serum-free DMEM medium for 24 hours. Supernatant were collected, centrifuged and stored at -80°C until use.

### Cytokine cytometric bead array

We analyzed cell culture supernatants with the BD Cytometric Bead Array Human Soluble Protein Master Buffer Kit (BD Biosciences, San Jose, CA, USA). This kit is able to detect IL-1 $\beta$ , IL-6, IL-8, IL-10, IL-12, TNF, MCP-1, TGF- $\beta$ 1, IFN $\gamma$  and RANTES and was performed following manufacturer's instructions.

### Enzyme-linked immunosorbent assay

The FN concentration in HIMF supernatant and the MFGE8 concentration in HT-29 supernatants was measured using a commercially available enzyme-linked immunosorbent assay (ELISA; Abcam or R&D Systems, respectively) according to the manufacture's protocol.

### Extracellular matrix deposition assay for human intestinal myofibroblasts

Deposition of ECM by intestinal myofibroblasts was assayed using modification of a method described previously [21, 22, 23]. Briefly, cells were plated into 96-well dark walled imaging plates (Greiner) in Dulbecco's modified Eagle medium (DMEM) supplemented with 10% fetal bovine serum (FBS) and antibiotics (described above), and allowed to grow and produce ECM for 5 days. Cells were removed using 0.25 M ammonium hydroxide in 50 mM Tris pH 7.4, and the

deposited ECM was fixed by exposure to 100% methanol at  $-20^{\circ}\text{C}$ . Fixed ECM was stained with Alexa Fluor488-conjugated anti-fibronectin (EBioscience, clone FN-3, 1:500 dilution), Alexa Fluor594-conjugated (Invitrogen, 1:1000 dilution) and anti-COLI/III antibodies (EMD, Millipore Corp. 1:100 dilution). Fluorescence intensities were obtained by scanning the plates with ECM using Cytation5 scanner. Fluorescence intensities of at least three replicate wells were used to determine the mean ECM levels in an experiment.

## SUPPLEMENTARY FIGURE LEGENDS

**Figure S1. Protocol schematic for decellularization of intestinal resection tissue using sodium dodecyl sulfate (SDS), sodium deoxycholate (SDC) or peracetic acid (PAA) based methods.** Abbreviations: Hank's balanced salt solution (HBSS); Penicillin, Streptomycin, Fungizone (PSF); Room temperature (RT); Phosphate buffered saline (PBS)

**Figure S2. Decellularization of colon tissue from inflammatory bowel disease patients and controls: Hematoxylin & Eosin (H&E) as well as Masson Trichrome (MT) staining.** Colon tissue processed by sodium dodecyl sulfate (SDS), sodium deoxycholate (SDC) or peracetic acid (PAA) based decellularization protocols compared to native tissue. Depicted are the gross appearance as well as H&E and MT staining separately for each tissue layer. All three protocols preserved the tissue architecture compared to native tissue. Scalebar = 50µm. Slides representative for n=7.

**Figure S3. Decellularization of colon tissue from inflammatory bowel disease patients and controls: Extracellular matrix (ECM) protein expression.** (A) Immunofluorescent staining of colon tissues processed by sodium dodecyl sulfate (SDS), sodium deoxycholate (SDC) or peracetic acid (PAA) based decellularization protocols compared to native tissue. Immunofluorescent staining for collagen I (COLI), III and fibronectin (FN). Major ECM molecules remain in the decellularized tissue segments. Scalebar = 100µm. Slides representative for n=8. (B) Principal component analysis (PCA) of the three decellularization protocols considering the top 500 proteins identified in an ulcerative colitis (UC) and Crohn's disease (CD) sample. Each dot in the PCA plot

represents a sample, with different colors representing the different decellularization protocols. The results reveal the strongest separation between native tissue and the decellularized samples for the SDC based protocol. (C) Fold change of the top 11 matrisome proteins in decellularized tissue compared to native tissue in the three different decellularization protocols, relative to the original untreated sample. Overall the relative contribution of ECM molecules to the total pool of proteins increased after decellularization. The strongest relative increases for the top expressed ECM molecules were noted in the SDC protocol. PPA, peracetic acid; SDC, sodium deoxycholate; SDS, sodium dodecyl sulfate.

**Figure S4. Decellularization of colon tissue from inflammatory bowel disease patients and controls: DNA and RNA amount, housekeeping gene expression, F-actin staining and re-seeding.** (A-D) DNA content (A), RNA content (B), housekeeping gene expression (C), and F-actin staining with phalloidin (D) in colon tissues processed by sodium dodecyl sulfate (SDS), sodium deoxycholate (SDC) or peracetic acid (PAA) based decellularization protocols compared to native tissue. (E) Immunoblot of housekeeping and typical cellular proteins in colon tissues with or without SDC, sodium dodecyl sulfate (SDS) or PAA based decellularization treatment (n=3). (F) Immunofluorescence for vimentin after re-seeding of SDC based decellularized tissue section with primary human intestinal myofibroblasts (HIMF). HIMF populated and aligned with the decellularized extracellular matrix (ECM) (representative for n=3). \*\*\*\*\*,  $p < 0.0001$ .

**Figure S5. Milk fat globule-epidermal growth factor 8 (MFGE8) expression and secretion in intestinal epithelial cells.** (A) Immunoblot analysis of MFGE8 in normal (NL) and CD stricture (CDs) primary human intestinal epithelial washes. MFGE8 was increased in CDs epithelial cells

compared to NL (n=12 technical replicates of a total of n=4 patient samples). (B) HT29 intestinal epithelial cells were exposed to interleukin (IL)-1 $\beta$ , tumor necrosis factor (TNF), transforming growth factor (TGF)- $\beta$ 1, lipopolysaccharide (LPS) or left untreated (Unt) for 24h and supernatants collected for MFGE8 detection via ELISA. IL-1 $\beta$  increased and TNF, TGF- $\beta$ 1, LPS decreased MFGE8 secretion compared to untreated. N=3 per group. \*, p<0.05; \*\*\*\*, p<0.001.

**Figure S6. Milk fat globule-epidermal growth factor 8 (MFGE8) expression in intestinal resection tissues from normal control (NL) and Crohn's disease stricture (CDs) tissues.**

Immunofluorescence (IF) for MFGE8 focusing on the mucosa and submucosa separately confirms epithelial cells as the major source of MFGE8 and increased expression in CDs compared to NL in mucosa and submucosa. MFGE8 was found near  $\alpha$ -SMA positive cells (myofibroblasts and vascular smooth muscle cells) as marked by white arrows. Slides are representative of n=8.

**Figure S7. Milk fat globule-epidermal growth factor 8 (MFGE8) in acute dextran sodium sulfate (DSS)-induced colitis.**

(A – D) Acute DSS colitis was induced in Balb/C mice by 3.5% DSS administration. 3,600ng of recombinant mouse milk fat globule-epidermal growth factor 8 (rmMFGE8) or vehicle control was applied as enema every four days starting from the first day of DSS administration. The severity of DSS induced colitis was evaluated by measuring (A) body weight loss and (B) calculating the clinical score consisting of blood in stool, weight loss and stool consistency. MFGE8 reduced the clinical score, but not weight loss in DSS treated animals. (C) Colon length was less reduced in MFGE8 treated and DSS exposed mice compared to DSS alone. (D) Inflammation score was determined by an inflammatory bowel disease (IBD) pathologist in a blinded fashion using Hematoxylin & eosin (H&E) sections. There was no difference in DSS

treated animal irrespective of exposure to MFGE8 or not. Data are presented as mean  $\pm$  SEM (n=5-9 per group from two independent experiments). \*, p<0.05, \*\*, p<0.01, \*\*\*\*, p<0.0001.

**Figure S8. Milk fat globule-epidermal growth factor 8 (MFGE8) exerts anti-fibrotic properties in chronic trinitrobenzene sulfonic acid (TNBS)-induced colitis.** (A to F) Chronic TNBS colitis was induced in Balb/C mice by weekly intrarectal administration of 1% TNBS for a total of 4 weeks. 3,600ng of recombinant mouse milk fat globule-epidermal growth factor 8 (MFGE8) and/or 10 mg/kg Y15 (focal adhesion kinase inhibitor (FAKi)) were applied as enema every four days starting from the first day of TNBS administration. The severity of TNBS induced colitis was evaluated by measuring (A) body weight loss and (B) calculating the clinical score consisting of blood in stool, weight loss and stool consistency. No significant difference was noted between the groups. (C) Colon length was less reduced in MFGE8 and/or Y15 treated TNBS exposed mice compared to TNBS alone. (D) Representative images from mouse colon sections stained with Hematoxylin & eosin (H&E), Masson's trichrome (MT), sirius red (SR), or collagen I (COLI). Slides are representative of n=8 per group. Arrows point towards the area of fibrosis. (E) Inflammation score was determined by an IBD pathologist in a blinded fashion using H&E sections. There was no difference in TNBS treated animal irrespective of exposure to MFGE8 and/or Y15 or vehicle only. Fibrosis score as determined by an IBD pathologist in a blinded fashion using MT sections or SR positive area was analyzed. MFGE8 or MFGE8&Y15 reduced the fibrosis score. SR surface area in TNBS exposed animals was reduced in MFGE8 and Y15 but not in MFGE8&Y15 treated animals compared to TNBS only. The combination of MFGE8&Y15 did not lead to less fibrosis compared to MFGE8 alone. (F) Neither MFGE8, nor Y15 reduced the thickness of the submucosa, muscularis mucosa and muscularis propria in TNBS exposed animals.

Data are presented as mean  $\pm$  SEM (n=8 per group from two independent experiments). \*, p<0.05, \*\*, p<0.01, \*\*\*, p<0.001, \*\*\*\*, p<0.0001.

**Figure S9. Milk fat globule-epidermal growth factor 8 (MFGE8) reduces IL-6, but not IL-8 or MCP-1 in supernatants normal control primary human intestinal myofibroblasts (NL HIMF).** NL HIMF were exposed to MFGE8 or vehicle for 48 and supernatants collected for a cytokine bead array assay (n=3 per group). (A) Absolute concentrations IL-6, IL-8 and MCP-1 are depicted. (B) Relative concentrations to untreated are depicted for IL-6, IL-8 and MCP-1.

**Figure S10. Milk fat globule-epidermal growth factor 8 (MFGE8) does not influence migration or proliferation in normal control primary human intestinal myofibroblasts (NL HIMF).** (A) NL HIMF were exposed to different concentrations of MFGE8 as the chemoattractant in the lower well of the Boyden chamber. MFGE8 did not influence the migration of NL HIMF (n=4). (B) NL HIMF were exposed to different concentrations of MFGE8 in the 3H-thymidine proliferation assay. MFGE8 did not influence proliferation of NL HIMF. Basic fibroblast growth factor (bFGF) was used as a positive control (n=3). \*, p<0.05, \*\*, P<0.01

**Figure S11. Knockdown efficiency of small interfering RNA (siRNA) for integrin  $\alpha$ v and  $\beta$ 5 in normal control primary human intestinal myofibroblasts (NL HIMF).** NL HIMF were transfected with siRNA using lipofectamine 2000 and optimal conditions were determined. Immunoblot analysis indicates robust knockdown of the proteins of interest. N=3. \*\*, p<0.01, \*\*\*, p<0.001.



**Figure S12. Milk fat globule-epidermal growth factor 8 (MFGE8) does not reduce cytokine concentrations in supernatants of Crohn's disease (CD) lamina propria mononuclear cells (LPMC).** CD LPMC were freshly isolated and exposed to MFGE8 in three different concentrations or left untreated for 24 hours and supernatants collected for a cytokine bead array assay (n=4 replicates per group). (A) Absolute concentrations of the measured cytokines are depicted. There was no difference in cytokine secretion by LPMC regardless of the MFGE8 concentration used.

**Figure S13. Isotype controls**

To keep the main figures manageable, we added the secondary antibody isotype controls for each of the immunofluorescence images to this figure. The isotype controls are labelled per corresponding figure panel.

## SUPPLEMENTARY TABLES

Table S1. Patient demographics

|                                                                                                | Combined<br>(n=26) | Controls<br>(n=5) | Crohn's<br>disease<br>(n=11) | Ulcerative<br>colitis<br>(n=10) |
|------------------------------------------------------------------------------------------------|--------------------|-------------------|------------------------------|---------------------------------|
| <b>Gender</b>                                                                                  |                    |                   |                              |                                 |
| Female, n (%)                                                                                  | 11 (42)            | 5 (100)           | 1 (9)                        | 5 (50)                          |
| <b>Age at time of surgery, mean <math>\pm</math> SD</b>                                        | 43 $\pm$ 17.5      | 46 $\pm$ 11       | 44 $\pm$ 20                  | 41 $\pm$ 17                     |
| <b>Surgical indication, n (%)</b>                                                              |                    |                   |                              |                                 |
| Chronic diverticulitis                                                                         | 1 (4)              | 1 (20)            | 0 (0)                        | 0 (0)                           |
| Refractory constipation                                                                        | 4 (16)             | 4 (80)            | 0 (0)                        | 0 (0)                           |
| Crohn's disease complications                                                                  | 11 (42)            | 0 (0)             | 11 (100)                     | 0 (0)                           |
| Refractory ulcerative colitis                                                                  | 10 (38)            | 0 (0)             | 0 (0)                        | 10 (100)                        |
| <b>Disease location, n (%)</b>                                                                 |                    |                   |                              |                                 |
| Colon                                                                                          | 15 (58)            | 5 (100)           | 0 (0)                        | 10 (100)                        |
| Ileum                                                                                          | 6 (23)             | 0 (0)             | 6 (55)                       | 0 (0)                           |
| Ileocolonic                                                                                    | 5 (19)             | 0 (0)             | 5 (45)                       | 0 (0)                           |
| <b>Location of resection, n (%)</b>                                                            |                    |                   |                              |                                 |
| Ileocecal                                                                                      | 11 (42)            | 0 (0)             | 11 (100)                     | 0 (0)                           |
| Hemicolectomy                                                                                  | 1 (4)              | 1 (20)            | 0 (0)                        | 0 (0)                           |
| Total colectomy                                                                                | 14 (54)            | 4 (80)            | 0 (0)                        | 10 (100)                        |
| <b>Type of biologic or small molecule at any time prior to resection, n (%), non-exclusive</b> |                    |                   |                              |                                 |
| Anti TNF                                                                                       | 16 (62)            | 0 (0)             | 7 (64)                       | 9 (90)                          |
| Anti integrins                                                                                 | 7 (27)             | 0 (0)             | 4 (36)                       | 3 (30)                          |
| Anti IL12/23                                                                                   | 3 (12)             | 0 (0)             | 3 (27)                       | 0 (0)                           |
| Small molecules                                                                                | 3 (12)             | 0 (0)             | 1 (9)                        | 2 (20)                          |
| <b>Type of biologic or small molecule at time of resection, n (%)</b>                          |                    |                   |                              |                                 |
| Anti TNF                                                                                       | 2 (8)              | 0 (0)             | 2 (18)                       | 0 (0)                           |
| Anti integrins                                                                                 | 2 (8)              | 0 (0)             | 2 (18)                       | 0 (0)                           |
| Anti IL12/23                                                                                   | 1 (4)              | 0 (0)             | 1 (9)                        | 0 (0)                           |
| Small molecules                                                                                | 0 (0)              | 0 (0)             | 0 (0)                        | 0 (0)                           |

**Table S2. Pathways enriched in primary human intestinal myofibroblasts from normal tissue exposed to MFGE8, compared to untreated control**

| Description                                                                                           | Category              | FDR value | Term name  | Term Size | Intersection Size |
|-------------------------------------------------------------------------------------------------------|-----------------------|-----------|------------|-----------|-------------------|
| Mixed, incl. interferon alpha/beta signaling, and negative regulators of ddx58/ifih1 signaling        | STRING Clusters       | 2.98E-52  | CL:19382   | 67        | 35                |
| Mixed, incl. interferon alpha/beta signaling, and negative regulation of type i interferon production | STRING Clusters       | 7.40E-52  | CL:19379   | 83        | 36                |
| Interferon alpha/beta signaling, and Negative regulators of DDX58/IFIH1 signaling                     | STRING Clusters       | 5.67E-50  | CL:19385   | 61        | 33                |
| Interferon alpha/beta signaling, and ISG15-protein conjugation                                        | STRING Clusters       | 6.25E-48  | CL:19389   | 42        | 30                |
| Interferon alpha/beta signaling, and ISG15-protein conjugation                                        | STRING Clusters       | 2.45E-45  | CL:19391   | 36        | 28                |
| Antiviral defense                                                                                     | UniProt Keywords      | 3.31E-31  | KW-0051    | 127       | 27                |
| Response to virus                                                                                     | GO Biological Process | 7.49E-31  | GO:0009615 | 293       | 34                |
| Defense response to virus                                                                             | GO Biological Process | 7.49E-31  | GO:0051607 | 210       | 31                |
| Interferon alpha/beta signaling                                                                       | Reactome Pathways     | 8.73E-28  | HSA-909733 | 69        | 22                |
| Interferon Signaling                                                                                  | Reactome Pathways     | 8.73E-28  | HSA-913531 | 196       | 28                |
| Response to type i interferon                                                                         | GO Biological Process | 3.82E-27  | GO:0034340 | 72        | 22                |
| Interferon alpha/beta signaling                                                                       | STRING Clusters       | 8.52E-27  | CL:19394   | 21        | 17                |
| Microphthalmia with limb anomalies, and Interferon alpha/beta signaling                               | STRING Clusters       | 3.55E-26  | CL:19397   | 16        | 16                |
| Type i interferon signaling pathway                                                                   | GO Biological Process | 4.35E-26  | GO:0060337 | 67        | 21                |
| Response to other organism                                                                            | GO Biological Process | 1.08E-23  | GO:0051707 | 125       | 46                |
| Defense response to other organism                                                                    | GO Biological Process | 7.37E-21  | GO:0098542 | 900       | 38                |
| Innate immune response                                                                                | GO Biological Process | 4.76E-20  | GO:0045087 | 703       | 34                |

|                                                                                        |                   |       |           |     |    |
|----------------------------------------------------------------------------------------|-------------------|-------|-----------|-----|----|
|                                                                                        | UniProt           | 1.02E |           |     |    |
| Immunity                                                                               | Keywords          | -18   | KW-0391   | 522 | 29 |
|                                                                                        | GO Biological     | 2.04E | GO:000695 | 129 |    |
| Defense response                                                                       | Process           | -18   | 2         | 6   | 41 |
|                                                                                        | UniProt           | 5.80E |           |     |    |
| Innate immunity                                                                        | Keywords          | -18   | KW-0399   | 324 | 24 |
| Interspecies interaction between organisms                                             | GO Biological     | 1.32E | GO:004441 | 189 |    |
|                                                                                        | Process           | -17   | 9         | 9   | 47 |
|                                                                                        | GO Biological     | 1.58E | GO:000960 | 231 |    |
| Response to external stimulus                                                          | Process           | -17   | 5         | 0   | 51 |
| Mixed, incl. 2-5-oligoadenylate synthetase activity, and nephropathia epidemica        | STRING Clusters   | 1.78E |           |     |    |
|                                                                                        |                   | -17   | CL:19399  | 11  | 11 |
| Cytokine Signaling in Immune system                                                    | Reactome Pathways | 1.84E | HSA-      |     |    |
|                                                                                        |                   | -17   | 1280215   | 681 | 31 |
| Mixed, incl. isg15-protein conjugation, and interferon-induced protein 44 family       | STRING Clusters   | 5.61E |           |     |    |
|                                                                                        |                   | -17   | CL:19437  | 13  | 11 |
|                                                                                        | GO Biological     | 2.97E | GO:000695 | 158 |    |
| Immune response                                                                        | Process           | -16   | 5         | 8   | 42 |
| Negative regulation of viral genome replication                                        | GO Biological     | 1.98E | GO:004507 |     |    |
|                                                                                        | Process           | -15   | 1         | 61  | 14 |
|                                                                                        | GO Biological     | 1.12E | GO:000237 | 248 |    |
| Immune system process                                                                  | Process           | -14   | 6         | 1   | 49 |
|                                                                                        | GO Biological     | 2.12E | GO:001922 |     |    |
| Cytokine-mediated signaling pathway                                                    | Process           | -14   | 1         | 678 | 28 |
|                                                                                        | GO Biological     | 5.30E | GO:004852 |     |    |
| Negative regulation of viral process                                                   | Process           | -14   | 5         | 105 | 15 |
|                                                                                        | GO Biological     | 1.38E | GO:003409 | 110 |    |
| Response to cytokine                                                                   | Process           | -13   | 7         | 1   | 33 |
| Cellular response to cytokine stimulus                                                 | GO Biological     | 7.19E | GO:007134 | 101 |    |
|                                                                                        | Process           | -13   | 5         | 3   | 31 |
| Antiviral mechanism by IFN-stimulated genes                                            | Reactome Pathways | 1.34E | HSA-      |     |    |
|                                                                                        |                   | -12   | 1169410   | 81  | 13 |
|                                                                                        |                   | 3.27E |           |     |    |
| Immune response to tuberculosis                                                        | WikiPathways      | -11   | WP4197    | 23  | 9  |
|                                                                                        |                   | 3.27E |           |     |    |
| Type II interferon signaling (IFNG)                                                    | WikiPathways      | -11   | WP619     | 37  | 10 |
| SARS-CoV-2 innate immunity evasion and cell-specific immune response                   |                   | 5.93E |           |     |    |
|                                                                                        | WikiPathways      | -11   | WP5039    | 66  | 11 |
| Mixed, incl. interferon-induced protein 44 family, and receptor-transporting protein 4 | STRING Clusters   | 1.29E |           |     |    |
|                                                                                        |                   | -10   | CL:19438  | 7   | 7  |
|                                                                                        | KEGG              | 2.10E |           |     |    |
| Influenza A                                                                            | Pathways          | -10   | hsa05164  | 165 | 14 |

|                                                                                                                                               |               |       |           |     |    |
|-----------------------------------------------------------------------------------------------------------------------------------------------|---------------|-------|-----------|-----|----|
| Immune System                                                                                                                                 | Reactome      | 2.28E | HSA-      | 195 |    |
|                                                                                                                                               | Pathways      | -10   | 168256    | 6   | 38 |
| Response to interferon-gamma                                                                                                                  | GO Biological | 1.07E | GO:003434 |     |    |
|                                                                                                                                               | Process       | -09   | 1         | 182 | 14 |
| Interferon gamma signaling                                                                                                                    | Reactome      | 1.63E | HSA-      |     |    |
|                                                                                                                                               | Pathways      | -09   | 877300    | 88  | 11 |
| Type I interferon induction and signaling during SARS-CoV-2 infection                                                                         |               | 4.23E |           |     |    |
|                                                                                                                                               | WikiPathways  | -09   | WP4868    | 31  | 8  |
| Response to organic substance                                                                                                                 | GO Biological | 6.10E | GO:001003 | 301 |    |
|                                                                                                                                               | Process       | -09   | 3         | 1   | 45 |
| Hepatitis C                                                                                                                                   | KEGG          | 1.49E |           |     |    |
|                                                                                                                                               | Pathways      | -08   | hsa05160  | 156 | 12 |
| Cellular response to organic substance                                                                                                        | GO Biological | 1.64E | GO:007131 | 236 |    |
|                                                                                                                                               | Process       | -08   | 0         | 9   | 39 |
| Response to stress                                                                                                                            | GO Biological | 5.36E | GO:000695 | 348 |    |
|                                                                                                                                               | Process       | -08   | 0         | 5   | 47 |
| Cellular response to interferon-gamma                                                                                                         | GO Biological | 5.36E | GO:007134 |     |    |
|                                                                                                                                               | Process       | -08   | 6         | 161 | 12 |
| Interferon-gamma-mediated signaling pathway                                                                                                   | GO Biological | 1.38E | GO:006033 |     |    |
|                                                                                                                                               | Process       | -07   | 3         | 70  | 9  |
| ISG15 antiviral mechanism                                                                                                                     | Reactome      | 1.50E | HSA-      |     |    |
|                                                                                                                                               | Pathways      | -07   | 1169408   | 73  | 9  |
| Host-pathogen interaction of human coronaviruses - interferon induction                                                                       |               | 2.06E |           |     |    |
|                                                                                                                                               | WikiPathways  | -07   | WP4880    | 33  | 7  |
| Microphthalmia with limb anomalies Mixed, incl. 4fe-4s single cluster domain, and interferon-induced protein with tetratricopeptide repeats 3 |               | 2.39E | DOID:0060 |     |    |
|                                                                                                                                               | DISEASES      | -07   | 861       | 8   | 6  |
| Response to interferon-beta                                                                                                                   | STRING        | 3.50E |           |     |    |
|                                                                                                                                               | Clusters      | -07   | CL:19402  | 5   | 5  |
| Cellular response to chemical stimulus                                                                                                        | GO Biological | 4.04E | GO:003545 |     |    |
|                                                                                                                                               | Process       | -07   | 6         | 31  | 7  |
| Measles                                                                                                                                       | GO Biological | 4.58E | GO:007088 | 291 |    |
|                                                                                                                                               | Process       | -07   | 7         | 9   | 41 |
| OAS antiviral response                                                                                                                        | KEGG          | 6.84E |           |     |    |
|                                                                                                                                               | Pathways      | -07   | hsa05162  | 138 | 10 |
| Response to chemical                                                                                                                          | Reactome      | 1.96E | HSA-      |     |    |
|                                                                                                                                               | Pathways      | -06   | 8983711   | 9   | 5  |
| Cell surface receptor signaling pathway                                                                                                       | GO Biological | 2.12E | GO:004222 | 433 |    |
|                                                                                                                                               | Process       | -06   | 1         | 3   | 50 |
| NOD-like receptor signaling pathway                                                                                                           | GO Biological | 2.16E | GO:000716 | 232 |    |
|                                                                                                                                               | Process       | -06   | 6         | 5   | 35 |
|                                                                                                                                               | KEGG          | 4.12E |           |     |    |
|                                                                                                                                               | Pathways      | -06   | hsa04621  | 174 | 10 |

|                                                                     |                       |          |           |   |     |    |
|---------------------------------------------------------------------|-----------------------|----------|-----------|---|-----|----|
| Regulation of type i interferon production                          | GO Biological Process | 1.83E-05 | GO:003247 | 9 | 130 | 9  |
| Response to stimulus                                                | GO Biological Process | 2.32E-05 | GO:005089 | 6 | 804 | 70 |
| Double-stranded rna binding                                         | GO Molecular Function | 4.28E-05 | GO:000372 | 5 | 75  | 8  |
| Epstein-Barr virus infection                                        | KEGG Pathways         | 8.46E-05 | hsa05169  |   | 193 | 9  |
| RNA-binding                                                         | UniProt Keywords      | 1.00E-04 | KW-0694   |   | 670 | 16 |
| Regulation of response to biotic stimulus                           | GO Biological Process | 0.00011  | GO:000283 | 1 | 406 | 13 |
| Response to interferon-alpha                                        | GO Biological Process | 0.00011  | GO:003545 | 5 | 23  | 5  |
| Novel intracellular components of RIG-I-like receptor (RLR) pathway | WikiPathways          | 0.00014  | WP3865    |   | 59  | 6  |
| Regulation of ribonuclease activity                                 | GO Biological Process | 0.00016  | GO:006070 | 0 | 9   | 4  |
| RIG-I-like receptor signaling pathway                               | KEGG Pathways         | 0.00017  | hsa04622  |   | 70  | 6  |
| 2-5-oligoadenylate synthetase 1, domain 2, C-terminus               | Pfam                  | 0.00018  | PF10421   |   | 4   | 4  |
| Pathways of nucleic acid metabolism and innate immune sensing       | WikiPathways          | 0.00032  | WP4705    |   | 16  | 4  |
| Cytosolic DNA-sensing pathway                                       | WikiPathways          | 0.00033  | WP4655    |   | 73  | 6  |
| 2-5OAS/ClassI-CCAase, nucleotidyltransferase domain                 | InterPro Domains      | 0.00034  | IPR006116 |   | 4   | 4  |
| 2-5-oligoadenylate synthetase, C-terminal conserved site            | InterPro Domains      | 0.00034  | IPR006117 |   | 4   | 4  |
| 2-5-oligoadenylate synthetase 1, domain 2/C-terminal                | InterPro Domains      | 0.00034  | IPR018952 |   | 4   | 4  |
| 2-5-oligoadenylate synthase                                         | InterPro Domains      | 0.00034  | IPR026774 |   | 4   | 4  |
| 2-5-oligoadenylate synthetase, N-terminal conserved site            | InterPro Domains      | 0.00034  | IPR043518 |   | 4   | 4  |
| Response to bacterium                                               | GO Biological Process | 0.00049  | GO:000961 | 7 | 634 | 15 |
| Positive regulation of interferon-beta production                   | GO Biological Process | 0.00056  | GO:003272 | 8 | 34  | 5  |
| Regulation of defense response                                      | GO Biological Process | 0.00097  | GO:003134 | 7 | 674 | 15 |
| Toll-like receptor signaling pathway                                | KEGG Pathways         | 0.001    | hsa04620  |   | 101 | 6  |
| Regulation of immune system process                                 | GO Biological Process | 0.0012   | GO:000268 | 2 | 151 | 23 |

|                                                                           |                       |       |            |     |    |
|---------------------------------------------------------------------------|-----------------------|-------|------------|-----|----|
|                                                                           | KEGG                  | 0.001 |            |     |    |
| Cytosolic DNA-sensing pathway                                             | Pathways              | 2     | hsa04623   | 62  | 5  |
| DDX58/IFIH1-mediated induction of interferon-alpha/beta                   | Reactome Pathways     | 0.001 | HSA-168928 | 76  | 6  |
|                                                                           | GO Biological Process | 0.001 | GO:005077  |     |    |
| Regulation of immune response                                             |                       | 6     | 6          | 896 | 17 |
| Regulation of response to cytokine stimulus                               | GO Biological Process | 0.001 | GO:006075  |     |    |
|                                                                           |                       | 6     | 9          | 175 | 8  |
| Negative regulation of type i interferon production                       | GO Biological Process | 0.001 | GO:003248  |     |    |
|                                                                           |                       | 7     | 0          | 45  | 5  |
| Positive regulation of type i interferon production                       | GO Biological Process | 0.001 | GO:003248  |     |    |
|                                                                           |                       | 7     | 1          | 80  | 6  |
| Regulation of defense response to virus                                   | GO Biological Process | 0.001 | GO:005068  |     |    |
|                                                                           |                       | 7     | 8          | 81  | 6  |
|                                                                           | UniProt               | 0.001 |            | 502 |    |
| Cytoplasm                                                                 | Keywords              | 9     | KW-0963    | 8   | 47 |
|                                                                           |                       | 0.001 |            |     |    |
| Toll-like receptor signaling pathway SARS coronavirus and innate immunity | WikiPathways          | 9     | WP75       | 103 | 6  |
|                                                                           |                       | 0.002 |            |     |    |
|                                                                           | WikiPathways          | 3     | WP4912     | 31  | 4  |
|                                                                           | GO Biological Process | 0.002 | GO:003545  |     |    |
| Cellular response to interferon-beta                                      |                       | 5     | 8          | 22  | 4  |
|                                                                           | STRING                | 0.002 |            |     |    |
| CXCR3 chemokine receptor binding                                          | Clusters              | 8     | CL:18318   | 5   | 3  |
|                                                                           | STRING                | 0.002 |            |     |    |
| ISG15-protein conjugation                                                 | Clusters              | 8     | CL:19452   | 5   | 3  |
| RIG-I-like receptor, C-terminal regulatory domain                         | InterPro Domains      | 0.003 | IPR021673  | 3   | 3  |
|                                                                           |                       | 2     |            |     |    |
| P-loop containing nucleoside triphosphate hydrolase                       | InterPro Domains      | 0.003 | IPR027417  | 861 | 17 |
|                                                                           |                       | 2     |            |     |    |
| RIG-I-like receptor, C-terminal domain superfamily                        | InterPro Domains      | 0.003 | IPR038557  | 3   | 3  |
|                                                                           |                       | 2     |            |     |    |
| RIG-I receptor, C-terminal                                                | InterPro Domains      | 0.003 | IPR041204  | 3   | 3  |
|                                                                           |                       | 2     |            |     |    |
| Non-genomic actions of 1,25 dihydroxyvitamin D3                           | WikiPathways          | 2     | WP4341     | 71  | 5  |
|                                                                           | COMPARTM              | 0.003 | GOCC:009   |     |    |
| Interferon regulatory factor complex                                      | ENTS                  | 8     | 7071       | 13  | 4  |
| Positive regulation of interferon-alpha production                        | GO Biological Process | 0.004 | GO:003272  |     |    |
|                                                                           |                       | 3     | 7          | 26  | 4  |
|                                                                           | GO Molecular Function | 0.004 | GO:000173  |     |    |
| 2-5-oligoadenylate synthetase activity                                    |                       | 6     | 0          | 3   | 3  |
|                                                                           | GO Molecular Function | 0.004 | GO:000372  |     |    |
| RNA helicase activity                                                     |                       | 6     | 4          | 74  | 6  |
|                                                                           |                       | 0.004 |            |     |    |
| C-terminal domain of RIG-I                                                | Pfam                  | 9     | PF11648    | 3   | 3  |

|                                                                                 |                       |       |            |           |     |
|---------------------------------------------------------------------------------|-----------------------|-------|------------|-----------|-----|
| Single-stranded rna binding                                                     | GO Molecular Function | 0.005 | GO:000372  | 82        | 6   |
|                                                                                 |                       | 8     | 7          |           |     |
| CXCR3 chemokine receptor binding                                                | GO Molecular Function | 0.005 | GO:004824  | 5         | 3   |
| Regulation of toll-like receptor signaling pathway                              |                       | 0.006 |            |           |     |
| Cytoplasmic pattern recognition receptor signaling pathway in response to virus | WikiPathways          | 9     | WP1449     | 139       | 6   |
| Chemokine receptors bind chemokines                                             | GO Biological Process | 0.007 | GO:003952  | 9         | 3   |
| Viral protein interaction with cytokine and cytokine receptor                   | STRING Clusters       | 0.007 | CL:18276   | 28        | 4   |
|                                                                                 | KEGG Pathways         | 0.007 | 4          | hsa04061  | 96  |
| Nucleotidyltransferase superfamily                                              | InterPro Domains      | 0.008 | IPR043519  | 23        | 4   |
| Cellular response to virus                                                      | GO Biological Process | 0.008 | GO:009858  | 32        | 4   |
| Regulation of innate immune response                                            | GO Biological Process | 0.008 | GO:004508  | 301       | 9   |
| Negative regulators of DDX58/IFIH1 signaling                                    | Reactome Pathways     | 0.009 | HSA-936440 | 33        | 4   |
| Regulation of cytokine production                                               | GO Biological Process | 0.009 | GO:000181  | 742       | 14  |
| Polymerase, nucleotidyl transferase domain                                      | InterPro Domains      | 0.010 | 3          | IPR002934 | 7   |
| Guanylate-binding protein, C-terminal                                           | InterPro Domains      | 0.010 | 3          | IPR037684 | 7   |
| Human papillomavirus infection                                                  | KEGG Pathways         | 0.013 | 1          | hsa05165  | 325 |
|                                                                                 | UniProt Keywords      | 0.014 | 2          | KW-0347   | 140 |
| Helicase                                                                        | GO Biological Process | 0.014 | GO:005192  | 125       | 6   |
| Positive regulation of calcium ion transport                                    | InterPro Domains      | 0.015 | 9          | IPR001346 | 9   |
| Interferon regulatory factor DNA-binding domain                                 | InterPro Domains      | 0.015 | 9          | IPR003191 | 9   |
| Guanylate-binding protein/Atlastin, C-terminal                                  | InterPro Domains      | 0.015 | 9          | IPR003191 | 9   |
| Interferon regulatory factor, conserved site                                    | InterPro Domains      | 0.015 | 9          | IPR019817 | 9   |
| Cellular response to interferon-alpha                                           | GO Biological Process | 0.016 | GO:003545  | 13        | 3   |
|                                                                                 | SMART                 | 0.016 | 1          | 7         |     |
| Interferon regulatory factor                                                    | InterPro Domains      | 0.016 | 7          | SM00348   | 8   |
| Guanylate-binding protein, C-terminal domain superfamily                        | InterPro Domains      | 0.016 | 7          | IPR036543 | 10  |



|                                                     |                       |       |            |           |     |
|-----------------------------------------------------|-----------------------|-------|------------|-----------|-----|
| TRAF3-dependent IRF activation pathway              | Reactome Pathways     | 0.018 | HSA-918233 | 14        | 3   |
| Guanylate-binding protein, N-terminal               | InterPro Domains      | 0.02  | IPR015894  | 11        | 3   |
| GB1/RHD3-type guanine nucleotide-binding (G) domain | InterPro Domains      | 0.02  | IPR030386  | 11        | 3   |
| Regulation of response to external stimulus         | GO Biological Process | 0.020 | GO:003210  | 101       | 16  |
|                                                     |                       |       | 1          | 1         | 3   |
|                                                     | GO Molecular Function | 0.020 | GO:000016  | 211       | 26  |
| Nucleotide binding                                  |                       |       | 5          | 6         | 9   |
|                                                     | GO Molecular Function | 0.020 | GO:000548  | 125       | 26  |
| Binding                                             |                       |       | 5          | 8         | 16  |
|                                                     | GO Molecular Function | 0.020 | GO:001707  | 187       | 85  |
| Purine nucleotide binding                           |                       |       | 5          | 6         | 8   |
| Purine ribonucleoside triphosphate binding          | GO Molecular Function | 0.020 | GO:003563  | 179       | 23  |
|                                                     |                       |       | 5          | 9         | 9   |
|                                                     | GO Molecular Function | 0.020 | GO:004237  |           |     |
| Chemokine receptor binding                          |                       |       | 5          | 9         | 70  |
|                                                     | GO Molecular Function | 0.023 | GO:009736  | 222       | 5   |
| Carbohydrate derivative binding                     |                       |       | 4          | 7         | 6   |
|                                                     | GO Molecular Function | 0.026 | GO:003255  | 186       | 26  |
| Purine ribonucleotide binding                       |                       |       | 4          | 5         | 4   |
|                                                     | GO Molecular Function | 0.026 | GO:004316  | 280       | 23  |
| Anion binding                                       |                       |       | 4          | 8         | 5   |
|                                                     | GO Molecular Function | 0.026 | GO:199040  |           | 30  |
| Protein adp-ribosylase activity                     |                       |       | 4          | 4         | 15  |
|                                                     | InterPro Domains      | 0.027 |            |           | 3   |
| CXC chemokine                                       |                       |       | 3          | IPR001089 | 13  |
|                                                     | InterPro Domains      | 0.027 |            |           | 3   |
| CXC chemokine, conserved site                       |                       |       | 3          | IPR018048 | 13  |
|                                                     | InterPro Domains      | 0.029 |            |           | 3   |
| CXC Chemokine domain                                |                       |       | 8          | IPR033899 | 14  |
|                                                     | GO Molecular Function |       |            | GO:000800 | 3   |
| Chemokine activity                                  |                       |       | 0.031      | 9         | 48  |
|                                                     | GO Biological Process | 0.031 | GO:007136  |           | 4   |
| Cellular response to exogenous dsrna                |                       |       | 3          | 0         | 17  |
|                                                     | GO Biological Process | 0.033 | GO:003626  |           | 3   |
| Swimming behavior                                   |                       |       | 1          | 9         | 2   |
|                                                     | InterPro Domains      |       |            |           | 2   |
| Chemokine interleukin-8-like domain                 |                       |       | 0.034      | IPR001811 | 43  |
| Chemokine interleukin-8-like superfamily            |                       |       | 0.034      | IPR036048 | 43  |
|                                                     | KEGG Pathways         | 0.034 |            |           | 4   |
| Herpes simplex virus 1 infection                    |                       |       | 5          | hsa05168  | 479 |
| DEAD/DEAH box helicase                              |                       |       | 0.035      | PF00270   | 76  |
|                                                     | Pfam                  |       |            |           | 5   |

|                                                              |                       |       |           |     |    |
|--------------------------------------------------------------|-----------------------|-------|-----------|-----|----|
| Interferon regulatory factor transcription factor            | Pfam                  | 0.035 | PF00605   | 9   | 3  |
| Nucleotidyltransferase domain                                | Pfam                  | 0.035 | PF01909   | 11  | 3  |
| Guanylate-binding protein, N-terminal domain                 | Pfam                  | 0.035 | PF02263   | 11  | 3  |
| Guanylate-binding protein, C-terminal domain                 | Pfam                  | 0.035 | PF02841   | 9   | 3  |
|                                                              | UniProt               | 0.035 |           | 176 |    |
| Nucleotide-binding                                           | Keywords              | 1     | KW-0547   | 0   | 21 |
|                                                              | GO Molecular          | 0.035 | GO:001711 |     |    |
| Nucleoside-triphosphatase activity                           | Function              | 3     | 1         | 760 | 13 |
| Regulation of pattern recognition receptor signaling pathway | GO Biological Process | 0.037 | GO:006220 |     |    |
|                                                              | Process               | 5     | 7         | 95  | 5  |
| Positive regulation of cytokine production                   | GO Biological Process | 0.038 | GO:000181 |     |    |
|                                                              | Process               | 4     | 9         | 461 | 10 |
| Poly(ADP-ribose) polymerase, catalytic domain                | InterPro Domains      | 0.043 |           |     |    |
|                                                              | Domains               | 2     | IPR012317 | 17  | 3  |
| Mitochondrial immune response to SARS-CoV-2                  |                       | 0.043 |           |     |    |
|                                                              | WikiPathways          | 3     | WP5038    | 32  | 3  |
|                                                              | InterPro              | 0.044 |           |     |    |
| Interferon-induced protein 44 family                         | Domains               | 7     | IPR024644 | 2   | 2  |
|                                                              | UniProt               | 0.046 |           |     |    |
| Cytokine                                                     | Keywords              | 4     | KW-0202   | 186 | 6  |
|                                                              | UniProt               | 0.046 |           |     |    |
| Nucleotidyltransferase                                       | Keywords              | 4     | KW-0548   | 69  | 4  |

**Table S3. Pathways enriched in primary human intestinal myofibroblasts from Crohn's disease stricture tissue exposed to MFGE8, compared to untreated control**

| Description                                                                   | Category                    | FDR.v<br>alue | Term.na<br>me       | Term_<br>Size | Itersectio<br>n_Size |
|-------------------------------------------------------------------------------|-----------------------------|---------------|---------------------|---------------|----------------------|
| TGF-beta signaling pathway                                                    | KEGG<br>Pathways            | 3.56E-<br>11  | hsa04350            | 91            | 7                    |
| BMP signaling pathway, and<br>activin receptor signaling<br>pathway           | STRING<br>Clusters          | 8.46E-<br>10  | CL:21290            | 99            | 7                    |
| Mixed, incl. chondrogenesis, and<br>dan domain                                | STRING<br>Clusters          | 1.44E-<br>08  | CL:21347            | 24            | 5                    |
| TGF-beta propeptide                                                           | Pfam<br>InterPro            | 1.80E-<br>08  | PF00688<br>IPR00111 | 23            | 5                    |
| TGF-beta, propeptide                                                          | Domains<br>InterPro         | 2.37E-<br>08  | 1<br>IPR02903       | 21            | 5                    |
| Cystine-knot cytokine                                                         | Domains                     | 2.37E-<br>08  | 4                   | 75            | 6                    |
| Transforming growth factor-beta-<br>related                                   | InterPro<br>Domains         | 5.23E-<br>08  | IPR01561<br>5       | 32            | 5                    |
| Transforming growth factor beta,<br>conserved site                            | InterPro<br>Domains         | 5.23E-<br>08  | IPR01794<br>8       | 32            | 5                    |
| Transforming growth factor-beta,<br>C-terminal                                | InterPro<br>Domains         | 6.11E-<br>08  | IPR00183<br>9       | 37            | 5                    |
| Transforming growth factor beta<br>like domain                                | Pfam<br>UniProt             | 8.79E-<br>08  | PF00019             | 38            | 5                    |
| Chondrogenesis                                                                | Keywords                    | 3.80E-<br>07  | KW-0891             | 16            | 4                    |
| Chondrogenesis, and Repulsive<br>guidance molecule                            | STRING<br>Clusters          | 6.39E-<br>07  | CL:21350            | 16            | 4                    |
| Positive regulation of pathway-<br>restricted smad protein<br>phosphorylation | GO<br>Biological<br>Process | 2.15E-<br>06  | GO:00108<br>62      | 49            | 5                    |
| SMAD protein signal<br>transduction                                           | GO<br>Biological<br>Process | 2.58E-<br>06  | GO:00603<br>95      | 59            | 5                    |
| Transforming growth factor-beta<br>(TGF-beta) family                          | SMART<br>Domains<br>UniProt | 3.43E-<br>06  | SM00204             | 29            | 4                    |
| Growth factor                                                                 | Keywords                    | 6.02E-<br>06  | KW-0339             | 130           | 5                    |
| Hippo signaling pathway                                                       | KEGG<br>Pathways<br>GO      | 6.59E-<br>06  | hsa04390            | 153           | 5                    |
| BMP signaling pathway                                                         | Biological<br>Process       | 9.69E-<br>06  | GO:00305<br>09      | 90            | 5                    |

|                                                                                                    |                          |          |              |     |   |
|----------------------------------------------------------------------------------------------------|--------------------------|----------|--------------|-----|---|
| Positive regulation of cartilage development                                                       | GO<br>Biological Process | 1.63E-05 | GO:0061036   | 32  | 4 |
| Regulation of transmembrane receptor protein serine/threonine kinase signaling pathway             | GO<br>Biological Process | 1.63E-05 | GO:0090092   | 244 | 6 |
| BMP signaling pathway involved in heart development, and Spondylolisthesis                         | STRING<br>Clusters       | 2.07E-05 | CL:21354     | 7   | 3 |
| Cytokine                                                                                           | UniProt<br>Keywords      | 2.28E-05 | KW-0202      | 186 | 5 |
| Molecules associated with elastic fibres                                                           | Reactome<br>Pathways     | 2.80E-05 | HSA-2129379  | 38  | 4 |
| Cell proliferation involved in kidney development                                                  | GO<br>Biological Process | 8.37E-05 | GO:0072111   | 10  | 3 |
| Cytokine-cytokine receptor interaction                                                             | KEGG<br>Pathways         | 8.56E-05 | hsa04060     | 282 | 5 |
| Positive regulation of neuron differentiation                                                      | GO<br>Biological Process | 9.62E-05 | GO:0045666   | 377 | 6 |
| BMP receptor complex                                                                               | COMPARTMENTS             | 0.0001   | GOCC:0070724 | 9   | 3 |
| Mostly uncharacterized, incl. protein of unknown function (duf2781), and transmembrane protein 182 | STRING<br>Clusters       | 0.0001   | CL:29129     | 16  | 3 |
| Growth factor activity                                                                             | GO<br>Molecular Function | 0.0001   | GO:0008083   | 161 | 5 |
| BMP receptor binding                                                                               | GO<br>Molecular Function | 0.0001   | GO:0070700   | 12  | 3 |
| Mesenchymal cell proliferation                                                                     | GO<br>Biological Process | 2.00E-04 | GO:0010463   | 16  | 3 |
| Osteogenesis                                                                                       | UniProt<br>Keywords      | 0.0003   | KW-0892      | 35  | 3 |
| Cytokine activity                                                                                  | GO<br>Molecular Function | 0.0003   | GO:0005125   | 233 | 5 |
| Receptor ligand activity                                                                           | GO<br>Molecular Function | 0.0003   | GO:0048018   | 490 | 6 |
| Differentiation of white and brown adipocyte                                                       | WikiPathways             | 5.00E-04 | WP2895       | 25  | 3 |

|                                                                                                    |                          |             |                |     |   |
|----------------------------------------------------------------------------------------------------|--------------------------|-------------|----------------|-----|---|
| Regulation of osteoblast differentiation                                                           | GO<br>Biological Process | 0.0006<br>8 | GO:00456<br>67 | 117 | 4 |
| Odontogenesis                                                                                      | GO<br>Biological Process | 0.0007<br>1 | GO:00424<br>76 | 120 | 4 |
| Regulation of animal organ formation                                                               | GO<br>Biological Process | 0.0015      | GO:00031<br>56 | 38  | 3 |
| Positive regulation of bone mineralization                                                         | GO<br>Biological Process | 0.0016      | GO:00305<br>01 | 40  | 3 |
| Regulation of heart morphogenesis                                                                  | GO<br>Biological Process | 0.0018      | GO:20008<br>26 | 42  | 3 |
| Endocardial cushion development                                                                    | GO<br>Biological Process | 0.002       | GO:00031<br>97 | 44  | 3 |
| BMP signaling pathway involved in heart induction                                                  | GO<br>Biological Process | 0.0021      | GO:00031<br>30 | 3   | 2 |
| Positive regulation of epithelial to mesenchymal transition                                        | GO<br>Biological Process | 0.0021      | GO:00107<br>18 | 47  | 3 |
| Regulation of chondrocyte differentiation                                                          | GO<br>Biological Process | 0.0021      | GO:00323<br>30 | 51  | 3 |
| Cartilage development                                                                              | GO<br>Biological Process | 0.0021      | GO:00512<br>16 | 171 | 4 |
| Negative regulation of prostatic bud formation                                                     | GO<br>Biological Process | 0.0021      | GO:00606<br>86 | 4   | 2 |
| Negative regulation of glomerular mesangial cell proliferation                                     | GO<br>Biological Process | 0.0021      | GO:00721<br>25 | 3   | 2 |
| Mesenchymal cell proliferation involved in ureteric bud development                                | GO<br>Biological Process | 0.0021      | GO:00721<br>38 | 3   | 2 |
| Regulation of cardiocyte differentiation                                                           | GO<br>Biological Process | 0.0021      | GO:19052<br>07 | 49  | 3 |
| Positive regulation of cardiac neural crest cell migration involved in outflow tract morphogenesis | GO<br>Biological Process | 0.0021      | GO:19053<br>12 | 3   | 2 |

|                                                                                            |                          |        |                |      |   |
|--------------------------------------------------------------------------------------------|--------------------------|--------|----------------|------|---|
| Positive regulation of osteoblast differentiation                                          | GO<br>Biological Process | 0.0024 | GO:00456<br>69 | 60   | 3 |
| Skeletal system development                                                                | GO<br>Biological Process | 0.003  | GO:00015<br>01 | 499  | 5 |
| Regulation of branching involved in prostate gland morphogenesis                           | GO<br>Biological Process | 0.003  | GO:00606<br>87 | 6    | 2 |
| Development of ureteric collection system                                                  | WikiPathways             | 0.003  | WP5053         | 60   | 3 |
| Cleavage on pair of basic residues                                                         | UniProt Keywords         | 0.0037 | KW-0165        | 278  | 4 |
| Protein of unknown function (DUF2781)                                                      | Pfam                     | 0.0047 | PF10914        | 3    | 2 |
| Odontogenesis of dentin-containing tooth                                                   | GO<br>Biological Process | 0.0048 | GO:00424<br>75 | 81   | 3 |
| Ossification                                                                               | GO<br>Biological Process | 0.0049 | GO:00015<br>03 | 265  | 4 |
| Metanephros development                                                                    | GO<br>Biological Process | 0.0049 | GO:00016<br>56 | 84   | 3 |
| Generation of neurons                                                                      | GO<br>Biological Process | 0.0049 | GO:00486<br>99 | 1551 | 7 |
| Ureteric bud development                                                                   | GO<br>Biological Process | 0.005  | GO:00016<br>57 | 86   | 3 |
| Kidney development                                                                         | GO<br>Biological Process | 0.005  | GO:00018<br>22 | 271  | 4 |
| Negative regulation of mesenchymal cell apoptotic process                                  | GO<br>Biological Process | 0.0051 | GO:20010<br>54 | 10   | 2 |
| Mixed, incl. domain of unknown function duf4592, and protein of unknown function (duf2781) | STRING Clusters          | 0.0051 | CL:29131       | 6    | 2 |
| Regulation of bmp signaling pathway                                                        | GO<br>Biological Process | 0.0052 | GO:00305<br>10 | 90   | 3 |
| Positive regulation of animal organ morphogenesis                                          | GO<br>Biological Process | 0.0052 | GO:01101<br>10 | 89   | 3 |

|                                                         |                          |        |                |      |   |
|---------------------------------------------------------|--------------------------|--------|----------------|------|---|
| Embryonic skeletal joint morphogenesis                  | GO<br>Biological Process | 0.0055 | GO:00602<br>72 | 11   | 2 |
| Nervous system development                              | GO<br>Biological Process | 0.0057 | GO:00073<br>99 | 2371 | 8 |
| Telencephalon regionalization                           | GO<br>Biological Process | 0.0068 | GO:00219<br>78 | 13   | 2 |
| Pathway-restricted smad protein phosphorylation         | GO<br>Biological Process | 0.0068 | GO:00603<br>89 | 13   | 2 |
| Secreted                                                | UniProt<br>Keywords      | 0.007  | KW-0964        | 1818 | 7 |
| Positive regulation of multicellular organismal process | GO<br>Biological Process | 0.008  | GO:00512<br>40 | 1770 | 7 |
| Regulation of odontogenesis of dentin-containing tooth  | GO<br>Biological Process | 0.0091 | GO:00424<br>87 | 16   | 2 |
| EXPERA domain                                           | InterPro<br>Domains      | 0.0096 | IPR03311<br>8  | 5    | 2 |
| Negative regulation of cell differentiation             | GO<br>Biological Process | 0.0102 | GO:00455<br>96 | 728  | 5 |
| Embryonic limb morphogenesis                            | GO<br>Biological Process | 0.0105 | GO:00303<br>26 | 127  | 3 |
| Regulation of cell differentiation                      | GO<br>Biological Process | 0.0105 | GO:00455<br>95 | 1874 | 7 |
| Nephron development                                     | GO<br>Biological Process | 0.0105 | GO:00720<br>06 | 126  | 3 |
| Kidney mesenchyme development                           | GO<br>Biological Process | 0.0105 | GO:00720<br>74 | 18   | 2 |
| Spondylolisthesis                                       | DOID:668<br>DISEASES     | 0.0107 | 2              | 2    | 2 |
| Branching morphogenesis of an epithelial tube           | GO<br>Biological Process | 0.0111 | GO:00487<br>54 | 131  | 3 |
| Positive regulation of chondrocyte differentiation      | GO<br>Biological Process | 0.012  | GO:00323<br>32 | 20   | 2 |

|                                                       |                             |        |                |     |   |
|-------------------------------------------------------|-----------------------------|--------|----------------|-----|---|
| Pericardium development                               | GO<br>Biological<br>Process | 0.012  | GO:00600<br>39 | 20  | 2 |
| BMP binding                                           | GO<br>Molecular<br>Function | 0.0133 | GO:00361<br>22 | 12  | 2 |
| Co-receptor binding                                   | GO<br>Molecular<br>Function | 0.0138 | GO:00397<br>06 | 13  | 2 |
| Negative regulation of<br>chondrocyte differentiation | GO<br>Biological<br>Process | 0.0151 | GO:00323<br>31 | 23  | 2 |
| Mesenchymal cell differentiation                      | GO<br>Biological<br>Process | 0.0159 | GO:00487<br>62 | 152 | 3 |
| Dwarfism                                              | UniProt<br>Keywords         | 0.0169 | KW-0242        | 170 | 3 |
| Microphthalmia                                        | UniProt<br>Keywords         | 0.0169 | KW-1013        | 28  | 2 |
| Pattern specification process                         | GO<br>Biological<br>Process | 0.0173 | GO:00073<br>89 | 432 | 4 |
| Cardiac muscle tissue<br>development                  | GO<br>Biological<br>Process | 0.0175 | GO:00487<br>38 | 160 | 3 |
| Pharyngeal system development                         | GO<br>Biological<br>Process | 0.0175 | GO:00600<br>37 | 26  | 2 |
| Positive regulation of p38mapk<br>cascade             | GO<br>Biological<br>Process | 0.0175 | GO:19007<br>45 | 26  | 2 |
| Negative regulation of myoblast<br>differentiation    | GO<br>Biological<br>Process | 0.0183 | GO:00456<br>62 | 27  | 2 |
| Regulation of smad protein<br>signal transduction     | GO<br>Biological<br>Process | 0.0183 | GO:00603<br>90 | 27  | 2 |
| Adipogenesis                                          | WikiPathwa<br>ys            | 0.0188 | WP236          | 130 | 3 |
| DAN domain                                            | Pfam                        | 0.0192 | PF03045        | 9   | 2 |
| Brachydactyly                                         | HPO                         | 0.0256 | HP:00011<br>56 | 313 | 4 |
| Short middle phalanx of finger                        | HPO                         | 0.0256 | HP:00058<br>19 | 39  | 3 |
| Medially deviated second toe                          | HPO                         | 0.0256 | HP:00080<br>96 | 3   | 2 |



|                                                                                         |                    |        |                      |     |   |
|-----------------------------------------------------------------------------------------|--------------------|--------|----------------------|-----|---|
| Triangular shaped middle phalanx of the 5th finger                                      | HPO                | 0.0256 | HP:00091<br>82       | 3   | 2 |
| Type A2 brachydactyly                                                                   | HPO                | 0.0256 | HP:00093<br>72       | 3   | 2 |
| Ulnar deviation of the 2nd finger                                                       | HPO                | 0.0256 | HP:00094<br>64       | 6   | 2 |
| Radial deviation of the 2nd finger                                                      | HPO                | 0.0256 | HP:00094<br>67       | 7   | 2 |
| Short 2nd finger                                                                        | HPO                | 0.0256 | HP:00095<br>36       | 11  | 2 |
| Aplasia/Hypoplasia of the middle phalanx of the 2nd finger                              | HPO                | 0.0256 | HP:00095<br>68       | 7   | 2 |
| Triangular shaped middle phalanx of the 2nd finger                                      | HPO                | 0.0256 | HP:00095<br>75       | 3   | 2 |
| Short 2nd metacarpal                                                                    | HPO                | 0.0256 | HP:00100<br>38       | 3   | 2 |
| Facial asymmetry                                                                        | HPO                | 0.0258 | HP:00003<br>24       | 116 | 3 |
| Short middle phalanx of the 5th finger                                                  | HPO                | 0.0258 | HP:00042<br>20       | 16  | 2 |
| Endocardial cushion morphogenesis                                                       | Biological Process | 0.0262 | GO<br>GO:00032<br>03 | 34  | 2 |
| Positive regulation of bmp signaling pathway                                            | Biological Process | 0.0262 | GO:00305<br>13       | 34  | 2 |
| Oligodendrocyte specification and differentiation, leading to myelin components for CNS | WikiPathways       | 0.0277 | WP4304               | 30  | 2 |
| FGFR3 signaling in chondrocyte proliferation and terminal differentiation               | WikiPathways       | 0.0277 | WP4767               | 27  | 2 |
| Animal organ morphogenesis                                                              | Biological Process | 0.0278 | GO<br>GO:00098<br>87 | 967 | 5 |
| Regulation of cardiac muscle cell differentiation                                       | Biological Process | 0.0283 | GO:20007<br>25       | 36  | 2 |
| Hindlimb morphogenesis                                                                  | Biological Process | 0.0296 | GO:00351<br>37       | 37  | 2 |
| Central nervous system development                                                      | Biological Process | 0.0298 | GO:00074<br>17       | 988 | 5 |

|                                                               |                             |        |                |      |   |
|---------------------------------------------------------------|-----------------------------|--------|----------------|------|---|
| Heart development                                             | GO<br>Biological<br>Process | 0.0298 | GO:00075<br>07 | 522  | 4 |
| Embryo development                                            | GO<br>Biological<br>Process | 0.0309 | GO:00097<br>90 | 1002 | 5 |
| Regulation of multicellular<br>organismal process             | GO<br>Biological<br>Process | 0.0309 | GO:00512<br>39 | 3227 | 8 |
| Cellular response to organic<br>cyclic compound               | GO<br>Biological<br>Process | 0.0319 | GO:00714<br>07 | 537  | 4 |
| Glandular epithelial cell<br>differentiation                  | GO<br>Biological<br>Process | 0.0323 | GO:00020<br>67 | 40   | 2 |
| Negative regulation of mitotic<br>nuclear division            | GO<br>Biological<br>Process | 0.0323 | GO:00458<br>39 | 40   | 2 |
| Pituitary gland development                                   | GO<br>Biological<br>Process | 0.0345 | GO:00219<br>83 | 42   | 2 |
| Branching involved in ureteric<br>bud morphogenesis           | GO<br>Biological<br>Process | 0.0375 | GO:00016<br>58 | 44   | 2 |
| Tarsal synostosis                                             | HPO<br>GO                   | 0.0425 | HP:00083<br>68 | 25   | 2 |
| Negative regulation of striated<br>muscle tissue development  | GO<br>Biological<br>Process | 0.0466 | GO:00458<br>43 | 50   | 2 |
| Heart development                                             | WikiPathwa<br>ys            | 0.0468 | WP1591         | 44   | 2 |
| Pluripotent stem cell<br>differentiation pathway              | WikiPathwa<br>ys            | 0.0474 | WP2848         | 48   | 2 |
| Heart morphogenesis                                           | GO<br>Biological<br>Process | 0.0487 | GO:00030<br>07 | 251  | 3 |
| Heart valve morphogenesis                                     | GO<br>Biological<br>Process | 0.0493 | GO:00031<br>79 | 52   | 2 |
| Regulation of pri-mirna<br>transcription by rna polymerase ii | GO<br>Biological<br>Process | 0.0493 | GO:19028<br>93 | 52   | 2 |

**Table S4. Pathways enriched in primary human intestinal myofibroblasts exposed to MFGES8 from normal tissue compared to Crohn's disease stricture tissue**

Differentially regulated genes from normal compared to Crohn's disease stricture fibroblasts form the basis for this analysis.

| Description                                  | Category              | FDR.value | Term.name  | Term_Size | Intersection_Size |
|----------------------------------------------|-----------------------|-----------|------------|-----------|-------------------|
| Glycoprotein                                 | UniProt Keywords      | 1.76E-11  | KW-0325    | 4349      | 87                |
| Signal                                       | UniProt Keywords      | 1.30E-09  | KW-0732    | 3233      | 69                |
| Cell junction                                | GO Cellular Component | 1.08E-07  | GO:0030054 | 2075      | 51                |
| Synapse                                      | GO Cellular Component | 1.08E-07  | GO:0045202 | 1351      | 40                |
| Biological adhesion                          | GO Biological Process | 1.40E-07  | GO:0022610 | 931       | 34                |
| Cell adhesion                                | UniProt Keywords      | 2.44E-07  | KW-0130    | 474       | 22                |
| Cell adhesion                                | GO Biological Process | 2.69E-07  | GO:0007155 | 925       | 33                |
| Regulation of biological quality             | GO Biological Process | 3.70E-07  | GO:0065008 | 4042      | 76                |
| Focal adhesion                               | KEGG Pathways         | 4.08E-07  | hsa04510   | 198       | 15                |
| Neuron differentiation                       | GO Biological Process | 1.51E-06  | GO:0030182 | 1019      | 33                |
| Secreted                                     | UniProt Keywords      | 4.89E-06  | KW-0964    | 1818      | 42                |
| Focal adhesion                               | WikiPathways          | 6.06E-06  | WP306      | 196       | 14                |
| System development                           | GO Biological Process | 1.48E-05  | GO:0048731 | 4426      | 76                |
| Regulation of cellular component movement    | GO Biological Process | 1.48E-05  | GO:0051270 | 1009      | 31                |
| Regulation of cell migration                 | GO Biological Process | 2.03E-05  | GO:0030334 | 865       | 28                |
| Generation of neurons                        | GO Biological Process | 2.03E-05  | GO:0048699 | 1551      | 39                |
| Cell junction                                | UniProt Keywords      | 2.08E-05  | KW-0965    | 801       | 25                |
| Cell junction assembly                       | GO Biological Process | 2.15E-05  | GO:0034329 | 280       | 16                |
| Synapse organization                         | GO Biological Process | 2.23E-05  | GO:0050808 | 283       | 16                |
| Intrinsic component of plasma membrane       | GO Cellular Component | 2.46E-05  | GO:0031226 | 1703      | 40                |
| Positive regulation of developmental process | GO Biological Process | 2.54E-05  | GO:0051094 | 1389      | 36                |
| Regulation of locomotion                     | GO Biological Process | 3.41E-05  | GO:0040012 | 969       | 29                |
| Regulation of developmental process          | GO Biological Process | 3.41E-05  | GO:0050793 | 2648      | 53                |
| Regulation of localization                   | GO Biological Process | 3.44E-05  | GO:0032879 | 2740      | 54                |
| Synapse assembly                             | GO Biological Process | 4.16E-05  | GO:0007416 | 96        | 10                |
| Cell junction organization                   | GO Biological Process | 4.16E-05  | GO:0034330 | 493       | 20                |
| Regulation of synapse organization           | GO Biological Process | 4.16E-05  | GO:0050807 | 228       | 14                |

|                                                    |                       |          |              |      |    |
|----------------------------------------------------|-----------------------|----------|--------------|------|----|
| Anatomical structure morphogenesis                 | GO Biological Process | 4.29E-05 | GO:0009653   | 2165 | 46 |
| Neuron development                                 | GO Biological Process | 4.49E-05 | GO:0048666   | 827  | 26 |
| Nervous system development                         | GO Biological Process | 7.22E-05 | GO:0007399   | 2371 | 48 |
| Positive regulation of cell migration              | GO Biological Process | 7.26E-05 | GO:0030335   | 522  | 20 |
| Integral component of plasma membrane              | GO Cellular Component | 0.00014  | GO:0005887   | 1623 | 37 |
| Multicellular organism development                 | GO Biological Process | 0.00015  | GO:0007275   | 5023 | 78 |
| Extracellular region                               | GO Cellular Component | 0.00017  | GO:0005576   | 4166 | 68 |
| Cell-cell adhesion                                 | GO Biological Process | 0.00018  | GO:0098609   | 505  | 19 |
| Regulation of anatomical structure morphogenesis   | GO Biological Process | 0.00019  | GO:0022603   | 1095 | 29 |
| Extracellular matrix                               | GO Cellular Component | 2.00E-04 | GO:0031012   | 527  | 19 |
| Postsynapse                                        | GO Cellular Component | 2.00E-04 | GO:0098794   | 643  | 21 |
| Neuron projection development                      | GO Biological Process | 0.00021  | GO:0031175   | 680  | 22 |
| Cell junction                                      | COMPARTMENTS          | 0.00023  | GOCC:0030054 | 1045 | 29 |
| Intrinsic component of plasma membrane             | COMPARTMENTS          | 0.00023  | GOCC:0031226 | 841  | 26 |
| Regulation of multicellular organismal process     | GO Biological Process | 0.00023  | GO:0051239   | 3227 | 57 |
| Regulation of cell junction assembly               | GO Biological Process | 0.00023  | GO:1901888   | 199  | 12 |
| Integral component of plasma membrane              | COMPARTMENTS          | 0.00025  | GOCC:0005887 | 782  | 24 |
| Intrinsic component of membrane                    | COMPARTMENTS          | 0.00025  | GOCC:0031224 | 1552 | 36 |
| Integral component of membrane                     | COMPARTMENTS          | 0.00029  | GOCC:0016021 | 1456 | 34 |
| Mesenchyme                                         | TISSUES               | 0.00032  | BTO:0001393  | 10   | 5  |
| Regulation of cell adhesion                        | GO Biological Process | 0.00041  | GO:0030155   | 712  | 22 |
| System process                                     | GO Biological Process | 0.00047  | GO:0003008   | 1942 | 40 |
| Regulation of multicellular organismal development | GO Biological Process | 0.00047  | GO:2000026   | 2096 | 42 |
| Skeletal system development                        | GO Biological Process | 0.00048  | GO:0001501   | 499  | 18 |
| Anatomical structure development                   | GO Biological Process | 5.00E-04 | GO:0048856   | 5402 | 80 |
| Protein measurement                                | HPO                   | 0.00052  | EFO:0004747  | 5855 | 89 |
| Proteoglycans in cancer                            | KEGG Pathways         | 0.00057  | hsa05205     | 196  | 11 |
| Extracellular region                               | COMPARTMENTS          | 0.00061  | GOCC:0005576 | 2035 | 41 |

|                                                         |                       |          |              |      |    |
|---------------------------------------------------------|-----------------------|----------|--------------|------|----|
| Disulfide bond                                          | UniProt Keywords      | 0.00068  | KW-1015      | 3304 | 55 |
| Positive regulation of cell differentiation             | GO Biological Process | 0.00071  | GO:0045597   | 993  | 26 |
| Postsynaptic membrane                                   | GO Cellular Component | 0.00071  | GO:0045211   | 281  | 13 |
| Plasma membrane region                                  | GO Cellular Component | 0.00071  | GO:0098590   | 1219 | 29 |
| Multicellular organismal process                        | GO Biological Process | 0.00072  | GO:0032501   | 6933 | 95 |
| Signaling by Receptor Tyrosine Kinases                  | Reactome Pathways     | 0.00074  | HSA-9006934  | 502  | 19 |
| Circulatory system process                              | GO Biological Process | 0.00075  | GO:0003013   | 415  | 16 |
| Negative regulation of cell death                       | GO Biological Process | 0.00075  | GO:0060548   | 999  | 26 |
| Synaptic membrane                                       | GO Cellular Component | 8.00E-04 | GO:0097060   | 387  | 15 |
| Endocrine gland cancer                                  | DISEASES              | 0.00081  | DOID:170     | 84   | 9  |
| Collagen-containing extracellular matrix                | GO Cellular Component | 0.00095  | GO:0062023   | 396  | 15 |
| Asymmetric synapse                                      | GO Cellular Component | 0.00099  | GO:0032279   | 350  | 14 |
| Negative regulation of apoptotic process                | GO Biological Process | 0.0011   | GO:0043066   | 893  | 24 |
| Animal organ morphogenesis                              | GO Biological Process | 0.0013   | GO:0009887   | 967  | 25 |
| Cell morphogenesis                                      | GO Biological Process | 0.0014   | GO:0000902   | 726  | 21 |
| Regulation of protein phosphorylation                   | GO Biological Process | 0.0014   | GO:0001932   | 1459 | 32 |
| Neuron projection morphogenesis                         | GO Biological Process | 0.0014   | GO:0048812   | 495  | 17 |
| Regulation of cell morphogenesis                        | GO Biological Process | 0.0015   | GO:0022604   | 498  | 17 |
| EGFR tyrosine kinase inhibitor resistance               | KEGG Pathways         | 0.0015   | hsa01521     | 78   | 7  |
| PI3K-Akt signaling pathway                              | WikiPathways          | 0.0015   | WP4172       | 336  | 14 |
| Regulation of nitric oxide mediated signal transduction | GO Biological Process | 0.0016   | GO:0010749   | 10   | 4  |
| Positive regulation of multicellular organismal process | GO Biological Process | 0.0016   | GO:0051240   | 1770 | 36 |
| Postsynaptic specialization                             | GO Cellular Component | 0.0016   | GO:0099572   | 369  | 14 |
| Cell membrane                                           | UniProt Keywords      | 0.0016   | KW-1003      | 3246 | 53 |
| Focal adhesion: PI3K-Akt-mTOR-signaling pathway         | WikiPathways          | 0.0016   | WP3932       | 302  | 13 |
| Synapse                                                 | COMPARTMENTS          | 0.0019   | GOCC:0045202 | 499  | 17 |
| Liver carcinoma                                         | DISEASES              | 0.0019   | DOID:686     | 15   | 5  |

|                                                                |                       |        |            |      |    |
|----------------------------------------------------------------|-----------------------|--------|------------|------|----|
| Regulation of cell differentiation                             | GO Biological Process | 0.0021 | GO:0045595 | 1874 | 37 |
| Regulation of nervous system development                       | GO Biological Process | 0.0021 | GO:0051960 | 942  | 24 |
| Rap1 signaling pathway                                         | KEGG Pathways         | 0.0023 | hsa04015   | 202  | 10 |
| PI3K-Akt signaling pathway                                     | KEGG Pathways         | 0.0023 | hsa04151   | 350  | 13 |
| Regulation of synapse assembly                                 | GO Biological Process | 0.0024 | GO:0051963 | 106  | 8  |
| Chemical synaptic transmission                                 | GO Biological Process | 0.0025 | GO:0007268 | 418  | 15 |
| Positive regulation of protein autophosphorylation             | GO Biological Process | 0.0025 | GO:0031954 | 28   | 5  |
| Integral component of postsynaptic membrane                    | GO Cellular Component | 0.0026 | GO:0099055 | 119  | 8  |
| Synapse                                                        | UniProt Keywords      | 0.0026 | KW-0770    | 456  | 15 |
| Postsynaptic density                                           | GO Cellular Component | 0.0028 | GO:0014069 | 344  | 13 |
| Carcinoma                                                      | DISEASES              | 0.0029 | DOID:305   | 275  | 13 |
| Tissue development                                             | GO Biological Process | 0.003  | GO:0009888 | 1760 | 35 |
| EGFR tyrosine kinase inhibitor resistance                      | WikiPathways          | 0.0032 | WP4806     | 83   | 7  |
| Regulation of cell death                                       | GO Biological Process | 0.0034 | GO:0010941 | 1696 | 34 |
| Regulation of mapk cascade                                     | GO Biological Process | 0.0035 | GO:0043408 | 725  | 20 |
| Positive regulation of nervous system development              | GO Biological Process | 0.0036 | GO:0051962 | 547  | 17 |
| Intrinsic component of synaptic membrane                       | GO Cellular Component | 0.0038 | GO:0099240 | 169  | 9  |
| Extracellular matrix                                           | UniProt Keywords      | 0.0038 | KW-0272    | 265  | 11 |
| Glutamatergic synapse                                          | GO Cellular Component | 0.0039 | GO:0098978 | 361  | 13 |
| Plasma membrane                                                | GO Cellular Component | 0.0042 | GO:0005886 | 5314 | 74 |
| Response to reactive oxygen species                            | GO Biological Process | 0.0045 | GO:0000302 | 198  | 10 |
| Animal organ development                                       | GO Biological Process | 0.0045 | GO:0048513 | 3197 | 52 |
| Cell periphery                                                 | GO Cellular Component | 0.0046 | GO:0071944 | 5432 | 75 |
| HIF-1 signaling pathway                                        | KEGG Pathways         | 0.0046 | hsa04066   | 106  | 7  |
| Blood circulation                                              | GO Biological Process | 0.0048 | GO:0008015 | 394  | 14 |
| Positive regulation of phosphatidylinositol 3-kinase signaling | GO Biological Process | 0.0048 | GO:0014068 | 87   | 7  |
| Regulation of phosphatidylinositol 3-kinase signaling          | GO Biological Process | 0.0052 | GO:0014066 | 123  | 8  |

|                                                                  |                       |        |              |      |    |
|------------------------------------------------------------------|-----------------------|--------|--------------|------|----|
| Postsynaptic cell membrane                                       | UniProt Keywords      | 0.0055 | KW-0628      | 144  | 8  |
| Regulation of cell development                                   | GO Biological Process | 0.0059 | GO:0060284   | 956  | 23 |
| Regulation of leukocyte migration                                | GO Biological Process | 0.0063 | GO:0002685   | 209  | 10 |
| Regulation of smooth muscle cell migration                       | GO Biological Process | 0.0064 | GO:0014910   | 62   | 6  |
| Adherens junction                                                | COMPARTMENTS          | 0.0068 | GOCC:0005912 | 86   | 7  |
| Positive regulation of nitric oxide mediated signal transduction | GO Biological Process | 0.0068 | GO:0010750   | 5    | 3  |
| Regulation of cell-substrate adhesion                            | GO Biological Process | 0.0068 | GO:0010810   | 212  | 10 |
| Locomotion                                                       | GO Biological Process | 0.0068 | GO:0040011   | 1251 | 27 |
| Embryonic skeletal system development                            | GO Biological Process | 0.0068 | GO:0048706   | 130  | 8  |
| Positive regulation of intracellular signal transduction         | GO Biological Process | 0.0068 | GO:1902533   | 1041 | 24 |
| Positive regulation of glucose metabolic process                 | GO Biological Process | 0.0069 | GO:0010907   | 38   | 5  |
| Regulation of apoptotic process                                  | GO Biological Process | 0.0069 | GO:0042981   | 1550 | 31 |
| Cell development                                                 | GO Biological Process | 0.0069 | GO:0048468   | 1629 | 32 |
| Positive regulation of response to stimulus                      | GO Biological Process | 0.0069 | GO:0048584   | 2257 | 40 |
| Cell type cancer                                                 | DISEASES              | 0.0072 | DOID:0050687 | 406  | 15 |
| Disease of cellular proliferation                                | DISEASES              | 0.0072 | DOID:14566   | 1012 | 25 |
| Positive regulation of smooth muscle cell migration              | GO Biological Process | 0.0074 | GO:0014911   | 39   | 5  |
| Cancer                                                           | DISEASES              | 0.0074 | DOID:162     | 895  | 23 |
| Regulation of cell growth                                        | GO Biological Process | 0.0078 | GO:0001558   | 423  | 14 |
| Regulation of smooth muscle cell proliferation                   | GO Biological Process | 0.008  | GO:0048660   | 136  | 8  |
| Vital signs                                                      | HPO                   | 0.0081 | EFO:0004303  | 1265 | 30 |
| Self reported educational attainment                             | HPO                   | 0.0081 | EFO:0004784  | 1006 | 26 |
| Mathematical ability                                             | HPO                   | 0.0081 | EFO:0004875  | 731  | 22 |
| Systolic blood pressure                                          | HPO                   | 0.0081 | EFO:0006335  | 873  | 24 |
| Blood protein measurement                                        | HPO                   | 0.0081 | EFO:0007937  | 1815 | 38 |
| Phenotypic abnormality                                           | HPO                   | 0.0081 | HP:0000118   | 5134 | 77 |

|                                                       |                       |        |              |      |    |
|-------------------------------------------------------|-----------------------|--------|--------------|------|----|
| Robo4 and VEGF signaling pathways crosstalk           | WikiPathways          | 0.0083 | WP3943       | 6    | 3  |
| Positive regulation of mapk cascade                   | GO Biological Process | 0.0085 | GO:0043410   | 543  | 16 |
| Extracellular matrix                                  | COMPARTMENTS          | 0.0086 | GOCC:0031012 | 253  | 11 |
| Positive regulation of cell junction assembly         | GO Biological Process | 0.0093 | GO:1901890   | 102  | 7  |
| Regulation of immune system process                   | GO Biological Process | 0.0097 | GO:0002682   | 1514 | 30 |
| Regulation of postsynaptic membrane potential         | GO Biological Process | 0.0101 | GO:0060078   | 104  | 7  |
| Regulation of protein localization to plasma membrane | GO Biological Process | 0.0101 | GO:1903076   | 104  | 7  |
| Colon cancer                                          | DISEASES              | 0.0103 | DOID:219     | 14   | 4  |
| Hepatocellular carcinoma                              | DISEASES              | 0.0103 | DOID:684     | 14   | 4  |
| Vascular process in circulatory system                | GO Biological Process | 0.0104 | GO:0003018   | 185  | 9  |
| Cell differentiation                                  | GO Biological Process | 0.0104 | GO:0030154   | 3702 | 56 |
| Regulation of membrane potential                      | GO Biological Process | 0.0104 | GO:0042391   | 440  | 14 |
| Regulation of cellular component organization         | GO Biological Process | 0.0104 | GO:0051128   | 2402 | 41 |
| Positive regulation of protein phosphorylation        | GO Biological Process | 0.0107 | GO:0001934   | 1019 | 23 |
| Cell motility                                         | GO Biological Process | 0.0107 | GO:0048870   | 1018 | 23 |
| Regulation of axonogenesis                            | GO Biological Process | 0.0107 | GO:0050770   | 187  | 9  |
| Receptor complex                                      | COMPARTMENTS          | 0.0114 | GOCC:0043235 | 420  | 14 |
| Angiogenesis                                          | WikiPathways          | 0.0115 | WP1539       | 24   | 4  |
| Aryl hydrocarbon receptor Netpath                     | WikiPathways          | 0.0115 | WP2586       | 46   | 5  |
| Caloric restriction and aging                         | WikiPathways          | 0.0115 | WP4191       | 8    | 3  |
| Cell projection organization                          | GO Biological Process | 0.0117 | GO:0030030   | 1170 | 25 |
| Embryonic organ development                           | GO Biological Process | 0.0117 | GO:0048568   | 448  | 14 |
| Regulation of transport                               | GO Biological Process | 0.0117 | GO:0051049   | 1776 | 33 |
| Regulation of cellular localization                   | GO Biological Process | 0.0117 | GO:0060341   | 1027 | 23 |
| Chemical synaptic transmission, postsynaptic          | GO Biological Process | 0.0117 | GO:0099565   | 109  | 7  |
| Eye photoreceptor cell differentiation                | GO Biological Process | 0.012  | GO:0001754   | 46   | 5  |



|                                                        |                       |        |              |      |    |
|--------------------------------------------------------|-----------------------|--------|--------------|------|----|
| Negative regulation of leukocyte migration             | GO Biological Process | 0.012  | GO:0002686   | 46   | 5  |
| Cell migration                                         | GO Biological Process | 0.012  | GO:0016477   | 896  | 21 |
| Bone resorption                                        | GO Biological Process | 0.012  | GO:0045453   | 23   | 4  |
| Positive regulation of epithelial cell proliferation   | GO Biological Process | 0.012  | GO:0050679   | 192  | 9  |
| Eye morphogenesis                                      | GO Biological Process | 0.0126 | GO:0048592   | 151  | 8  |
| Regulation of protein modification process             | GO Biological Process | 0.0127 | GO:0031399   | 1870 | 34 |
| Regulation of erk1 and erk2 cascade                    | GO Biological Process | 0.0128 | GO:0070372   | 292  | 11 |
| Fluid shear stress and atherosclerosis                 | KEGG Pathways         | 0.0131 | hsa05418     | 130  | 7  |
| Cellular response to oxidative stress                  | GO Biological Process | 0.0133 | GO:0034599   | 244  | 10 |
| Synaptic membrane                                      | COMPARTMENTS          | 0.0135 | GOCC:0097060 | 139  | 8  |
| Regulation of protein localization to membrane         | GO Biological Process | 0.0138 | GO:1905475   | 198  | 9  |
| Developmental protein                                  | UniProt Keywords      | 0.014  | KW-0217      | 953  | 21 |
| Heparin-binding                                        | UniProt Keywords      | 0.014  | KW-0358      | 88   | 6  |
| Plasma membrane bounded cell projection organization   | GO Biological Process | 0.0141 | GO:0120036   | 1122 | 24 |
| Clear cell renal cell carcinoma pathways               | WikiPathways          | 0.0144 | WP4018       | 85   | 6  |
| Cardiovascular measurement                             | HPO                   | 0.0146 | EFO:0004298  | 2382 | 43 |
| Lipid or lipoprotein measurement                       | HPO                   | 0.0146 | EFO:0005105  | 2150 | 40 |
| Cardiovascular disease biomarker measurement           | HPO                   | 0.0146 | EFO:0005278  | 2232 | 41 |
| Prostate cancer                                        | KEGG Pathways         | 0.0149 | hsa05215     | 96   | 6  |
| Blood vessel morphogenesis                             | GO Biological Process | 0.0157 | GO:0048514   | 410  | 13 |
| Cellular response to organonitrogen compound           | GO Biological Process | 0.0158 | GO:0071417   | 590  | 16 |
| Plasma membrane                                        | COMPARTMENTS          | 0.0161 | GOCC:0005886 | 3531 | 54 |
| Tube morphogenesis                                     | GO Biological Process | 0.0162 | GO:0035239   | 656  | 17 |
| Regulation of system process                           | GO Biological Process | 0.0162 | GO:0044057   | 592  | 16 |
| Homeostasis of number of cells                         | GO Biological Process | 0.0162 | GO:0048872   | 204  | 9  |
| Positive regulation of cellular component organization | GO Biological Process | 0.0162 | GO:0051130   | 1209 | 25 |

|                                                                                                       |                       |        |              |      |    |
|-------------------------------------------------------------------------------------------------------|-----------------------|--------|--------------|------|----|
| Positive regulation of blood vessel endothelial cell proliferation involved in sprouting angiogenesis | GO Biological Process | 0.0162 | GO:1903589   | 9    | 3  |
| Needle                                                                                                | TISSUES               | 0.0164 | BTO:0000917  | 4    | 3  |
| Oxidation                                                                                             | UniProt Keywords      | 0.0166 | KW-0558      | 32   | 4  |
| Postsynaptic specialization membrane                                                                  | GO Cellular Component | 0.0168 | GO:0099634   | 126  | 7  |
| Cadherin cytoplasmic C-terminal                                                                       | Pfam                  | 0.0168 | PF16492      | 42   | 6  |
| Regulation of cell-matrix adhesion                                                                    | GO Biological Process | 0.0171 | GO:0001952   | 120  | 7  |
| Hepatobiliary system cancer                                                                           | DISEASES              | 0.0177 | DOID:0080355 | 63   | 6  |
| Camera-type eye morphogenesis                                                                         | GO Biological Process | 0.0178 | GO:0048593   | 121  | 7  |
| Regulation of cell morphogenesis involved in differentiation                                          | GO Biological Process | 0.018  | GO:0010769   | 309  | 11 |
| Regulation of protein localization                                                                    | GO Biological Process | 0.018  | GO:0032880   | 934  | 21 |
| Regulation of neuron differentiation                                                                  | GO Biological Process | 0.018  | GO:0045664   | 665  | 17 |
| Positive regulation of erk1 and erk2 cascade                                                          | GO Biological Process | 0.018  | GO:0070374   | 209  | 9  |
| Cell-cell adhesion via plasma-membrane adhesion molecules                                             | GO Biological Process | 0.018  | GO:0098742   | 257  | 10 |
| Eye development                                                                                       | GO Biological Process | 0.0181 | GO:0001654   | 365  | 12 |
| Homophilic cell adhesion via plasma membrane adhesion molecules                                       | GO Biological Process | 0.0181 | GO:0007156   | 164  | 8  |
| Axon development                                                                                      | GO Biological Process | 0.0181 | GO:0061564   | 421  | 13 |
| Positive regulation of cell adhesion                                                                  | GO Biological Process | 0.0184 | GO:0045785   | 423  | 13 |
| Homeobox protein, antennapedia type, conserved site                                                   | InterPro Domains      | 0.019  | IPR001827    | 20   | 5  |
| Cadherin, cytoplasmic C-terminal domain                                                               | InterPro Domains      | 0.019  | IPR032455    | 40   | 6  |
| Platelet alpha granule                                                                                | GO Cellular Component | 0.0191 | GO:0031091   | 91   | 6  |
| Membrane raft                                                                                         | GO Cellular Component | 0.0191 | GO:0045121   | 324  | 11 |
| Blood pressure                                                                                        | HPO                   | 0.0192 | EFO:0004325  | 1139 | 26 |
| Lipid measurement                                                                                     | HPO                   | 0.0192 | EFO:0004529  | 1959 | 37 |
| Positive regulation of phosphate metabolic process                                                    | GO Biological Process | 0.0203 | GO:0045937   | 1164 | 24 |

|                                                                                  |                       |        |              |      |    |
|----------------------------------------------------------------------------------|-----------------------|--------|--------------|------|----|
| Positive regulation of smooth muscle cell proliferation                          | GO Biological Process | 0.0203 | GO:0048661   | 88   | 6  |
| Sensory organ morphogenesis                                                      | GO Biological Process | 0.0203 | GO:0090596   | 264  | 10 |
| Postsynapse organization                                                         | GO Biological Process | 0.0203 | GO:0099173   | 88   | 6  |
| Phospholipase D signaling pathway                                                | KEGG Pathways         | 0.0207 | hsa04072     | 147  | 7  |
| Negative regulation of protein metabolic process                                 | GO Biological Process | 0.0208 | GO:0051248   | 1096 | 23 |
| Positive regulation of cell growth                                               | GO Biological Process | 0.0215 | GO:0030307   | 171  | 8  |
| Positive regulation of cyclin-dependent protein serine/threonine kinase activity | GO Biological Process | 0.0217 | GO:0045737   | 30   | 4  |
| Positive regulation of cell development                                          | GO Biological Process | 0.0218 | GO:0010720   | 556  | 15 |
| Positive regulation of oxidoreductase activity                                   | GO Biological Process | 0.0218 | GO:0051353   | 57   | 5  |
| Response to fatty acid                                                           | GO Biological Process | 0.0226 | GO:0070542   | 91   | 6  |
| Integrin binding                                                                 | GO Molecular Function | 0.0232 | GO:0005178   | 147  | 9  |
| Glycosaminoglycan binding                                                        | GO Molecular Function | 0.0232 | GO:0005539   | 240  | 11 |
| Heparin binding                                                                  | GO Molecular Function | 0.0232 | GO:0008201   | 172  | 10 |
| Blood vessel development                                                         | GO Biological Process | 0.0238 | GO:0001568   | 500  | 14 |
| Vascular disease                                                                 | DISEASES              | 0.0238 | DOID:178     | 223  | 10 |
| Cell periphery                                                                   | COMPARTMENTS          | 0.0244 | GOCC:0071944 | 3688 | 55 |
| Axonogenesis                                                                     | GO Biological Process | 0.0247 | GO:0007409   | 384  | 12 |
| Cell morphogenesis involved in differentiation                                   | GO Biological Process | 0.0251 | GO:0000904   | 566  | 15 |
| Bladder cancer                                                                   | KEGG Pathways         | 0.0255 | hsa05219     | 41   | 4  |
| Positive regulation of signal transduction                                       | GO Biological Process | 0.0256 | GO:0009967   | 1654 | 30 |
| Activation of protein kinase b activity                                          | GO Biological Process | 0.0256 | GO:0032148   | 32   | 4  |
| Peptidyl-tyrosine autophosphorylation                                            | GO Biological Process | 0.0256 | GO:0038083   | 32   | 4  |
| Regulation of cellular protein localization                                      | GO Biological Process | 0.0256 | GO:1903827   | 568  | 15 |
| Insulin receptor complex                                                         | COMPARTMENTS          | 0.0259 | GOCC:0005899 | 9    | 3  |
| Tubulin complex                                                                  | COMPARTMENTS          | 0.0259 | GOCC:0045298 | 9    | 3  |
| Negative regulation of lipid metabolic process                                   | GO Biological Process | 0.0261 | GO:0045833   | 95   | 6  |

|                                                            |                       |        |             |      |    |
|------------------------------------------------------------|-----------------------|--------|-------------|------|----|
| Negative regulation of cell adhesion                       | GO Biological Process | 0.0274 | GO:0007162  | 280  | 10 |
| Regulation of actin cytoskeleton                           | KEGG Pathways         | 0.0275 | hsa04810    | 209  | 8  |
| Regulation of signaling                                    | GO Biological Process | 0.0276 | GO:0023051  | 3553 | 52 |
| Response to oxidative stress                               | GO Biological Process | 0.0283 | GO:0006979  | 393  | 12 |
| Negative regulation of cell-substrate adhesion             | GO Biological Process | 0.0283 | GO:0010812  | 62   | 5  |
| Brain measurement                                          | HPO                   | 0.0283 | EFO:0004464 | 1177 | 26 |
| Extracellular matrix organization                          | GO Biological Process | 0.0293 | GO:0030198  | 338  | 11 |
| Tissue regeneration                                        | GO Biological Process | 0.0293 | GO:0042246  | 63   | 5  |
| Regulation of kinase activity                              | GO Biological Process | 0.0293 | GO:0043549  | 918  | 20 |
| Negative regulation of cellular process                    | GO Biological Process | 0.0293 | GO:0048523  | 4874 | 66 |
| Regulation of epithelial cell proliferation                | GO Biological Process | 0.0293 | GO:0050678  | 339  | 11 |
| Regulation of presynapse assembly                          | GO Biological Process | 0.0293 | GO:1905606  | 34   | 4  |
| Tube development                                           | GO Biological Process | 0.0296 | GO:0035295  | 851  | 19 |
| Human papillomavirus infection                             | KEGG Pathways         | 0.0303 | hsa05165    | 325  | 10 |
| Regulation of protein serine/threonine kinase activity     | GO Biological Process | 0.0306 | GO:0071900  | 521  | 14 |
| RAC1/PAK1/p38/MMP2 pathway                                 | WikiPathways          | 0.0331 | WP3303      | 67   | 5  |
| Physico-chemical features and toxicity-associated pathways | WikiPathways          | 0.0331 | WP3680      | 66   | 5  |
| Disease of mental health                                   | DISEASES              | 0.0334 | DOID:150    | 689  | 18 |
| Positive regulation of synapse assembly                    | GO Biological Process | 0.0341 | GO:0051965  | 66   | 5  |
| Skeletal system morphogenesis                              | GO Biological Process | 0.0347 | GO:0048705  | 240  | 9  |
| Regulation of cell communication                           | GO Biological Process | 0.0353 | GO:0010646  | 3514 | 51 |
| Endothelial cell migration                                 | GO Biological Process | 0.0356 | GO:0043542  | 67   | 5  |
| Response to wounding                                       | GO Biological Process | 0.0358 | GO:0009611  | 532  | 14 |
| Negative regulation of small molecule metabolic process    | GO Biological Process | 0.0359 | GO:0062014  | 104  | 6  |
| Positive regulation of epithelial cell migration           | GO Biological Process | 0.0372 | GO:0010634  | 147  | 7  |
| Circulatory system development                             | GO Biological Process | 0.0372 | GO:0072359  | 872  | 19 |

|                                                                           |                       |        |              |      |    |
|---------------------------------------------------------------------------|-----------------------|--------|--------------|------|----|
| Hormone metabolic process                                                 | GO Biological Process | 0.0375 | GO:0042445   | 194  | 8  |
| Ras signaling pathway                                                     | KEGG Pathways         | 0.0377 | hsa04014     | 226  | 8  |
| Negative regulation of cell-matrix adhesion                               | GO Biological Process | 0.0386 | GO:0001953   | 38   | 4  |
| Protein kinase b signaling                                                | GO Biological Process | 0.0386 | GO:0043491   | 38   | 4  |
| Positive regulation of glucose import                                     | GO Biological Process | 0.0386 | GO:0046326   | 38   | 4  |
| Platelet alpha granule                                                    | COMPARTMENTS          | 0.039  | GOCC:0031091 | 91   | 6  |
| Bladder cancer                                                            | WikiPathways          | 0.0393 | WP2828       | 40   | 4  |
| ECM-receptor interaction                                                  | KEGG Pathways         | 0.0398 | hsa04512     | 88   | 5  |
| Regulation of postsynapse organization                                    | GO Biological Process | 0.04   | GO:0099175   | 107  | 6  |
| Amplification and expansion of oncogenic pathways as metastatic traits    | WikiPathways          | 0.0401 | WP3678       | 17   | 3  |
| Positive regulation of dna biosynthetic process                           | GO Biological Process | 0.0408 | GO:2000573   | 70   | 5  |
| Plasma membrane raft                                                      | GO Cellular Component | 0.0408 | GO:0044853   | 109  | 6  |
| Positive regulation of protein modification process                       | GO Biological Process | 0.041  | GO:0031401   | 1252 | 24 |
| Regulation of protein kinase activity                                     | GO Biological Process | 0.0411 | GO:0045859   | 812  | 18 |
| Cellular response to chemical stimulus                                    | GO Biological Process | 0.0415 | GO:0070887   | 2919 | 44 |
| Regulation of growth                                                      | GO Biological Process | 0.0416 | GO:0040008   | 676  | 16 |
| Cell-cell contact zone                                                    | GO Cellular Component | 0.0416 | GO:0044291   | 72   | 5  |
| Positive regulation of glycogen biosynthetic process                      | GO Biological Process | 0.0417 | GO:0045725   | 16   | 3  |
| Positive regulation of lipid metabolic process                            | GO Biological Process | 0.042  | GO:0045834   | 152  | 7  |
| Positive regulation of dna metabolic process                              | GO Biological Process | 0.0426 | GO:0051054   | 200  | 8  |
| Regulation of cell shape                                                  | GO Biological Process | 0.0432 | GO:0008360   | 153  | 7  |
| TGF-beta signaling in thyroid cells for epithelial-mesenchymal transition | WikiPathways          | 0.0432 | WP3859       | 18   | 3  |
| Extracellular vesicles in the crosstalk of cardiac cells                  | WikiPathways          | 0.0432 | WP4300       | 18   | 3  |
| Genes controlling nephrogenesis                                           | WikiPathways          | 0.0432 | WP4823       | 44   | 4  |

|                                                                                 |                       |        |            |      |    |
|---------------------------------------------------------------------------------|-----------------------|--------|------------|------|----|
| Regulation of transferase activity                                              | GO Biological Process | 0.0437 | GO:0051338 | 1036 | 21 |
| Cell-cell junction                                                              | GO Cellular Component | 0.0438 | GO:0005911 | 490  | 13 |
| GABA-ergic synapse                                                              | GO Cellular Component | 0.0438 | GO:0098982 | 74   | 5  |
| Integral component of postsynaptic specialization membrane                      | GO Cellular Component | 0.0448 | GO:0099060 | 75   | 5  |
| Mechanoregulation and pathology of YAP/TAZ via Hippo and non-Hippo mechanisms   | WikiPathways          | 0.0451 | WP4534     | 46   | 4  |
| Positive regulation of cell communication                                       | GO Biological Process | 0.0453 | GO:0010647 | 1823 | 31 |
| Regulation of oxidoreductase activity                                           | GO Biological Process | 0.0453 | GO:0051341 | 111  | 6  |
| Positive regulation of sprouting angiogenesis                                   | GO Biological Process | 0.0462 | GO:1903672 | 41   | 4  |
| Regulation of plasma membrane bounded cell projection organization              | GO Biological Process | 0.0467 | GO:0120035 | 687  | 16 |
| Regulation of cellular component biogenesis                                     | GO Biological Process | 0.0472 | GO:0044087 | 971  | 20 |
| Positive regulation of signaling                                                | GO Biological Process | 0.0474 | GO:0023056 | 1831 | 31 |
| Regulation of neurogenesis                                                      | GO Biological Process | 0.0474 | GO:0050767 | 828  | 18 |
| Myeloid leukocyte differentiation                                               | GO Biological Process | 0.0476 | GO:0002573 | 113  | 6  |
| Regeneration                                                                    | GO Biological Process | 0.0476 | GO:0031099 | 157  | 7  |
| Cell population proliferation                                                   | GO Biological Process | 0.0479 | GO:0008283 | 493  | 13 |
| Osteoclast differentiation                                                      | GO Biological Process | 0.0479 | GO:0030316 | 42   | 4  |
| Positive regulation of kinase activity                                          | GO Biological Process | 0.0479 | GO:0033674 | 624  | 15 |
| Regulation of transcription from rna polymerase ii promoter in response to iron | GO Biological Process | 0.0479 | GO:0034395 | 3    | 2  |
| Regulation of peptidyl-tyrosine phosphorylation                                 | GO Biological Process | 0.0479 | GO:0050730 | 258  | 9  |
| Diterpenoid metabolic process                                                   | GO Biological Process | 0.0482 | GO:0016101 | 114  | 6  |
| Regulation of plasma lipoprotein particle levels                                | GO Biological Process | 0.0482 | GO:0097006 | 75   | 5  |
| Regulation of molecular function                                                | GO Biological Process | 0.0485 | GO:0065009 | 4913 | 65 |
| Angiogenesis                                                                    | GO Biological Process | 0.0486 | GO:0001525 | 315  | 10 |

|                                                  |                       |        |            |      |    |
|--------------------------------------------------|-----------------------|--------|------------|------|----|
| Regulation of cellular protein metabolic process | GO Biological Process | 0.0486 | GO:0032268 | 2693 | 41 |
| Collagen binding                                 | GO Molecular Function | 0.0488 | GO:0005518 | 68   | 6  |
| Cellular response to oxygen-containing compound  | GO Biological Process | 0.0497 | GO:1901701 | 1055 | 21 |

**Table S5. Primers used for quantitative and qualitative polymerase chain reaction**

| Gene     | Forward primer            | Reverse primer           |
|----------|---------------------------|--------------------------|
| HSP90AB1 | CGAAGTTGGACAGTGGTAAAGAG   | TGCCCAATCATGGAGATGTCT    |
| UBC      | ATTTGGGTCGCGGTTCTTG       | TGCCTTGACATTCTCGATGGT    |
| B2M      | GAGGCTATCCAGCGTACTCCA     | CGGCAGGCATACTCATCTTTT    |
| GUSB     | GTCTGCGGCATTTTGTCTGG      | CACACGATGGCATAGGAATGG    |
| ACTB     | GTTGCTATCCAGGCTGTG        | TGATCTTGATCTTCATTGTG     |
| GAPDH    | AACTTTGGTATCGTGGAAGGAC    | CAGTAGAGGCAGGGATGATGTT   |
| HPRT1    | ACCAGTCAACAGGGGACATAA     | CTTCGTGGGGTCTTTTTCACC    |
| TFRC     | ACCATTGTCATATACCCGGTTCA   | CAATAGCCCAAGTAGCCAATCAT  |
| PPIA     | CCCACCGTGTTCTTCGACATT     | GGACCCGTATGCTTTAGGATGA   |
| RPLP0    | AGCCCAGAACACTGGTCTC;ACTCA | GGATTTCAATGGTGCC         |
| RPL13A   | GCCATCGTGGCTAAACAGGTA     | GTTGGTGTTCATCCGCTTGC     |
| MFGE8    | CCTGCCACAACGGTGGTTTAT     | GCGATCTGTGAGTTGGCAATGT   |
| ACTA2    | AAGAGGAATCCTGACCCTGAA     | TGGTGATGATGCCATGTTCT     |
| FN1      | TTCTAAGATTTGGTTTGGGATCAAT | TCTTGGTTGGCTGCATATGC     |
| COL1A1   | CACACGTCTCGGTCATGGTA      | AAGAGGAAGGCCAAGTCGAG     |
| COL3A1   | TCCCACTATTATTTGGCACAACA   | TCATCGCAGAGAACGACGGATCC  |
| ITGAV    | AATGTAATGATGAGCTTGGTGGAGA | AGGTGACATTGAGATGGGTAGTGG |
| ITGB3    | GAGGTCATCCCTGGCCTCAA      | CTGGCAGGCACAGTCACAATC    |
| ITGB5    | AGCGGCGACACACTAGGA        | ATCCGTCCCGCAGCACT        |



## REFERENCES

- 1 Chen HJ, Wei Z, Sun J, Bhattacharya A, Savage DJ, Serda R, *et al.* A recellularized human colon model identifies cancer driver genes. *Nat Biotechnol* 2016;**34**:845-51.
- 2 Giuffrida P, Curti M, Al-Akkad W, Biel C, Crowley C, Frenguelli L, *et al.* Decellularized Human Gut as a Natural 3D Platform for Research in Intestinal Fibrosis. *Inflamm Bowel Dis* 2019;**25**:1740-50.
- 3 Keane TJ, Londono R, Turner NJ, Badylak SF. Consequences of ineffective decellularization of biologic scaffolds on the host response. *Biomaterials* 2012;**33**:1771-81.
- 4 Mao R, Doyon G, Gordon IO, Li J, Lin S, Wang J, *et al.* Activated intestinal muscle cells promote preadipocyte migration: a novel mechanism for creeping fat formation in Crohn's disease. *Gut* 2021;**1**:55-67.
- 5 Zhao S, Dejanovic D, Yao P, Bhilocha S, Sadler T, Schirbel A, *et al.* Selective deletion of MyD88 signaling in alpha-SMA positive cells ameliorates experimental intestinal fibrosis via post-transcriptional regulation. *Mucosal Immunol* 2020;**13**:665-78.
- 6 McCarthy DJ, Chen Y, Smyth GK. Differential expression analysis of multifactor RNA-Seq experiments with respect to biological variation. *Nucleic Acids Res* 2012;**40**:4288-97.
- 7 Ritchie ME, Phipson B, Wu D, Hu Y, Law CW, Shi W, *et al.* limma powers differential expression analyses for RNA-sequencing and microarray studies. *Nucleic Acids Res* 2015;**43**:e47.
- 8 Flynn R, Paz K, Du J, Reichenbach DK, Taylor PA, Panoskaltis-Mortari A, *et al.* Targeted Rho-associated kinase 2 inhibition suppresses murine and human chronic GVHD through a Stat3-dependent mechanism. *Blood* 2016;**127**:2144-54.

- 9 Mao R, Doyon G, Gordon IO, Li J, Lin S, Wang J, *et al.* Activated intestinal muscle cells promote preadipocyte migration: a novel mechanism for creeping fat formation in Crohn's disease. *Gut* 2022;**71**:55-67.
- 10 Lawrance IC, Wu F, Leite AZ, Willis J, West GA, Fiocchi C, *et al.* A murine model of chronic inflammation-induced intestinal fibrosis down-regulated by antisense NF-kappa B. *Gastroenterology* 2003;**125**:1750-61.
- 11 Li J, Dejanovic D, Zangara MT, Chandra J, McDonald C, Rieder F. Mouse Models of Intestinal Fibrosis. *Methods Mol Biol* 2021;**2299**:385-403.
- 12 Rieder F, Siegmund B, Bundschuh DS, Lehr HA, Endres S, Eigler A. The selective phosphodiesterase 4 inhibitor roflumilast and phosphodiesterase 3/4 inhibitor pumafentrine reduce clinical score and TNF expression in experimental colitis in mice. *PLoS One* 2013;**8**:e56867.
- 13 Siegmund B, Rieder F, Albrich S, Wolf K, Bidlingmaier C, Firestein GS, *et al.* Adenosine kinase inhibitor GP515 improves experimental colitis in mice. *J Pharmacol Exp Ther* 2001;**296**:99-105.
- 14 Datta R, Lizama CO, Soltani AK, McKleroy W, Podolsky MJ, Yang CD, *et al.* Autoregulation of insulin receptor signaling through MFGE8 and the alphavbeta5 integrin. *Proc Natl Acad Sci U S A* 2021;**118**.
- 15 Kaiko GE, Stappenbeck TS. Host-microbe interactions shaping the gastrointestinal environment. *Trends Immunol* 2014;**35**:538-48.
- 16 Rieder F, Kessler SP, West GA, Bhilocha S, de la Motte C, Sadler TM, *et al.* Inflammation-induced endothelial-to-mesenchymal transition: a novel mechanism of intestinal fibrosis. *Am J Pathol* 2012;**179**:2660-73.

- 17 Rieder F, Georgieva M, Schirbel A, Artinger M, Zugner A, Blank M, *et al.* Prostaglandin E2 inhibits migration of colonic lamina propria fibroblasts. *Inflamm Bowel Dis* 2010;**16**:1505-13.
- 18 Khandia R, Munjal A. Interplay between inflammation and cancer. *Adv Protein Chem Struct Biol* 2020;**119**:199-245.
- 19 Rieder F, Kessler SP, West GA, Bhilocha S, de la Motte C, Sadler TM, *et al.* Inflammation-induced endothelial-to-mesenchymal transition: a novel mechanism of intestinal fibrosis. *Am J Pathol* 2011;**179**:2660-73.
- 20 Pfaffl MW. A new mathematical model for relative quantification in real-time RT-PCR. *Nucleic Acids Res* 2001;**29**:e45.
- 21 Qureshi OS, Bon H, Twomey B, Holdsworth G, Ford K, Bergin M, *et al.* An immunofluorescence assay for extracellular matrix components highlights the role of epithelial cells in producing a stable, fibrillar extracellular matrix. *Biol Open* 2017;**6**:1423-33.
- 22 Bon H, Hales P, Lumb S, Holdsworth G, Johnson T, Qureshi O, *et al.* Spontaneous Extracellular Matrix Accumulation in a Human in vitro Model of Renal Fibrosis Is Mediated by alphaV Integrins. *Nephron* 2019;**142**:328-50.
- 23 Holdsworth G, Bon H, Bergin M, Qureshi O, Paveley R, Atkinson J, *et al.* Quantitative and organisational changes in mature extracellular matrix revealed through high-content imaging of total protein fluorescently stained in situ. *Sci Rep* 2017;**7**:9963.
