# Supplementary material
Source: PubMed Central journal article supplement (PMC11248270)

Figure S1

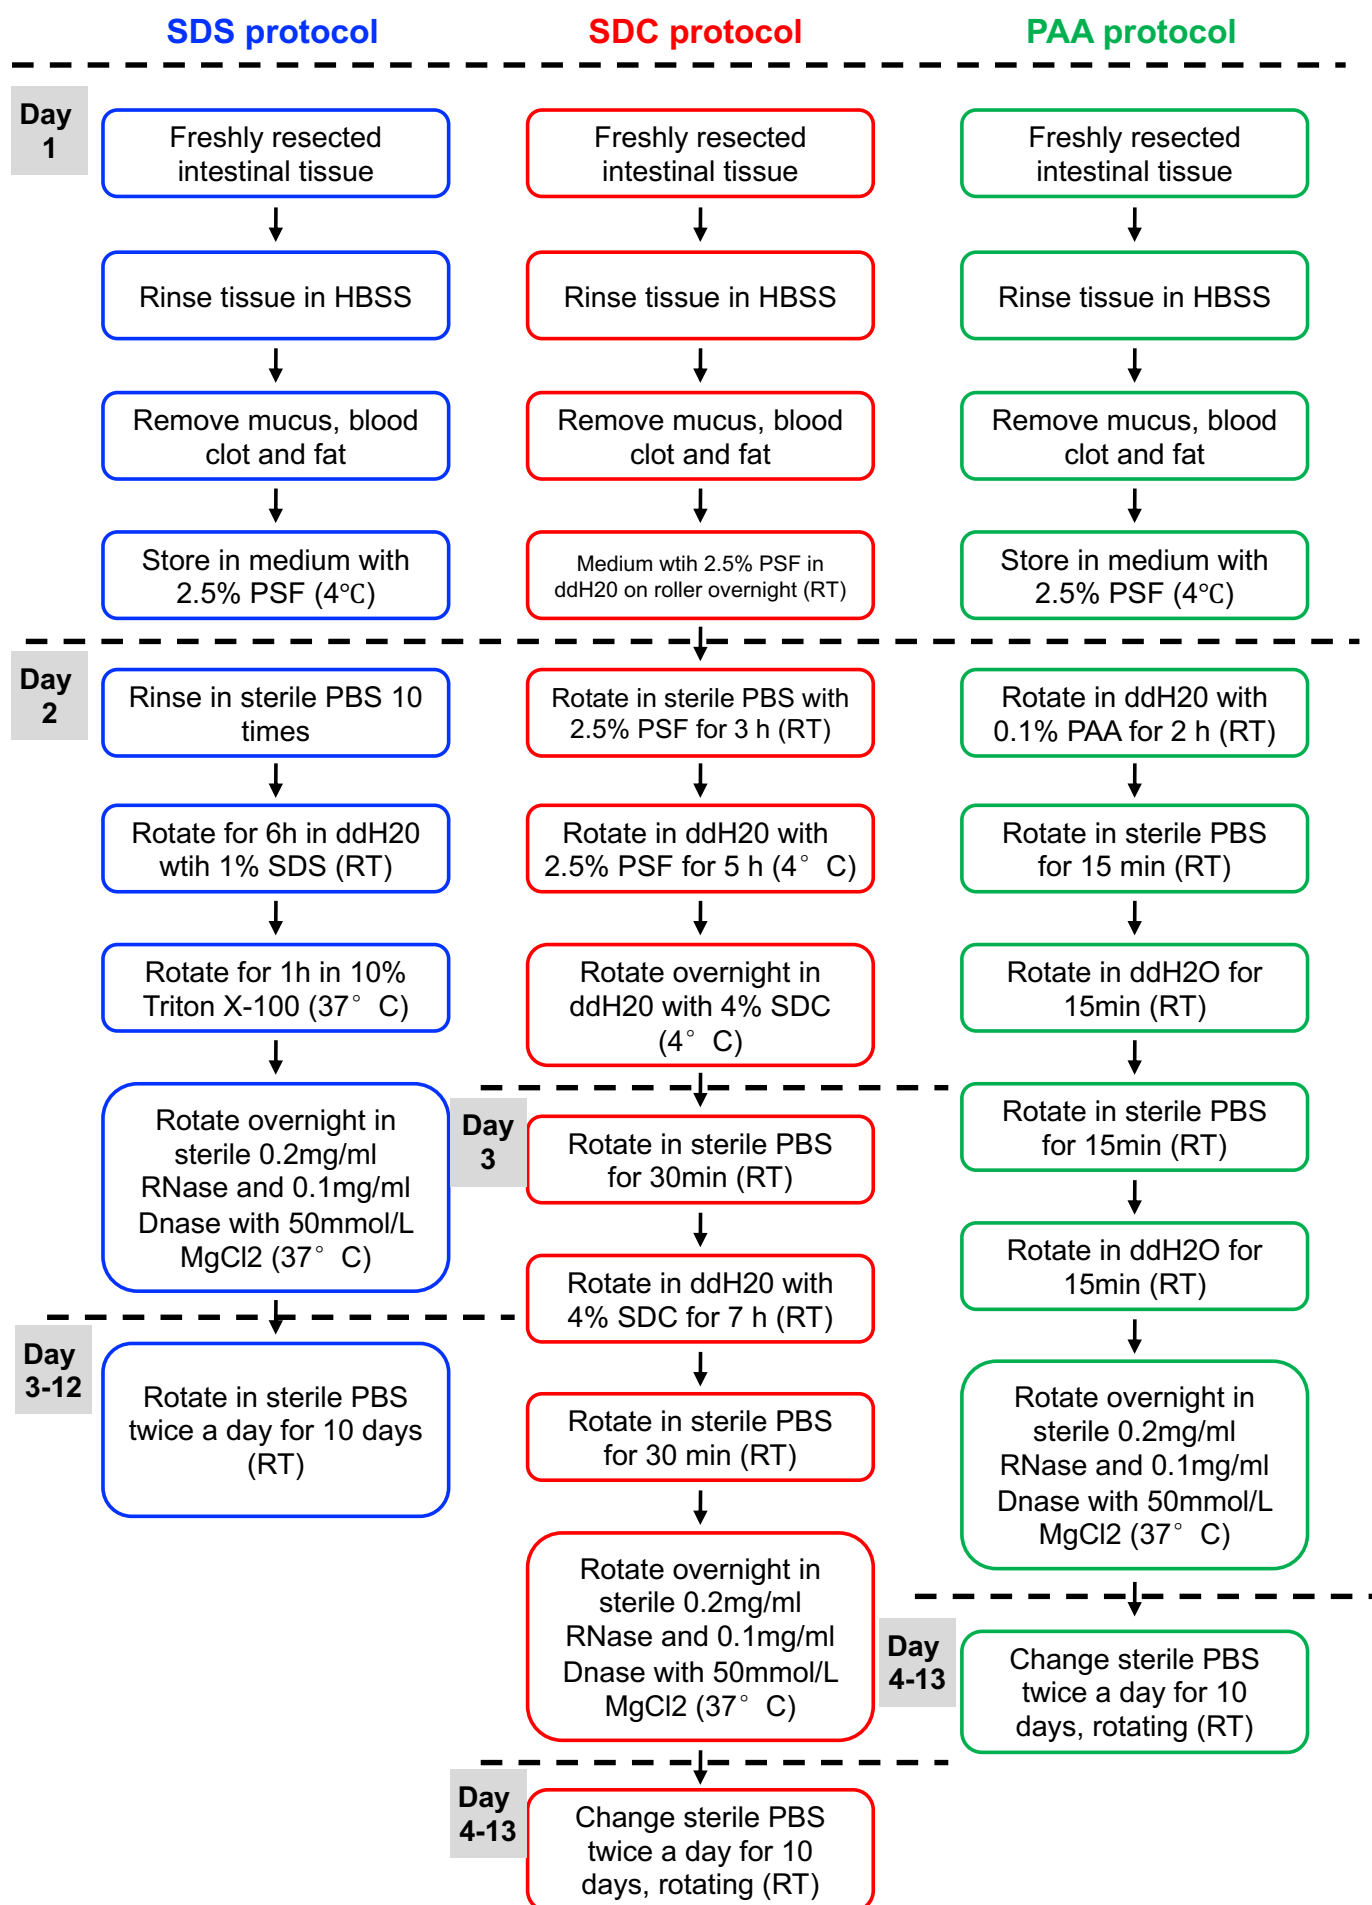

Supplement: NIHMS1972559-supplement-Suppl_Figure_1.pdf [file NIHMS1972559-supplement-Suppl_Figure_1.pdf]

Figure S10

A

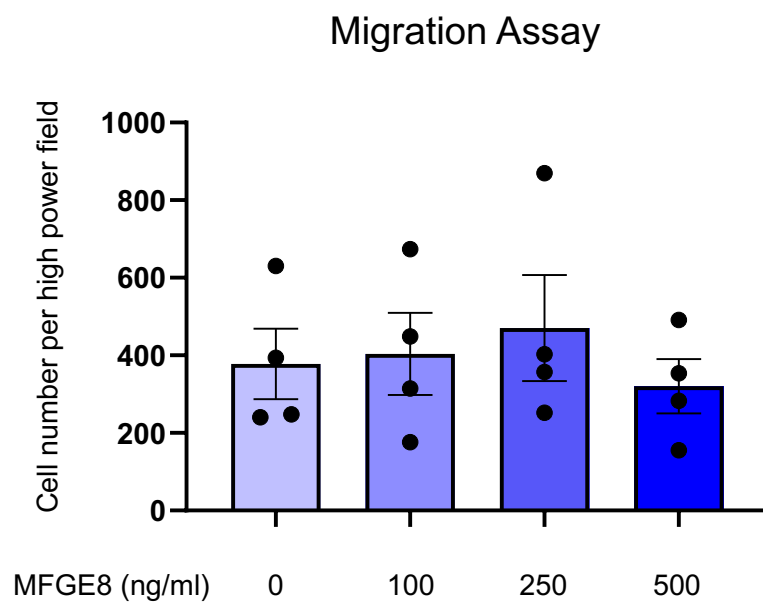

B

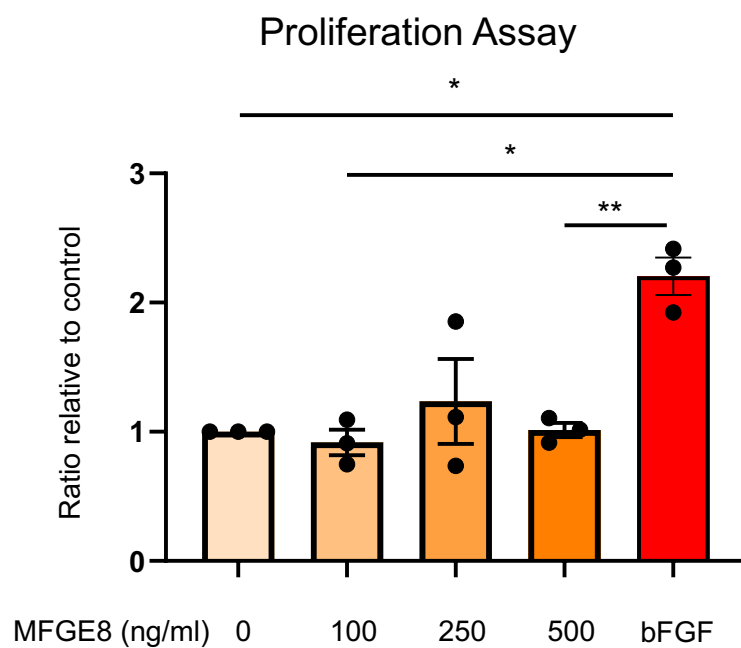

Supplement: NIHMS1972559-supplement-Suppl_Figure_10.pdf [file NIHMS1972559-supplement-Suppl_Figure_10.pdf]

Figure S11

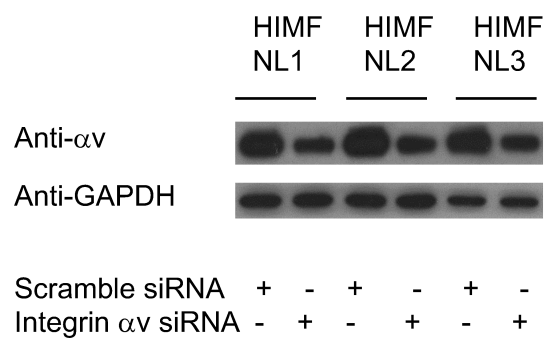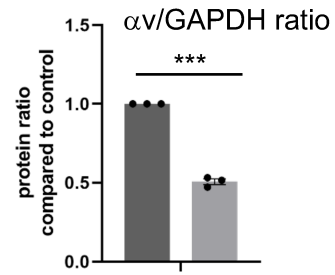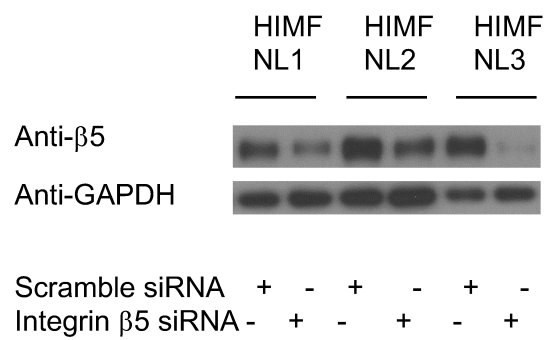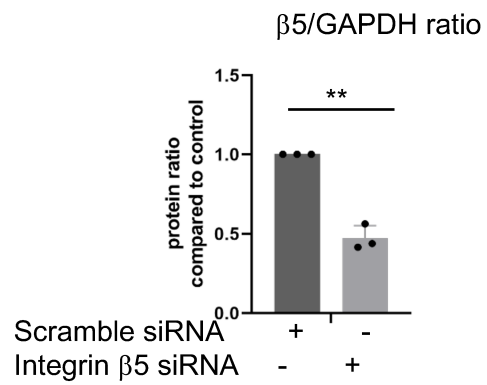

Supplement: NIHMS1972559-supplement-Suppl_Figure_11.pdf [file NIHMS1972559-supplement-Suppl_Figure_11.pdf]

Figure S12

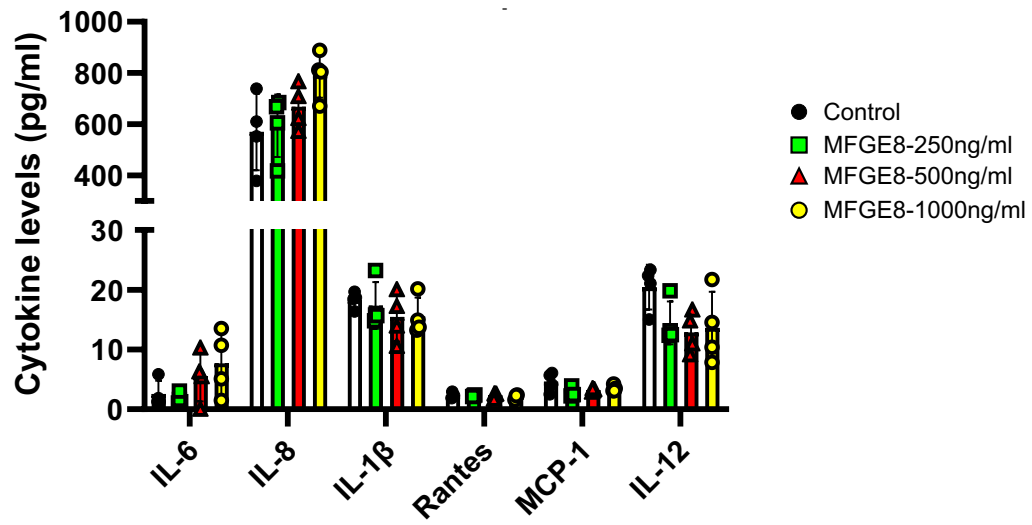

Supplement: NIHMS1972559-supplement-Suppl_Figure_12.pdf [file NIHMS1972559-supplement-Suppl_Figure_12.pdf]

Figure S13

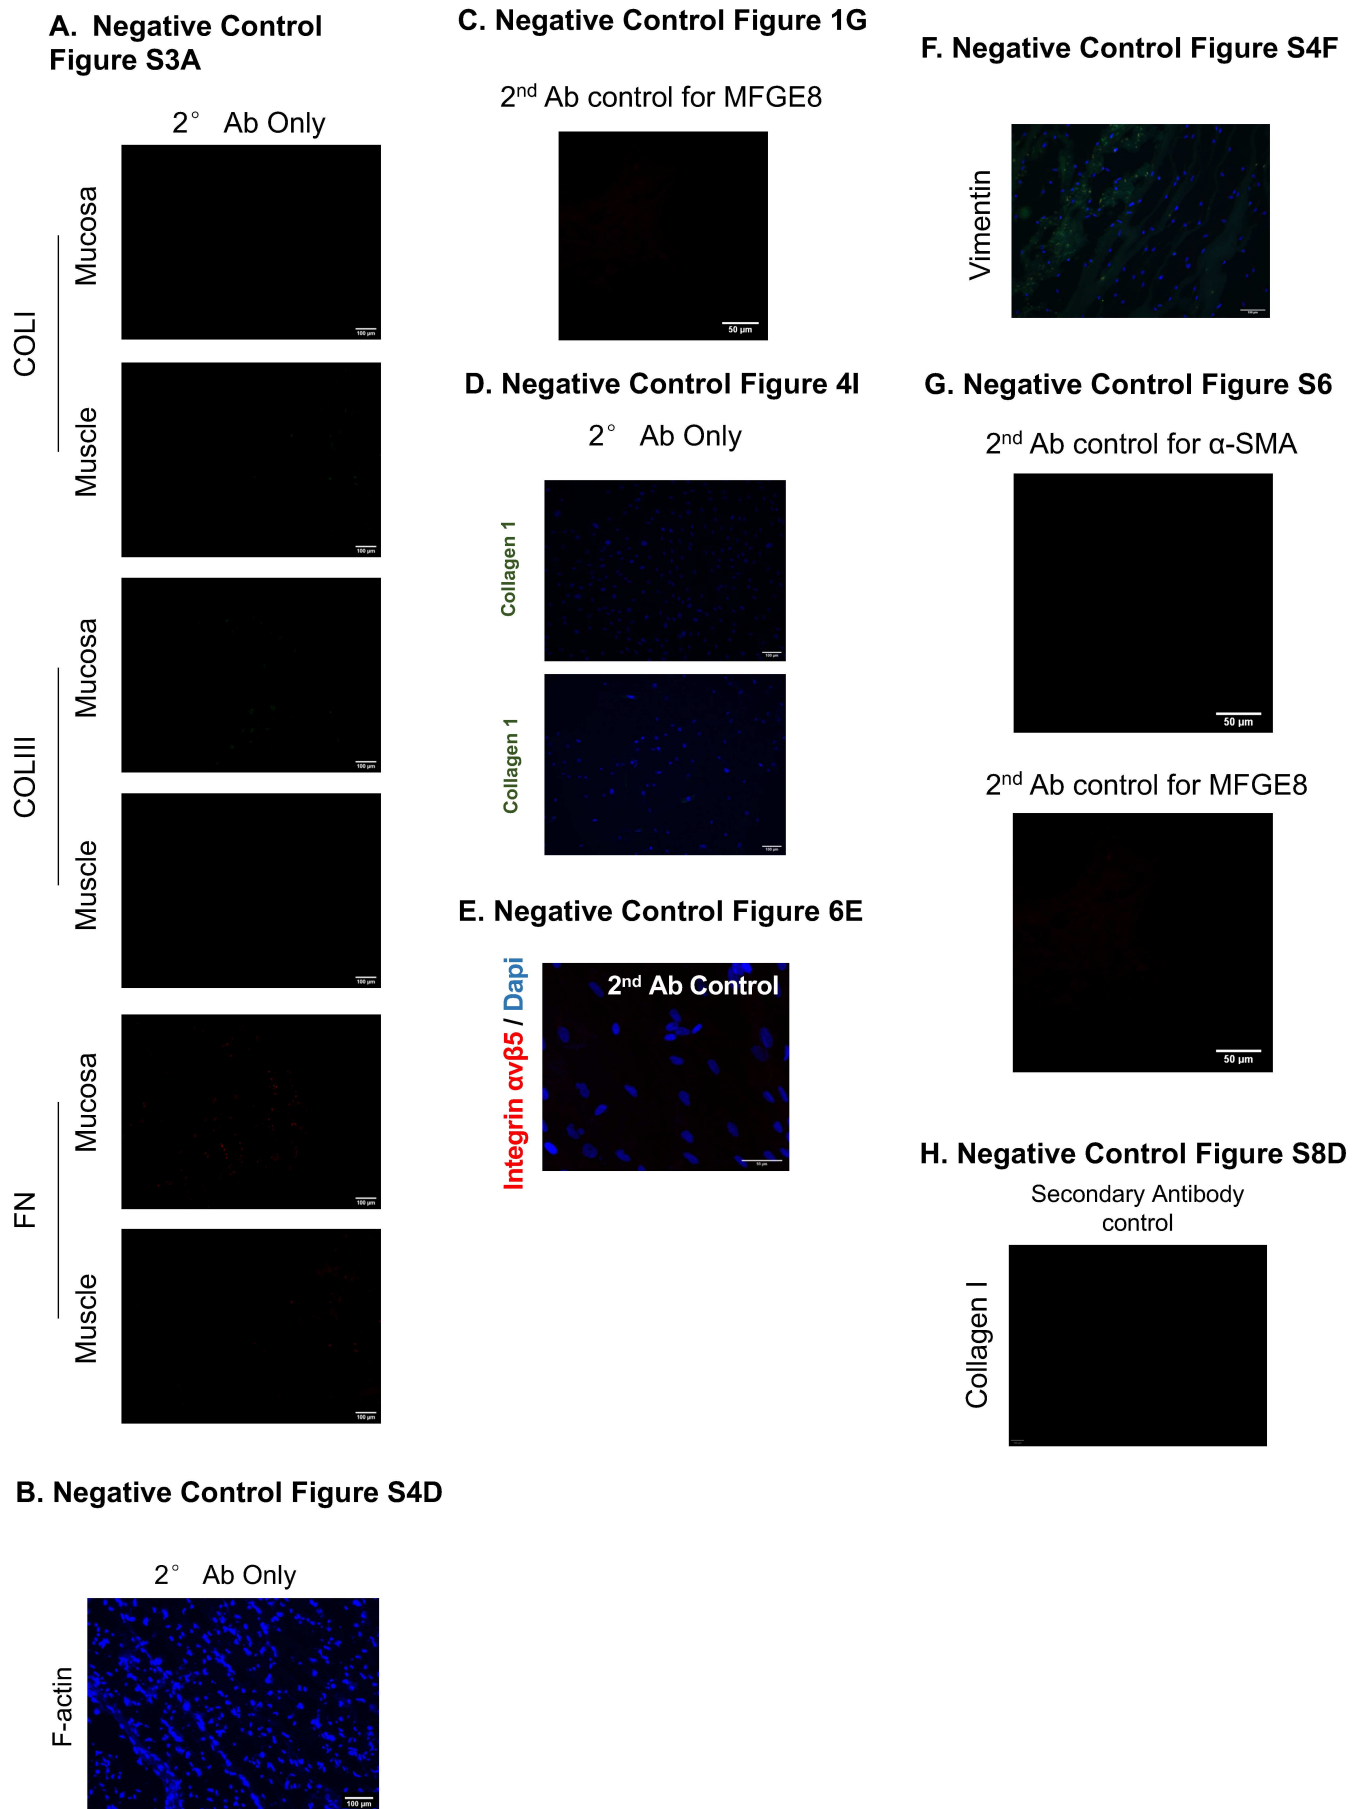

Supplement: NIHMS1972559-supplement-Suppl_Figure_13.pdf [file NIHMS1972559-supplement-Suppl_Figure_13.pdf]

Figure S2

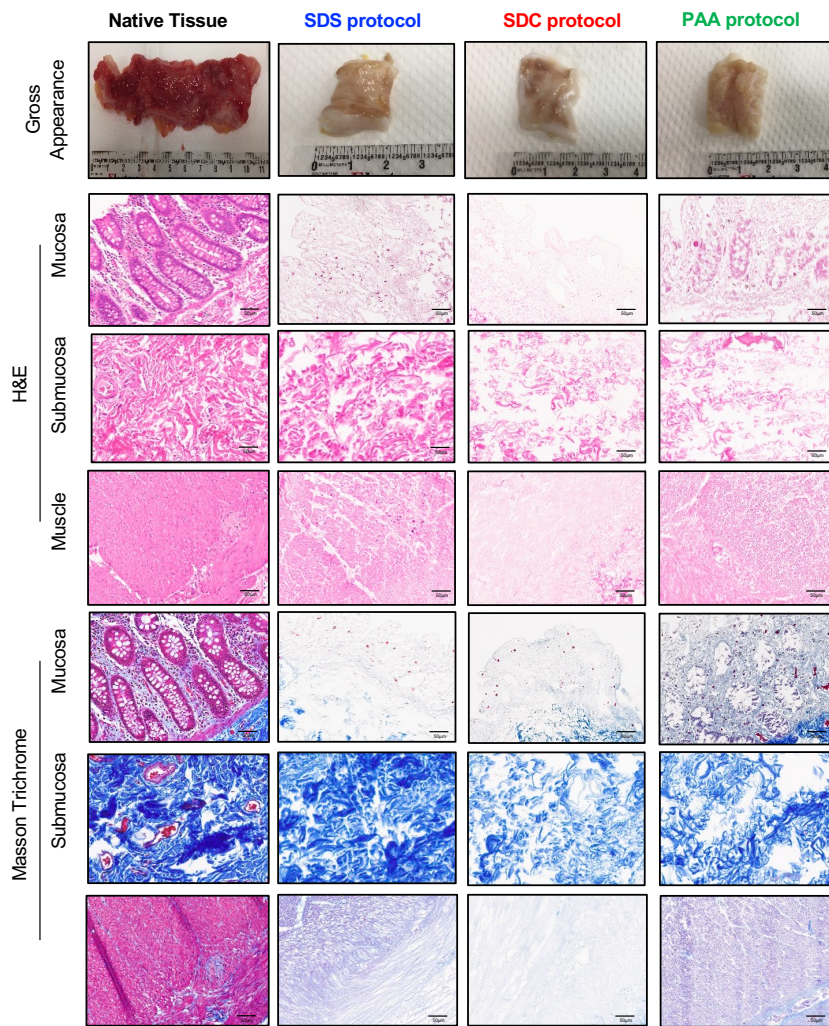

Supplement: NIHMS1972559-supplement-Suppl_Figure_2.pdf [file NIHMS1972559-supplement-Suppl_Figure_2.pdf]

Figure S3

A

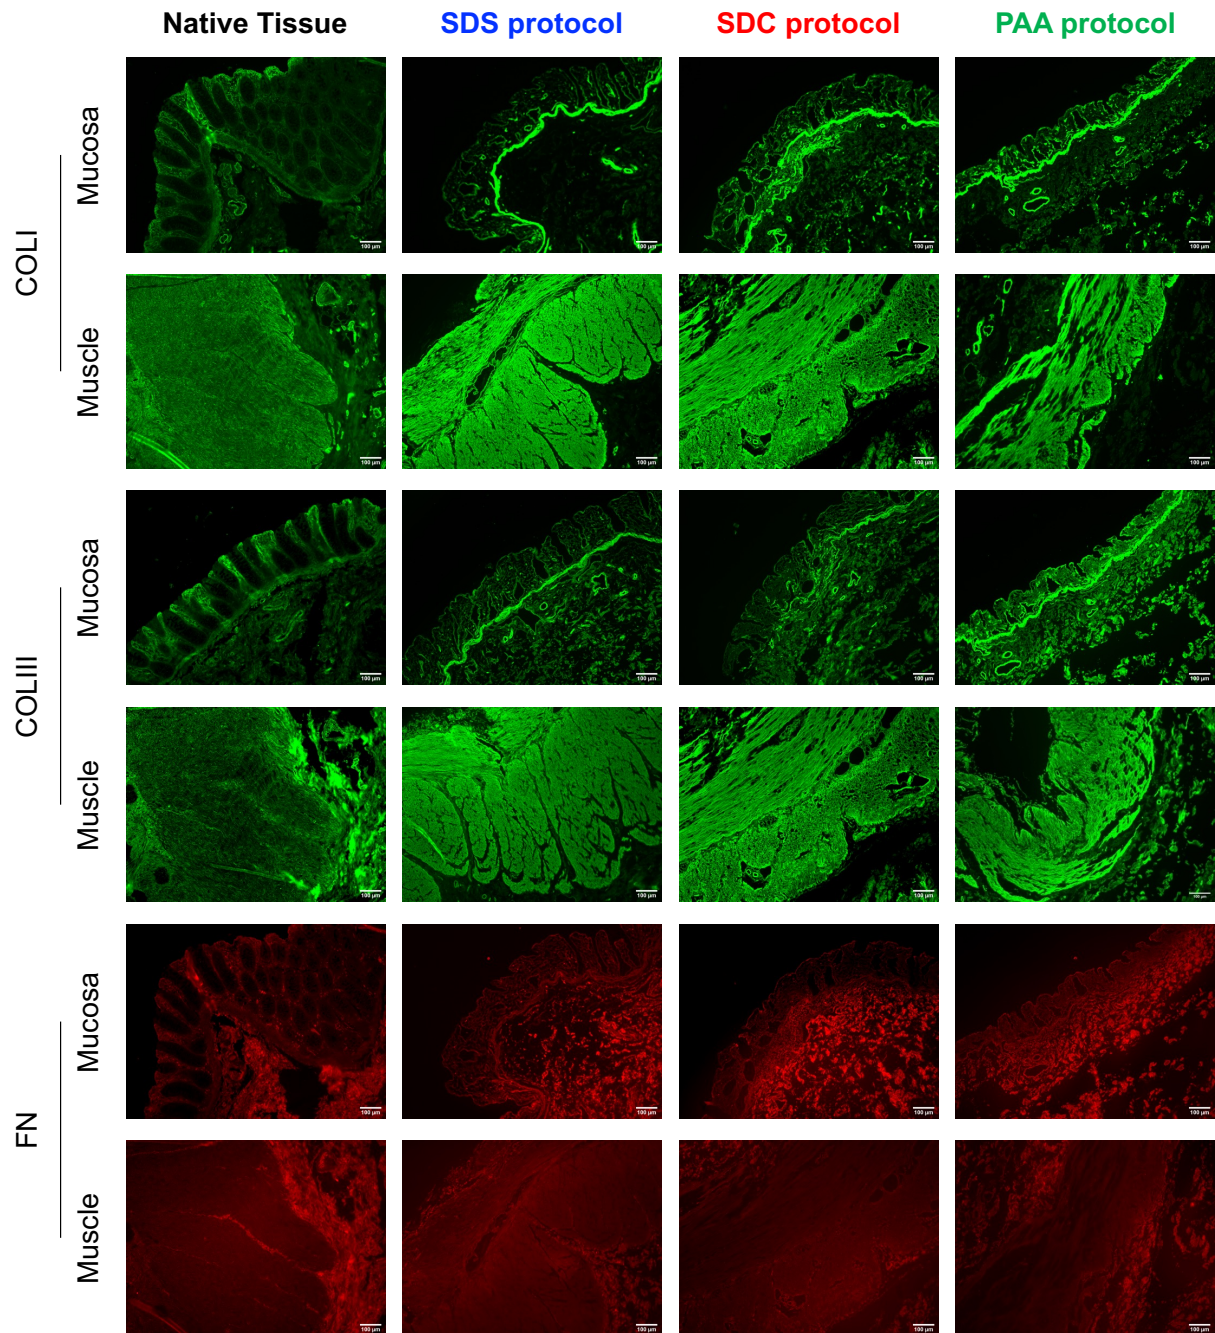

Supplement: NIHMS1972559-supplement-Suppl_Figure_3A.pdf [file NIHMS1972559-supplement-Suppl_Figure_3A.pdf]

Figure S3

B

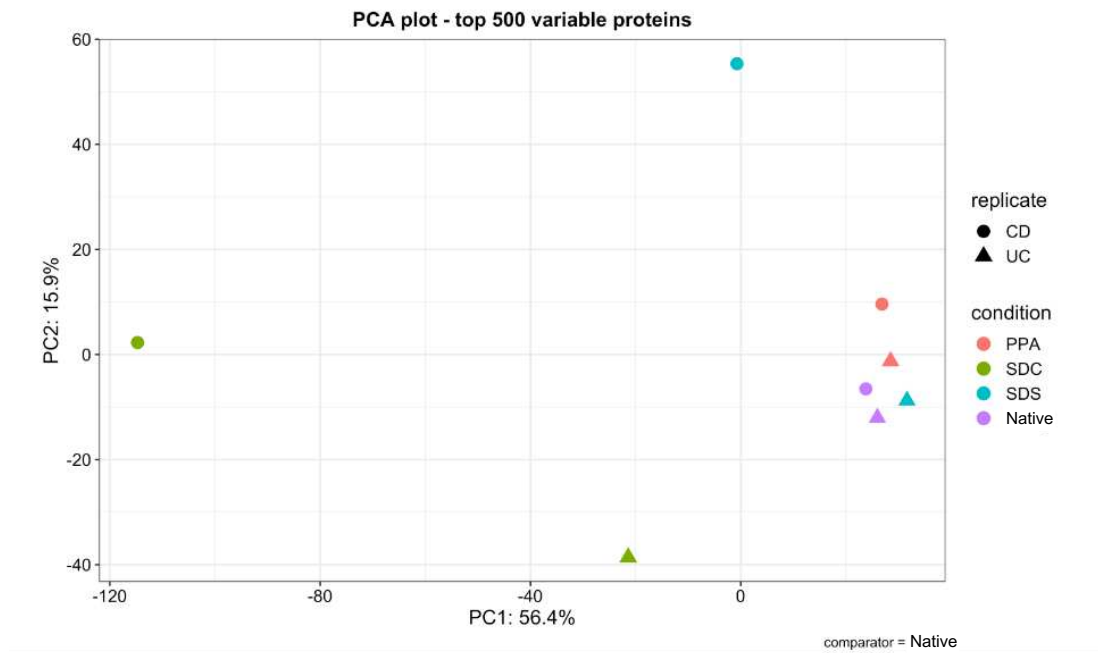

C

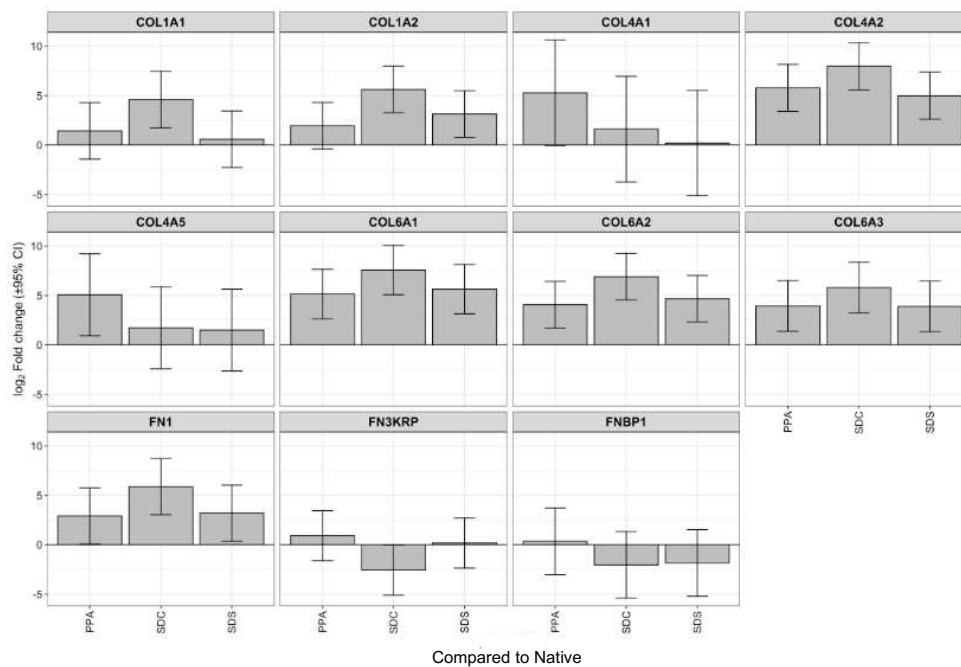

Supplement: NIHMS1972559-supplement-Suppl_Figure_3B_C.pdf [file NIHMS1972559-supplement-Suppl_Figure_3B_C.pdf]

Figure S4

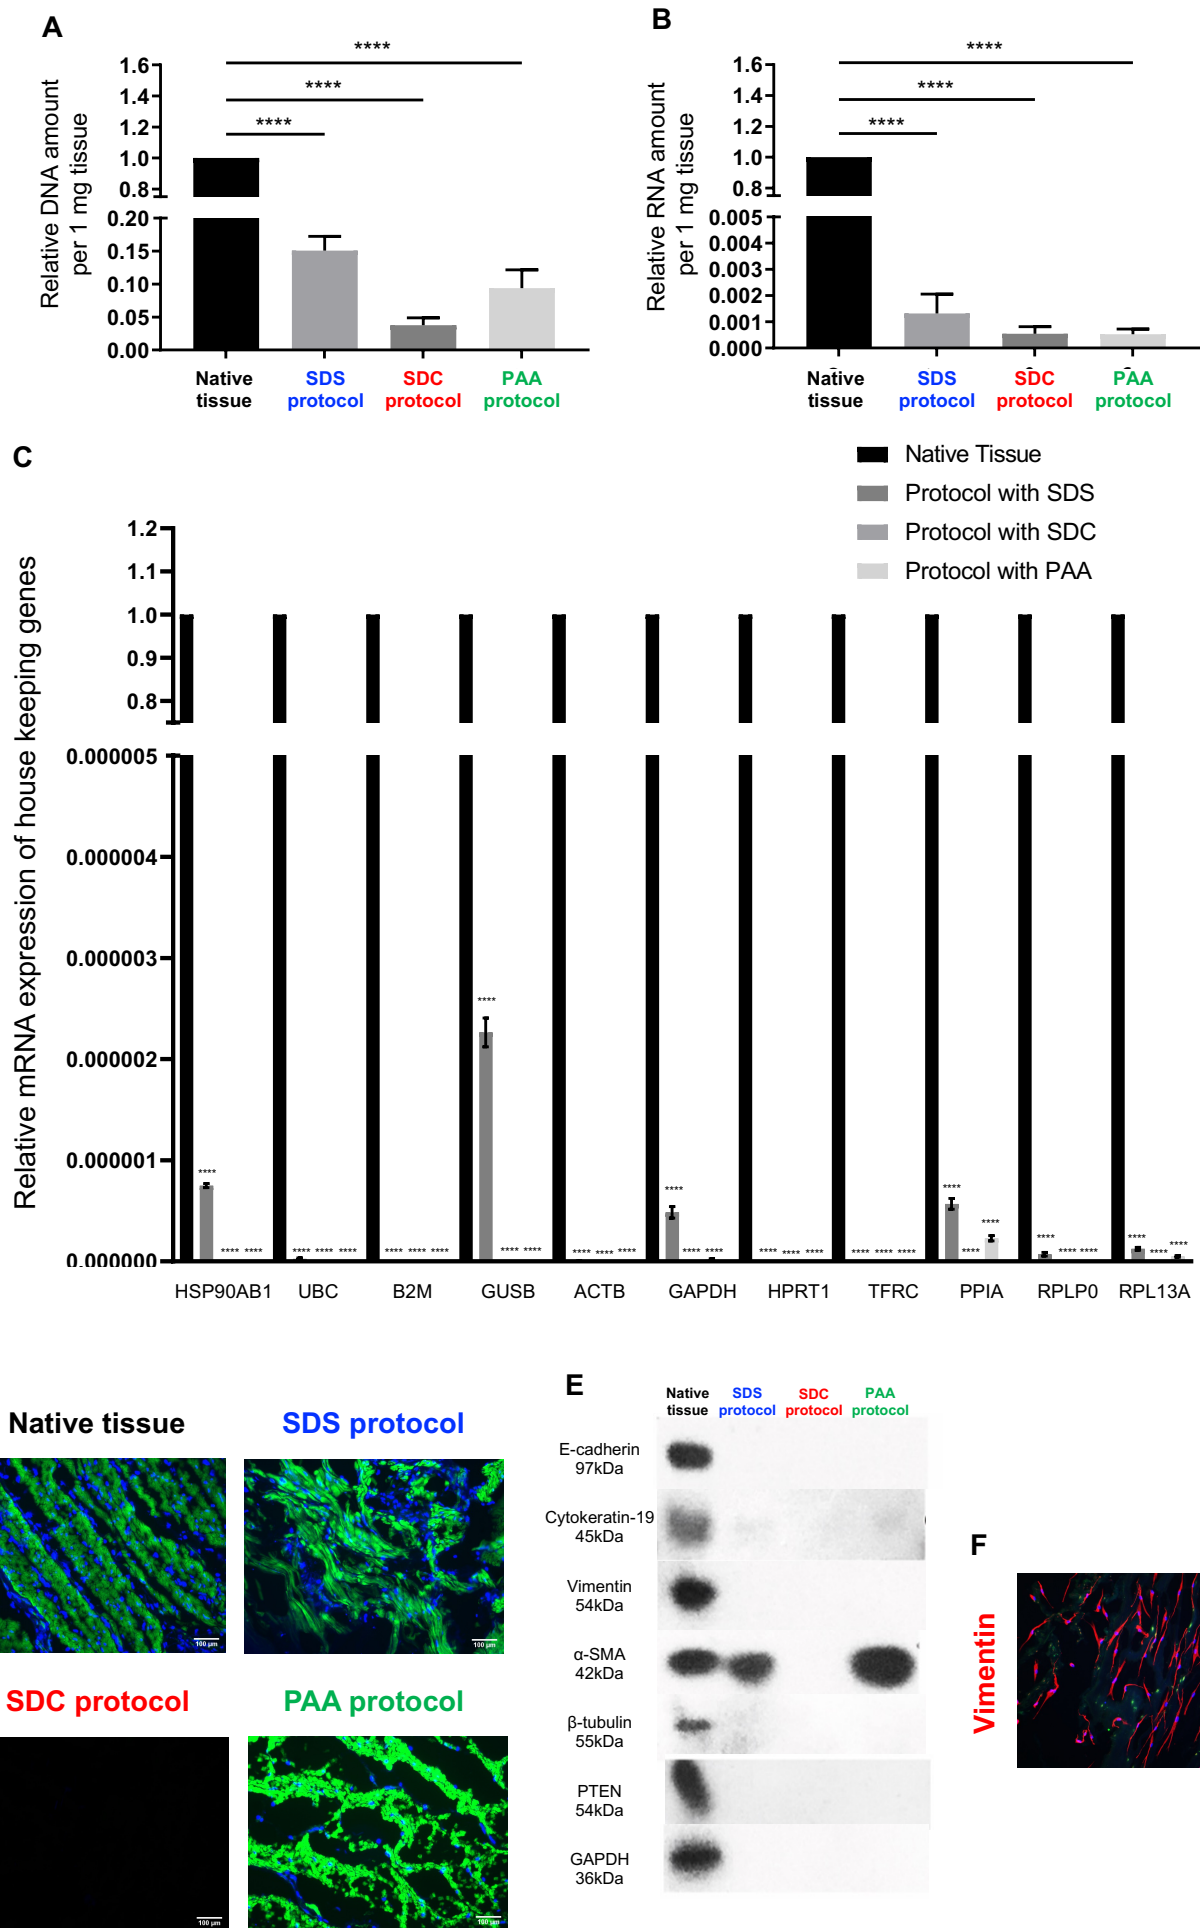

Supplement: NIHMS1972559-supplement-Suppl_Figure_4.pdf [file NIHMS1972559-supplement-Suppl_Figure_4.pdf]

Figure S5

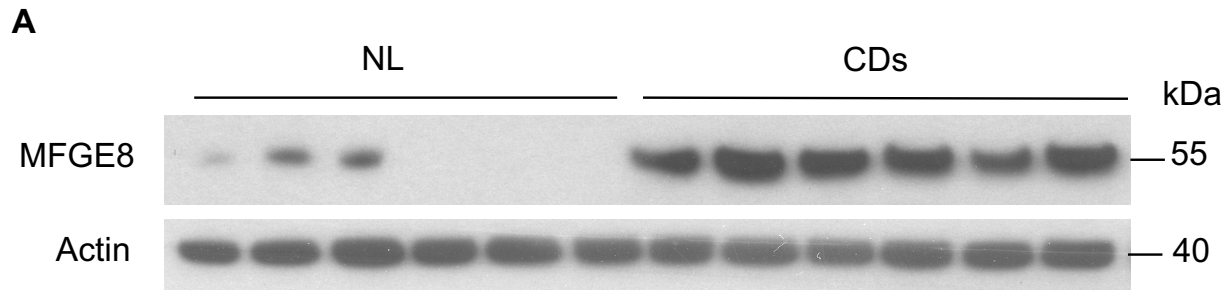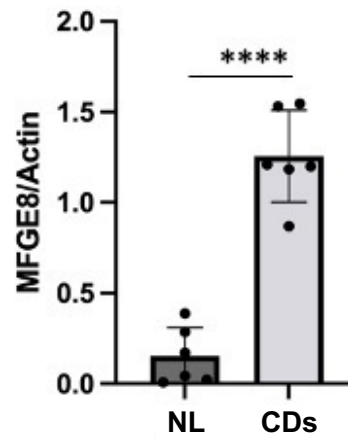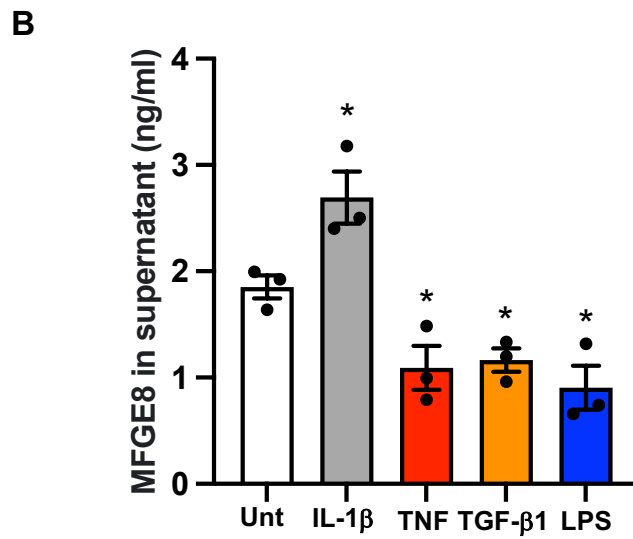

Supplement: NIHMS1972559-supplement-Suppl_Figure_5.pdf [file NIHMS1972559-supplement-Suppl_Figure_5.pdf]

Figure S6

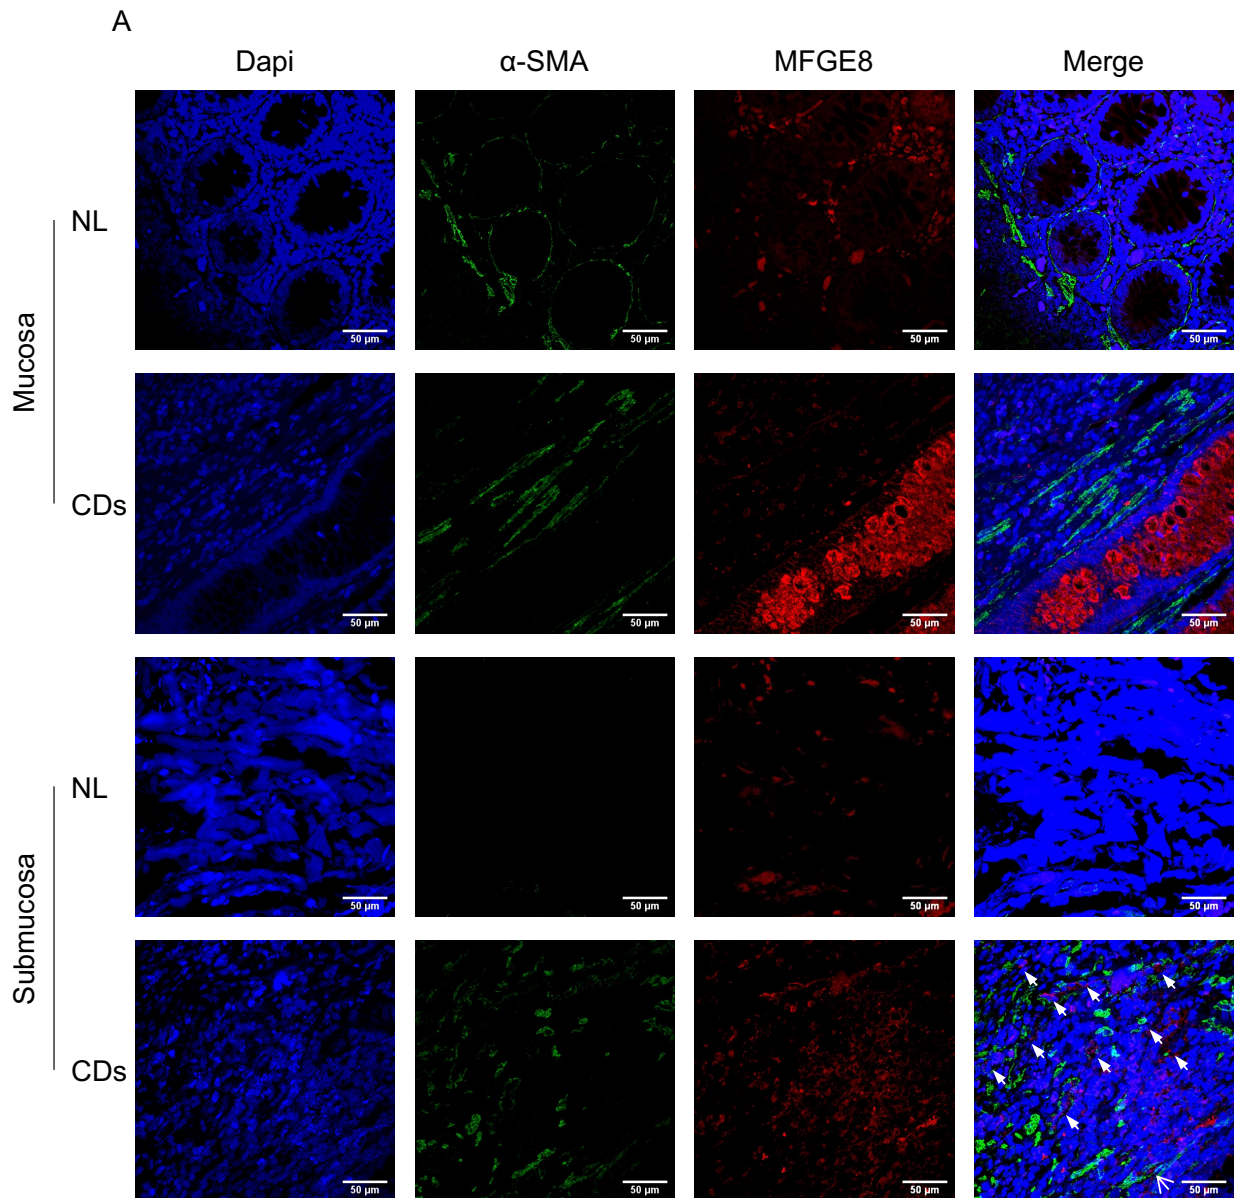

Supplement: NIHMS1972559-supplement-Suppl_Figure_6.pdf [file NIHMS1972559-supplement-Suppl_Figure_6.pdf]

Figure S7

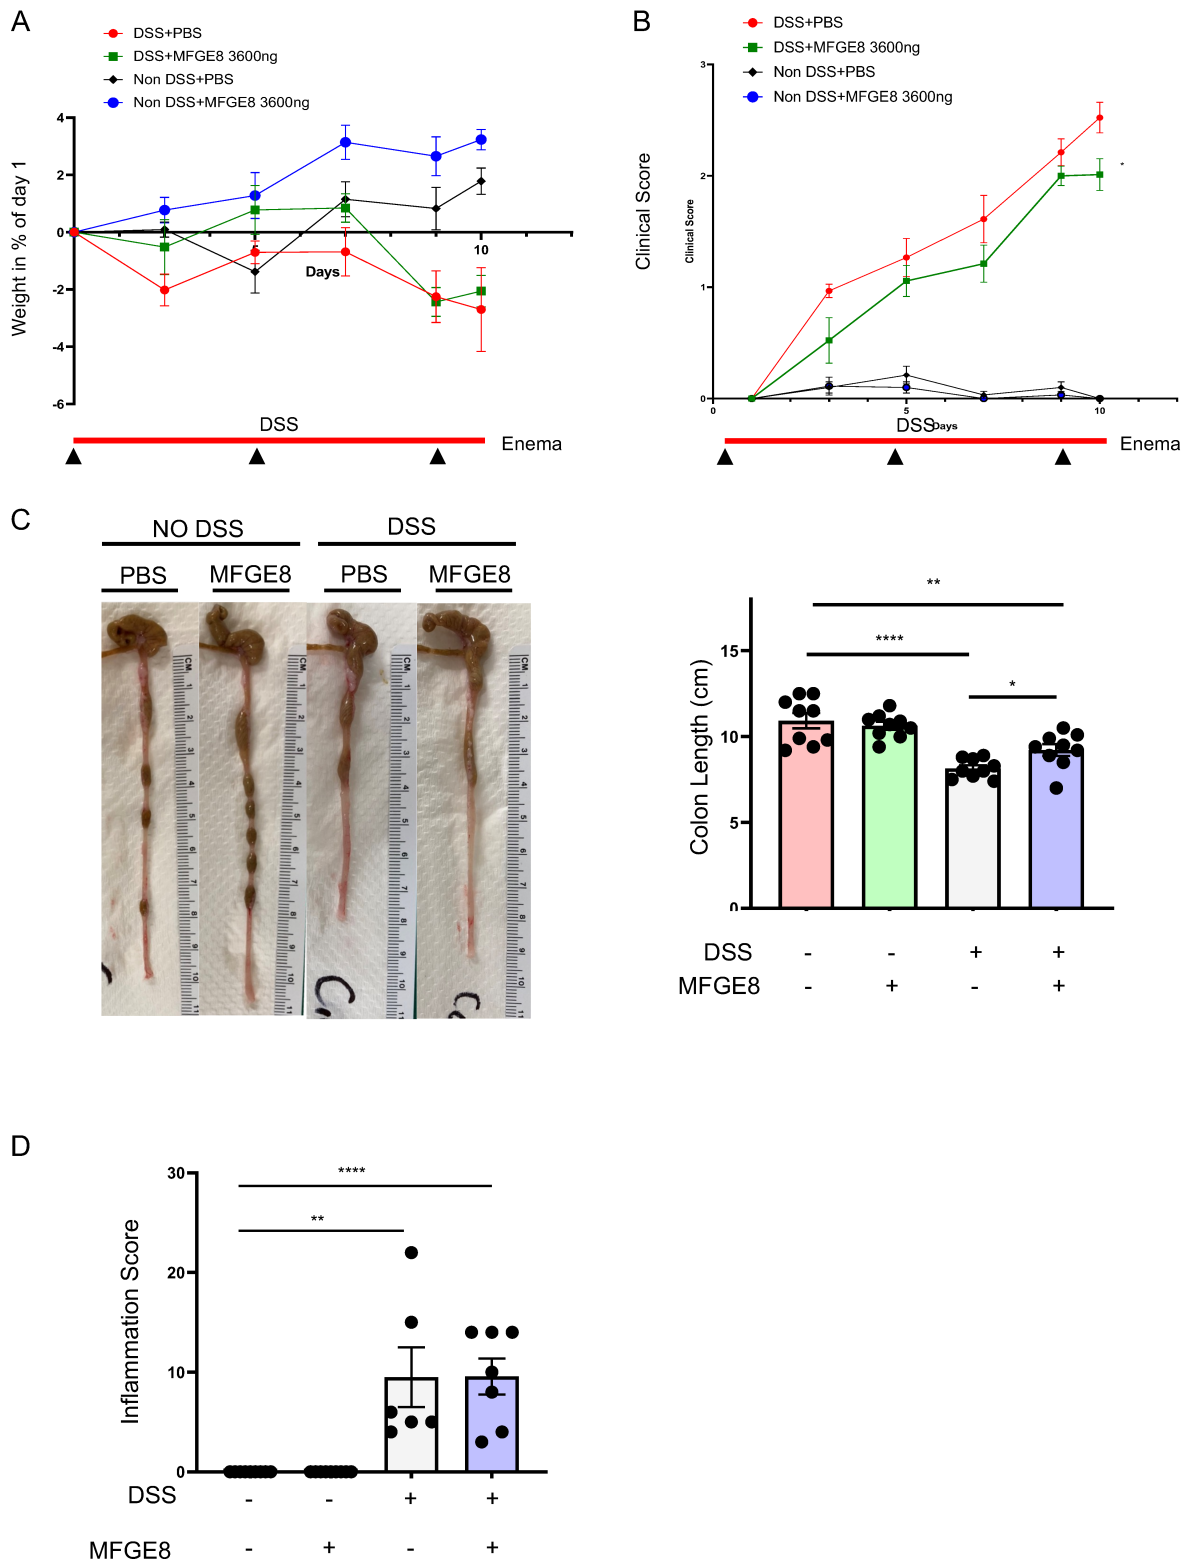

Supplement: NIHMS1972559-supplement-Suppl_Figure_7.pdf [file NIHMS1972559-supplement-Suppl_Figure_7.pdf]

**Figure S8**

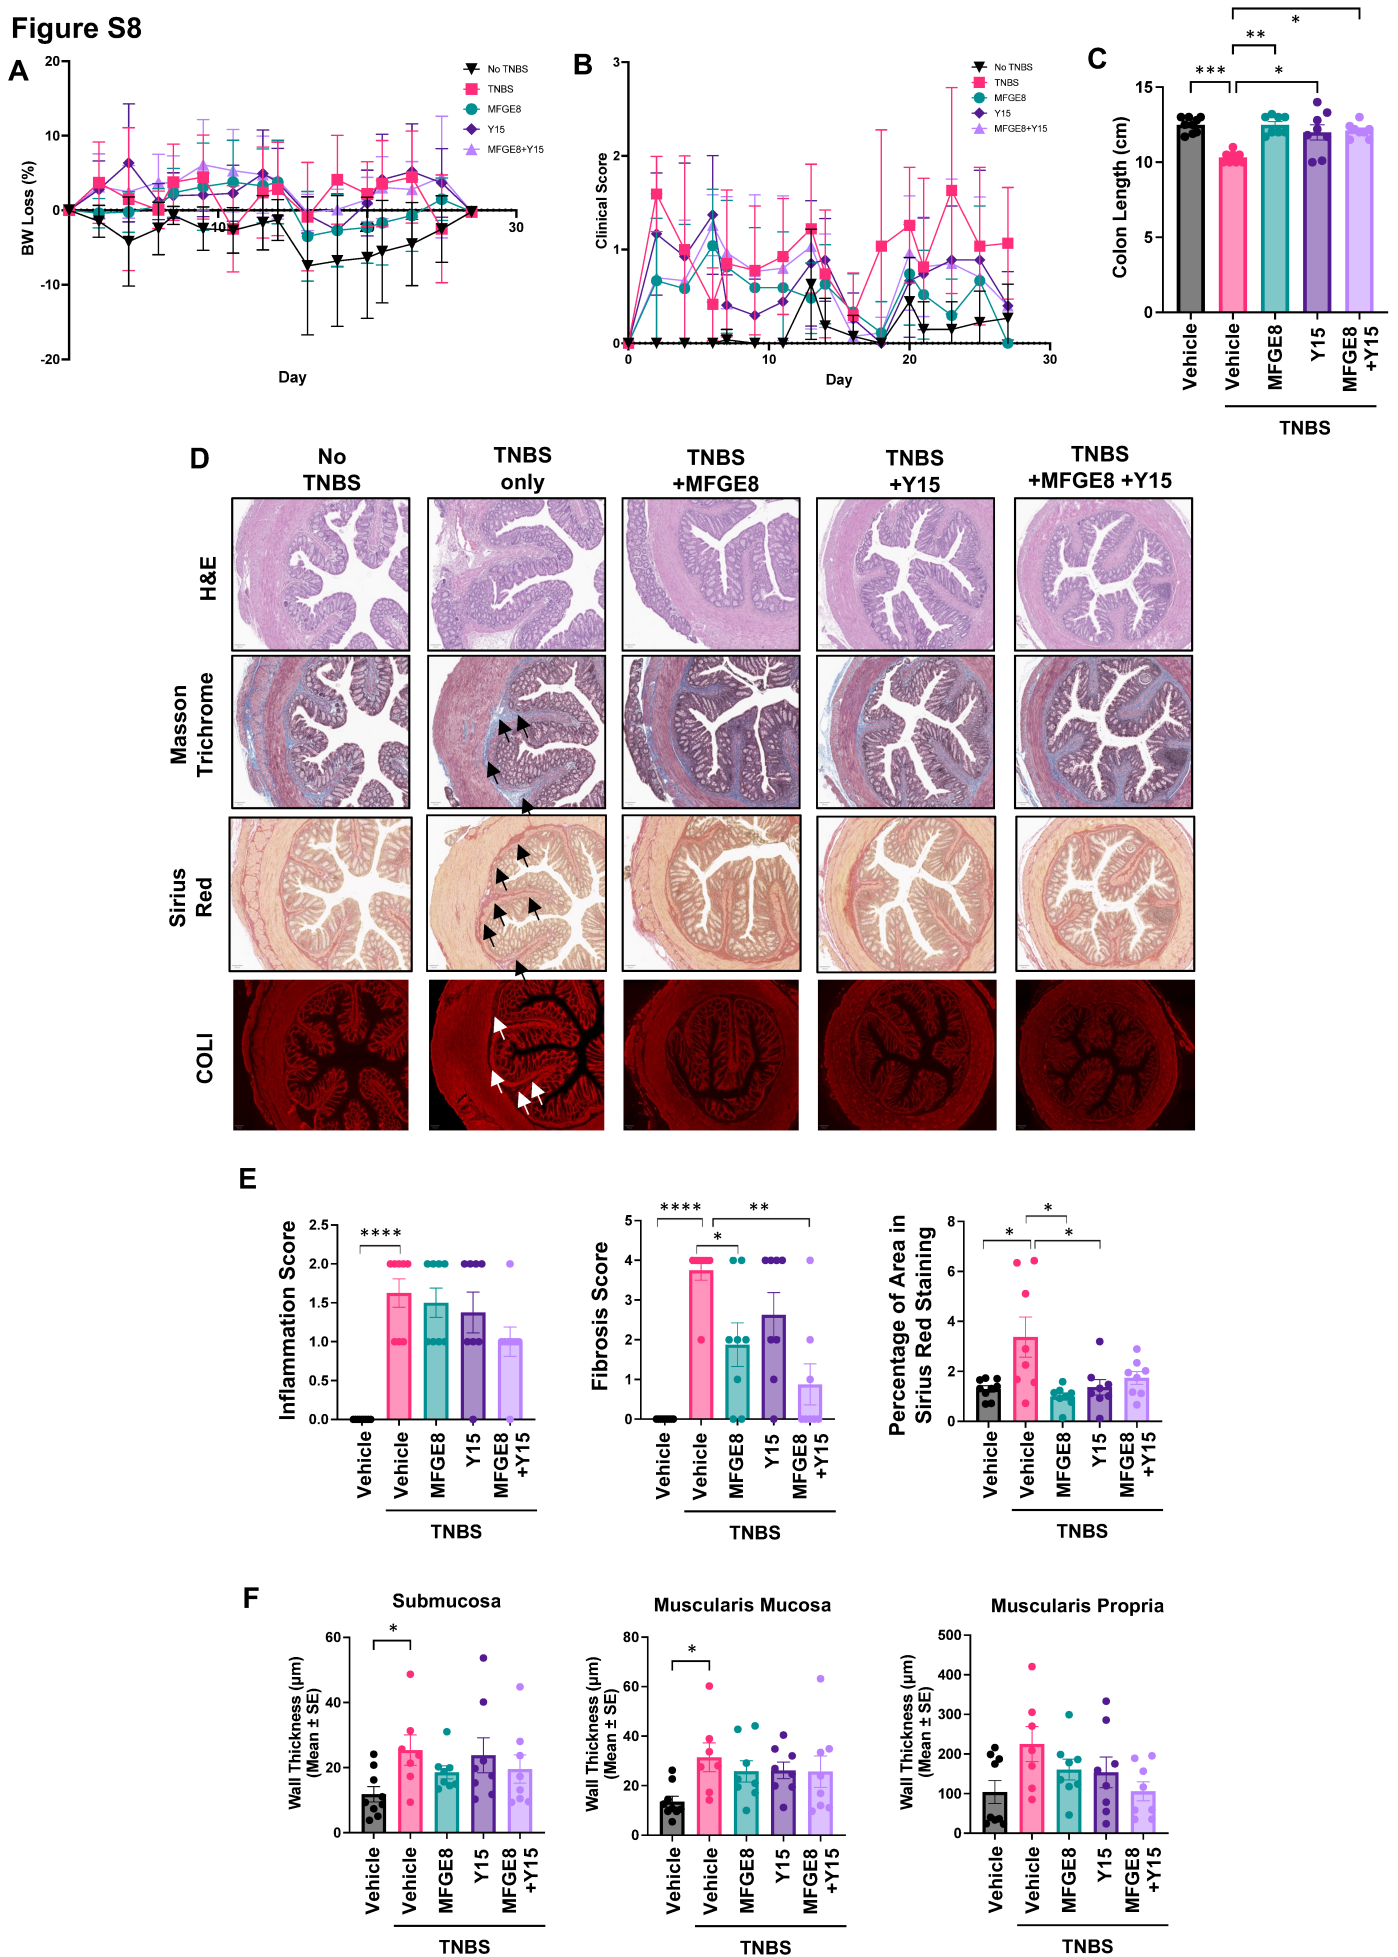

Supplement: NIHMS1972559-supplement-Suppl_Figure_8.pdf [file NIHMS1972559-supplement-Suppl_Figure_8.pdf]

Figure S9

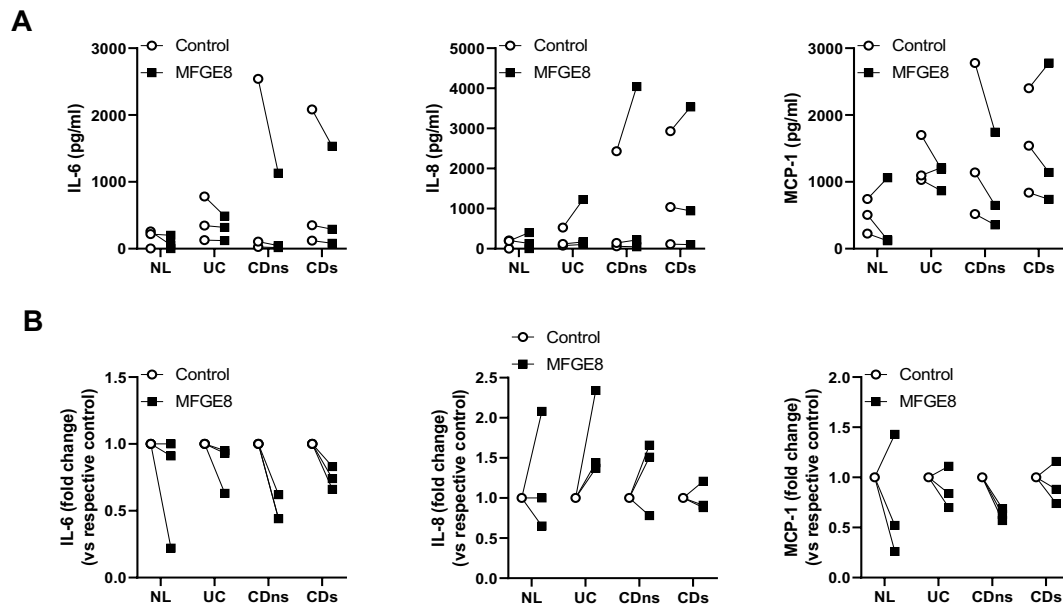

Supplement: NIHMS1972559-supplement-Suppl_Figure_9.pdf [file NIHMS1972559-supplement-Suppl_Figure_9.pdf]

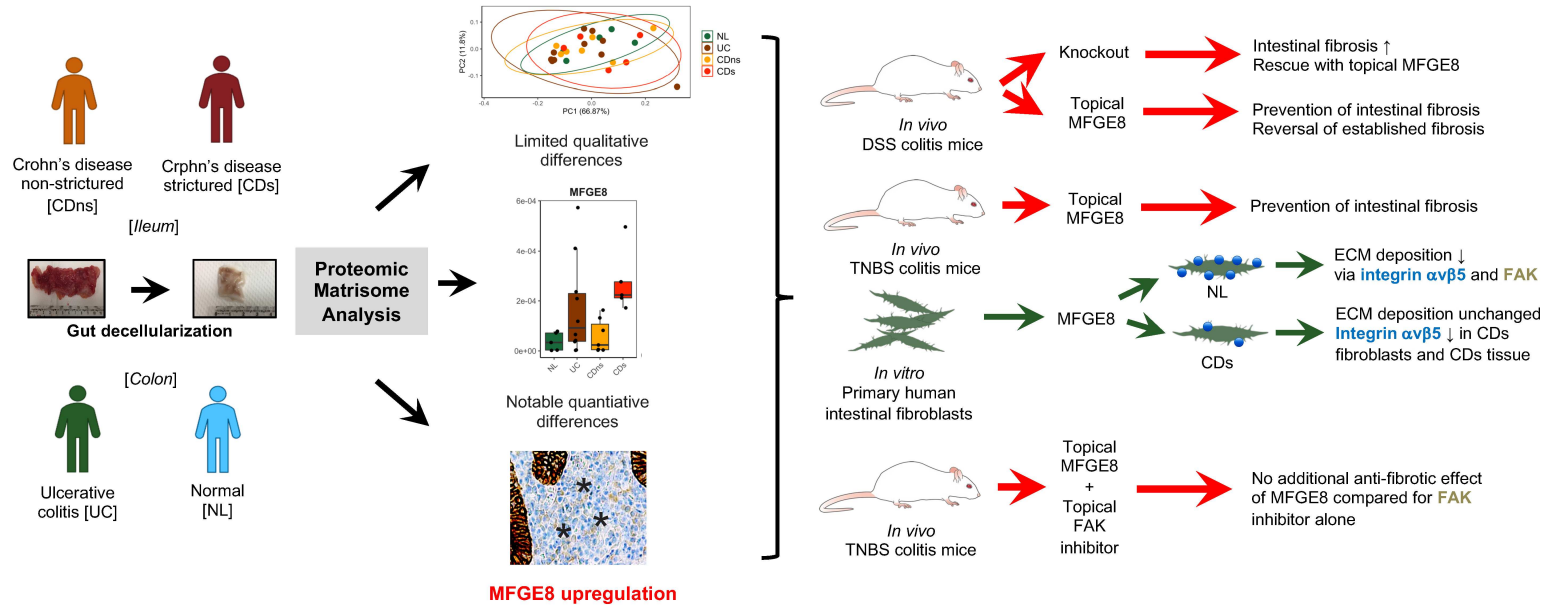

Supplement: NIHMS1972559-supplement-Suppl_Material.pdf [file NIHMS1972559-supplement-Suppl_Material.pdf]
